# Supplementary material for: K2S2O8-mediated direct C–H heteroarylation/hydroxylation of indolin-2-ones with quinoxalin-2(1H)-ones
Source: Royal Society of Chemistry journal article supplement (doi:10.1039/d3ob01792c), 2023-11-21
Supplement: d3ob01792c1.pdf [file d3ob01792c1.pdf]

# Supporting Information

**K<sub>2</sub>S<sub>2</sub>O<sub>8</sub> Mediated Direct C-H Heteroarylation/Hydroxylation of**

**Indolin-2-ones with Quinoxalin-2(1*H*)-ones**

Hui Qin, Guoliang Wei, Yutao Lou, Xiaowei Zheng, Meihua Bao, Yiwen Zhang and

Ping Huang

## **List of Contents**

|                                                            |        |
|------------------------------------------------------------|--------|
| 1. General information                                     | S2     |
| 2. General procedure for the synthesis of target compounds | S2     |
| 3. Free radical-trapping experiment                        | S2-5   |
| 4. Characterization of products                            | S5-14  |
| 5. References                                              | S15-16 |
| 5. Copies of NMR and HR-ESI-MS Spectra                     | S16-62 |

## 1. General information

Unless stated otherwise, all reactions for preparing compound **3a-3ak** were carried out under an air atmosphere. All reagents and solvents were of commercial quality and were used without further purification. Purification was carried out according to standard laboratory methods<sup>1</sup>. All reactions were monitored by TLC analysis with silica gel-coated plates with fluorescent indicator UV254. <sup>1</sup>H and <sup>13</sup>C NMR spectra were obtained on either a Bruker AV 400 at 400 MHz and 100 MHz, respectively. Chemical shifts are reported in ppm and coupling constants are reported in Hz with TMS at 0.0 ppm (<sup>1</sup>H and <sup>13</sup>C) and DMSO-*d*<sub>6</sub> referenced at 2.50 (<sup>1</sup>H) and 39.5 (<sup>13</sup>C). Mass spectra were measured with an AB4500 and Orbitrap Exploris™ 120 mass spectrometer using ESI ionization.

## 2. General procedure for the synthesis of 3a-ak

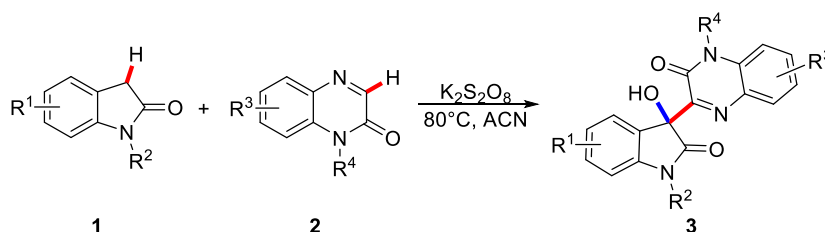

Different substituted oxindole **1** (0.2 mmol, 1.0 equiv.) and various quinoxalin-2-one **2** (0.24 mmol, 1.2 equiv.) was dissolved with 2 mL acetonitrile (ACN) and was treated with K<sub>2</sub>S<sub>2</sub>O<sub>8</sub> (0.4 mmol, 2.0 equiv.) at 80 °C under air atmosphere in a 10 mL thick-walled ground test tube. Then mixture was stirred until the reaction completed. The progress of the reaction was monitored by TLC. After that, reaction product was purified using column chromatography on silica gel with petroleum ether/ethyl acetate (2:1 to 1:2) or dichloromethane/methanol (100:0 to 100:1).

## 3. Free radical-trapping experiment

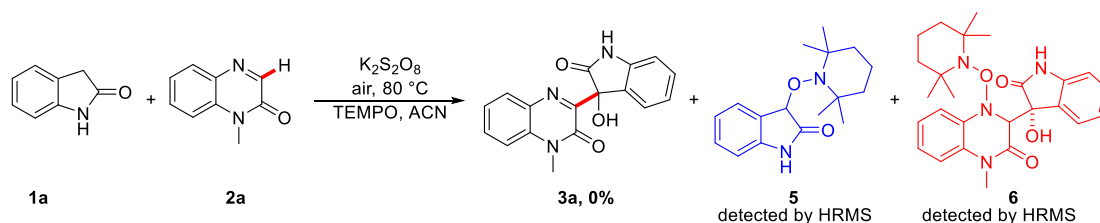

Oxindole (**1a**, 0.2 mmol), quinoxalin-2-one (**2a**, 0.24 mmol, 1.2 equiv.), K<sub>2</sub>S<sub>2</sub>O<sub>8</sub> (0.4 mmol, 2.0 equiv.) and 2,2,6,6-tetramethyl-1-piperidinyloxy (TEMPO, 0.4 mmol, 2.0 equiv.) were

added to a 10 mL thick-walled ground test tube with a magnetic stirring bar, then the reaction mixture was stirred at 80 °C for 4 h until the reaction completed. the desired product **3a** was not observed in reaction process via TLC monitored, but a free radical-trapping adduct **5** and **6** was detected by LC-MS and HRMS of the reaction solution, indicating that was proposed to go through a radical process (Figure S1 and S2).

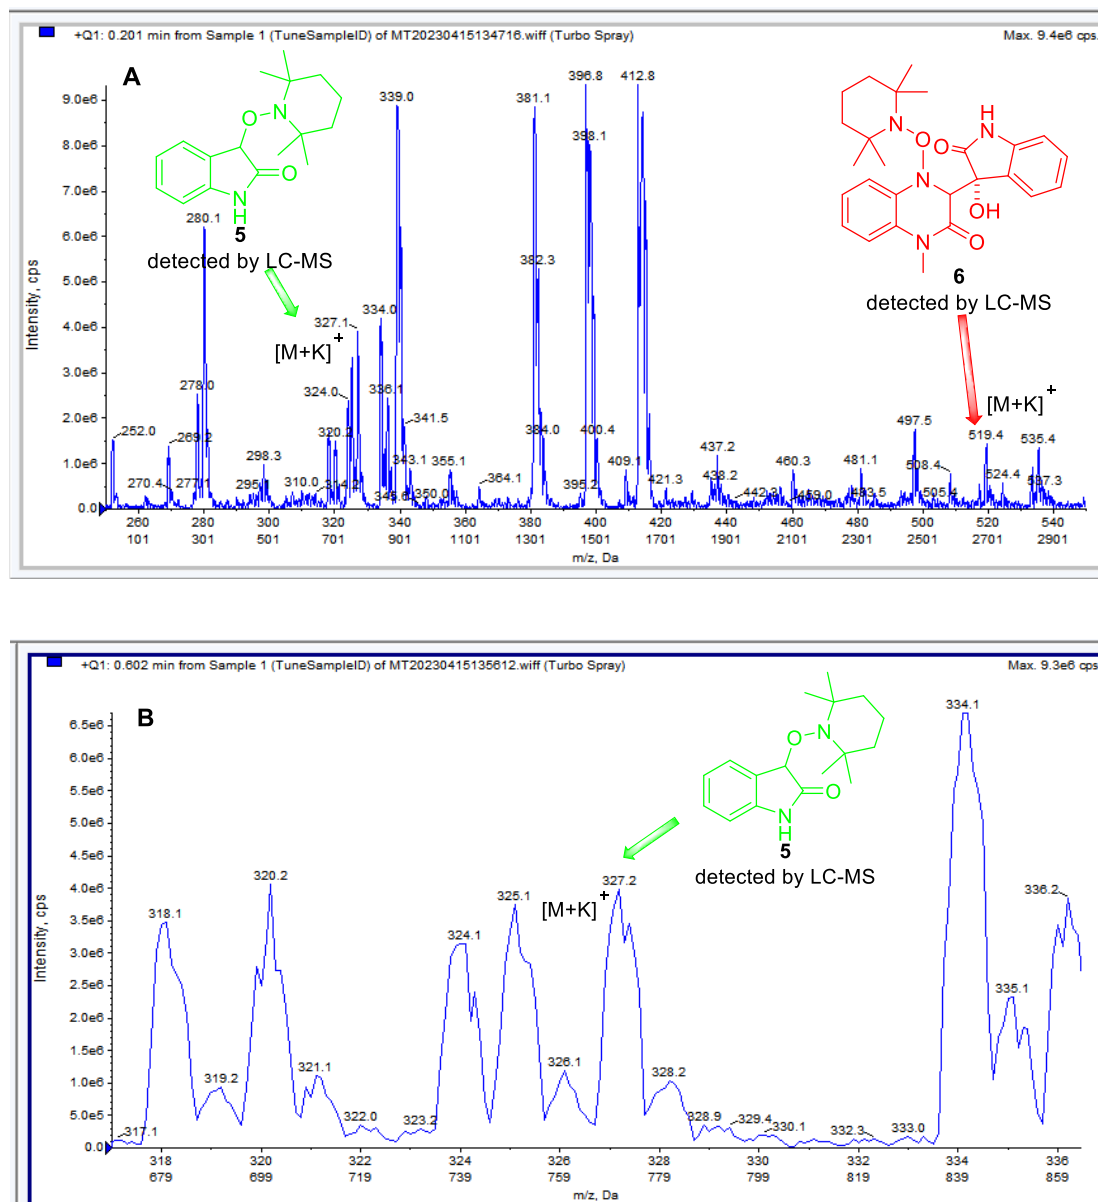

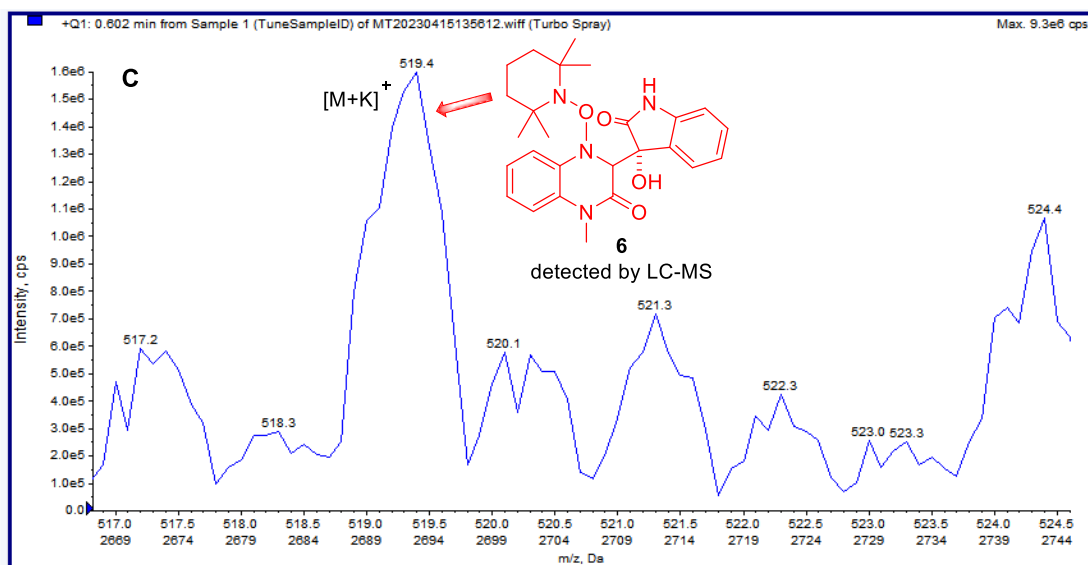

**Figure S1. LC-MS analysis of the adduct 5 and 6**

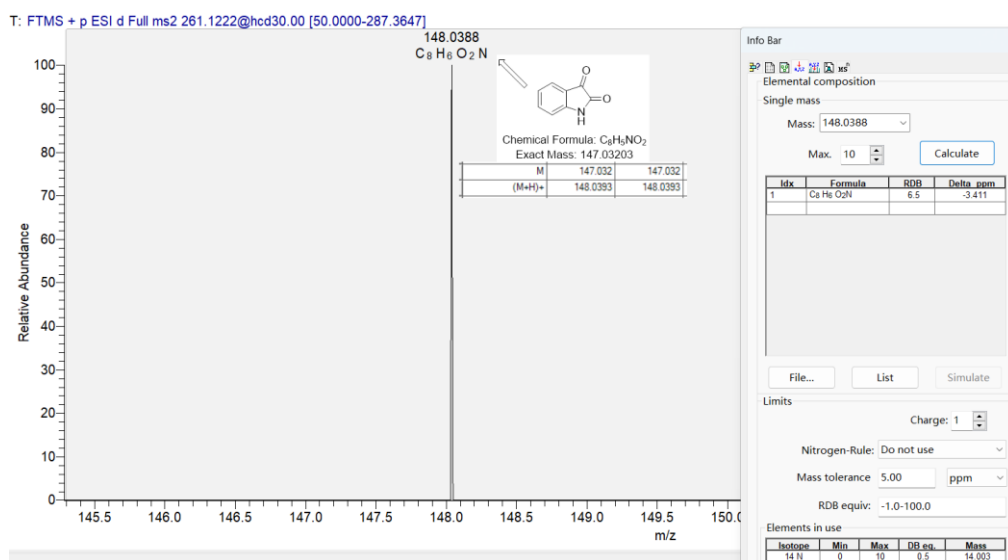

1\_20230417102440 #1153 RT: 2.27 AV: 1 NL: 1.54E5  
T: FTMS + p ESI Full ms [240.0000-2000.0000]

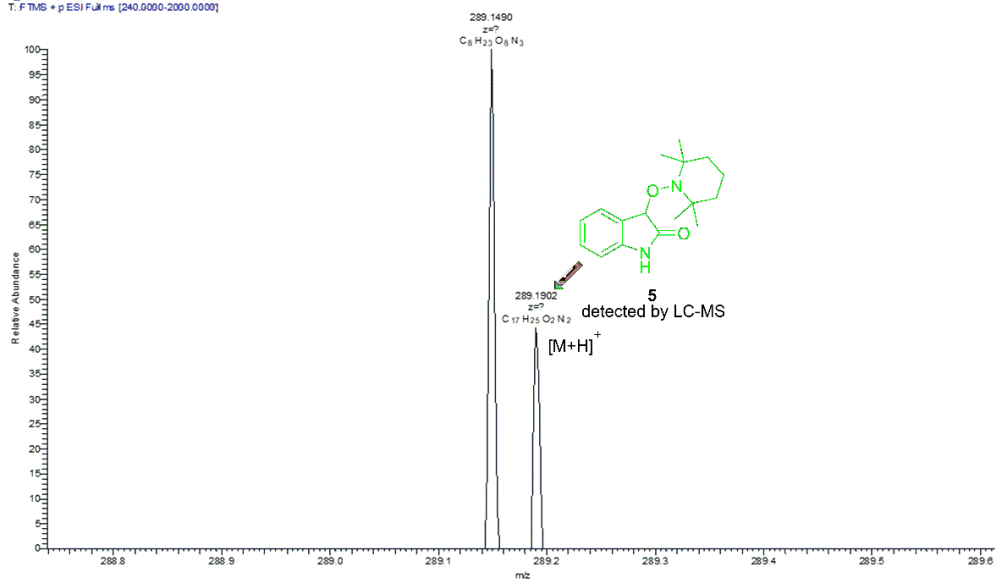

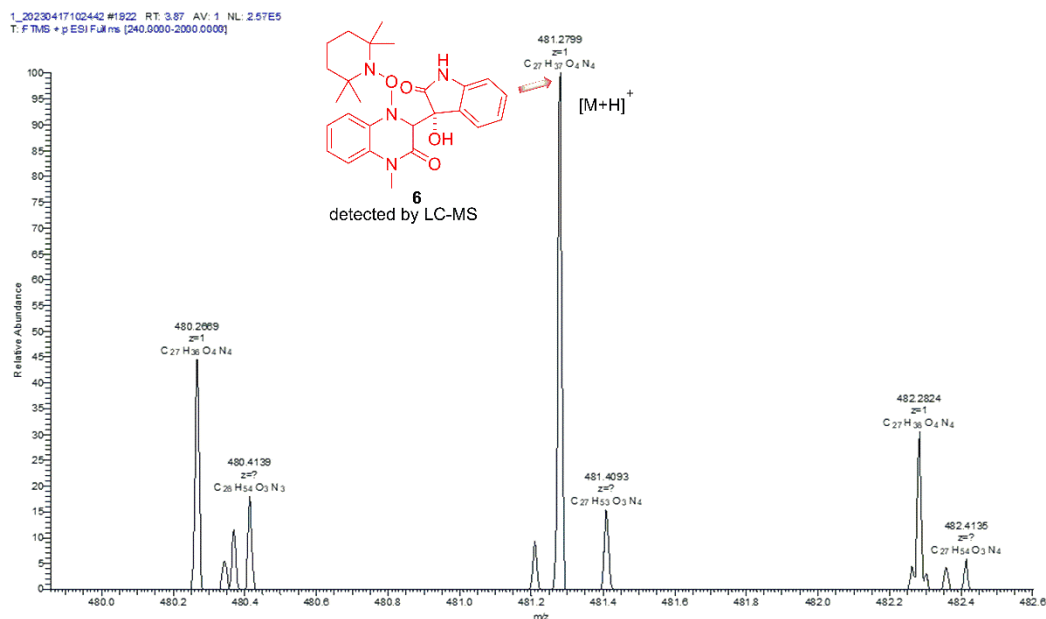

Figure S2. HRMS analysis of the adduct **1a'**, **5** and **6**

## 4. Characterization of products

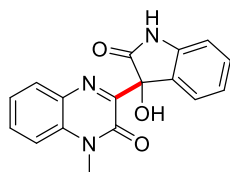

**3-Hydroxy-3-(1-methylquinoxalin-2-one) indolin-2-one (3a)** was purified by silica column with dichloromethane/methanol = 100:0-100:1, orange solid, 51.6 mg, 83% yield;

**<sup>1</sup>H NMR (300 MHz, DMSO-*d*<sub>6</sub>):**  $\delta$  = 10.50 (s, 1H, NH), 8.02 (d,  $J$  = 8.00 Hz, 1H, ArH), 7.71 (t,  $J$  = 7.88 Hz, 1H, ArH), 7.61 (d,  $J$  = 8.36 Hz, 1H, ArH), 7.49 (d,  $J$  = 7.64 Hz, 1H, ArH), 7.18-7.24 (m, 1H, ArH), 6.94 (d,  $J$  = 5.5 Hz, 1H, ArH), 6.82-6.88 (m, 2H, ArH), 6.64 (s, 1H, OH), 3.54 (s, 3H, NCH<sub>3</sub>);

**<sup>13</sup>C NMR (75 MHz, DMSO-*d*<sub>6</sub>):**  $\delta$  = 176.27, 156.24, 152.43, 144.48, 133.71, 131.69, 131.54, 130.73, 130.00, 129.88, 124.40, 123.98, 121.78, 115.48, 110.13, 77.85, 29.25;

**HRMS (ESI-TOF)** calcd for C<sub>17</sub>H<sub>14</sub>N<sub>3</sub>O<sub>3</sub> [M + H]<sup>+</sup>: 308.1030; found: 308.1036.

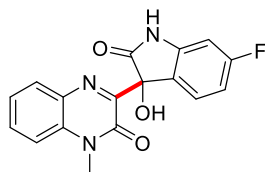

**6-Fluoro-3-hydroxy-3-(1-methylquinoxalin-2-one) indolin-2-one (3b)** was purified by silica column with dichloromethane/methanol = 100:0-100:1, orange solid, 36.8 mg, 54% yield;

**<sup>1</sup>H NMR (400 MHz, DMSO-*d*<sub>6</sub>):**  $\delta$  = 10.69 (s, 1H, NH), 8.01 (dd,  $J$  = 1.52, 8.01 Hz, 1H, ArH), 7.71 (dt,  $J$  = 1.52, 7.84 Hz, 1H, ArH), 7.61 (d,  $J$  = 8.51 Hz, 1H, ArH), 7.48 (t,  $J$  = 8.32 Hz, 1H, ArH), 6.96-6.98 (m, 1H, ArH), 6.75 (s, 1H, OH), 6.68-6.71 (m, 1H, ArH), 6.60-6.65 (m, 1H, ArH), 3.54 (s, 3H, NCH<sub>3</sub>);

**<sup>13</sup>C NMR (100 MHz, DMSO-*d*<sub>6</sub>):**  $\delta$  = 176.56, 162.30-164.71 (d,  $J_{C-F}$  = 241.42 Hz), 155.94, 152.45, 146.20-146.32 (d,  $J_{C-F}$  = 12.63 Hz), 133.69, 131.72, 131.57, 129.90, 126.67-126.70 (d,  $J_{C-F}$  = 2.72 Hz), 124.42, 120.93-121.26 (d,  $J_{C-F}$  = 32.73 Hz), 115.49, 107.58-107.80 (d,  $J_{C-F}$  = 22.17 Hz), 98.26-98.53 (d,  $J_{C-F}$  = 27.11 Hz), 77.33, 29.28;

**HRMS (ESI-TOF)** calcd for C<sub>17</sub>H<sub>13</sub>FN<sub>3</sub>O<sub>3</sub> [M + H]<sup>+</sup>: 326.0935; found: 326.0931.

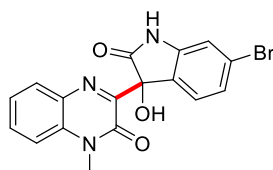

**6-Bromo-3-hydroxy-3-(1-methylquinoxalin-2-one) indolin-2-one (3c)** was purified by silica column with dichloromethane/methanol = 100:0-100:1, orange solid, 34.7 mg, 45% yield;

**<sup>1</sup>H NMR (400 MHz, DMSO-*d*<sub>6</sub>):**  $\delta$  = 10.68 (s, 1H, NH), 8.01 (dd,  $J$  = 1.52, 8.01 Hz, 1H, ArH), 7.72 (dt,  $J$  = 1.61, 7.84 Hz, 1H, ArH), 7.61 (dd,  $J$  = 1.32, 8.54 Hz, 1H, ArH), 7.49 (dt,  $J$  = 1.22, 7.63 Hz, 1H, ArH), 7.00-7.02 (m, 1H, ArH), 6.96-6.98 (m, 1H, ArH), 6.91 (d,  $J$  = 7.82 Hz, 1H, ArH), 6.81 (s, 1H, OH), 3.54 (s, 3H, NCH<sub>3</sub>);

**<sup>13</sup>C NMR (100 MHz, DMSO-*d*<sub>6</sub>):**  $\delta$  = 176.08, 155.71, 152.46, 146.14, 133.69, 131.77, 131.64, 130.09, 129.93, 125.82, 124.47, 124.39, 122.63, 115.54, 112.92, 77.44, 29.30;

**HRMS (ESI-TOF)** calcd for C<sub>17</sub>H<sub>13</sub>BrN<sub>3</sub>O<sub>3</sub> [M + H]<sup>+</sup>: 386.0135; found: 386.0147.

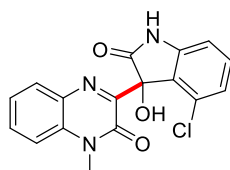

**4-Chloro-3-hydroxy-3-(1-methylquinoxalin-2-one) indolin-2-one (3d)** was purified by silica column with dichloromethane/methanol = 100:0-100:1, yellow solid, 27.1 mg, 42% yield;

**<sup>1</sup>H NMR (400 MHz, DMSO-*d*<sub>6</sub>):**  $\delta$  = 10.89 (s, 1H, NH), 7.91 (brs, 1H, ArH), 7.70 (t,  $J$  = 7.62 Hz, 1H, ArH), 7.61 (d,  $J$  = 7.24 Hz, 1H, ArH), 7.43 (brs, 1H, ArH), 7.25 (t,  $J$  = 8.03 Hz, 1H, ArH), 6.93 (d,  $J$  = 8.31 Hz, 1H, ArH), 6.89 (d,  $J$  = 7.72 Hz, 1H, ArH), 5.00 (brs, 1H, OH), 3.61 (s, 3H, NCH<sub>3</sub>);

**<sup>13</sup>C NMR (100 MHz, DMSO-*d*<sub>6</sub>):**  $\delta$  = 174.67, 155.48, 145.69, 133.60, 132.36, 131.57, 130.35, 129.85, 129.20, 124.38, 121.92, 115.53, 108.79, 29.60;

**HRMS (ESI-TOF)** calcd for C<sub>17</sub>H<sub>13</sub>ClN<sub>3</sub>O<sub>3</sub> [M + H]<sup>+</sup>: 342.0640; found: 342.0637.

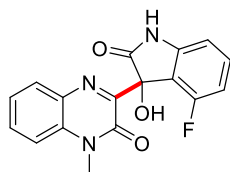

**4-Fluoro-3-hydroxy-3-(1-methylquinoxalin-2-one) indolin-2-one (3e)** was purified by silica column with dichloromethane/methanol = 100:0-100:1, yellow solid, 37.4 mg, 56% yield;

**<sup>1</sup>H NMR (400 MHz, DMSO-*d*<sub>6</sub>):**  $\delta$  = 10.77 (s, 1H, NH), 8.03 (dd,  $J$  = 1.53, 8.02 Hz, 1H, ArH), 7.74 (td,  $J$  = 7.81, 1.54 Hz, 1H, ArH), 7.64 (d,  $J$  = 8.00 Hz, 1H, ArH), 7.51 (t,  $J$  = 8.21 Hz, 1H, ArH), 7.25-7.31 (m, 1H, ArH), 6.97-6.98 (m, 1H, ArH), 6.81 (s, 1H, OH), 6.75 (d,  $J$  = 7.62 Hz, 1H, ArH), 6.65 (t,  $J$  = 8.92 Hz, 1H, ArH), 3.57 (s, 3H, NCH<sub>3</sub>);

**<sup>13</sup>C NMR (100 MHz, DMSO-*d*<sub>6</sub>):**  $\delta$  = 175.65, 157.22-159.68 (d,  $J_{C-F}$  = 245.32 Hz), 154.84, 152.40, 146.67-146.75 (d,  $J_{C-F}$  = 8.72 Hz), 133.67, 132.15-132.24 (d,  $J_{C-F}$  = 9.02 Hz), 131.77, 131.58, 129.91, 124.56, 116.16-116.36 (d,  $J_{C-F}$  = 19.33 Hz), 115.62, 109.21-109.41 (d,  $J_{C-F}$  = 20.00 Hz), 106.80-106.83 (d,  $J_{C-F}$  = 2.92 Hz), 76.83, 29.34;

**HRMS (ESI-TOF)** calcd for C<sub>17</sub>H<sub>13</sub>FN<sub>3</sub>O<sub>3</sub> [M + H]<sup>+</sup>: 326.0935; found: 326.0933.

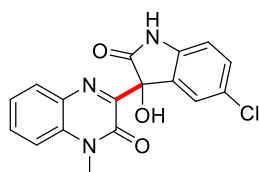

**5-Chloro-3-hydroxy-3-(1-methylquinoxalin-2-one) indolin-2-one (3f)** was purified by silica column with dichloromethane/methanol = 100:0-100:1, yellow solid, 38.2 mg, 53% yield;

**<sup>1</sup>H NMR (400 MHz, DMSO-*d*<sub>6</sub>):**  $\delta$  = 10.67 (s, 1H, NH), 8.01 (dd,  $J$  = 1.52, 8.01 Hz, 1H, ArH), 7.72 (dt,  $J$  = 1.62, 7.83 Hz, 1H, ArH), 7.62 (dd,  $J$  = 1.22, 8.52 Hz, 1H, ArH), 7.49 (dt,  $J$  = 1.21, 7.63 Hz, 1H, ArH), 7.28 (dd,  $J$  = 2.22, 8.34 Hz, 1H, ArH), 6.98-6.99 (m, 1H, ArH), 6.90 (d,  $J$  = 8.21 Hz, 1H, ArH), 6.84 (s, 1H, OH), 3.55 (s, 3H, NCH<sub>3</sub>);

**<sup>13</sup>C NMR (100 MHz, DMSO-*d*<sub>6</sub>):**  $\delta$  = 175.92, 155.57, 152.52, 143.35, 133.80, 132.76, 131.81, 131.61, 129.95, 129.72, 125.63, 124.40, 124.19, 115.51, 111.53, 77.81, 29.31;

**HRMS (ESI-TOF)** calcd for C<sub>17</sub>H<sub>13</sub>ClN<sub>3</sub>O<sub>3</sub> [M + H]<sup>+</sup>: 342.0640; found: 342.0648.

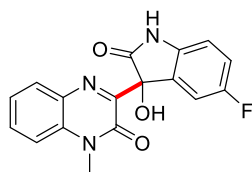

**5-Fluoro-3-hydroxy-3-(1-methylquinoxalin-2-one) indolin-2-one (3g)** was purified by silica column with dichloromethane/methanol = 100:0-100:1, yellow solid, 42.4 mg, 65% yield;

**<sup>1</sup>H NMR (400 MHz, DMSO-*d*<sub>6</sub>):**  $\delta$  = 10.54 (s, 1H, NH), 8.01 (dd,  $J$  = 1.51, 8.00 Hz, 1H, ArH),

7.72 (td,  $J = 7.82, 1.52$  Hz, 1H, ArH), 7.60 (dd,  $J = 8.53, 1.31$  Hz, 1H, ArH), 7.50 (td,  $J = 7.62, 1.23$  Hz, 1H, ArH), 7.03-7.09 (m, 1H, ArH), 6.87 (t,  $J = 4.22$  Hz, 1H, ArH), 6.84 (dd,  $J = 2.31, 2.94$  Hz, 1H, ArH), 6.79 (s, 1H, OH), 3.55 (s, 3H, NCH<sub>3</sub>);

**<sup>13</sup>C NMR (100 MHz, DMSO-*d*<sub>6</sub>):**  $\delta = 176.19, 156.97$ - $159.32$  (d,  $J_{C-F} = 235.52$  Hz), 155.66, 152.49, 140.65- $140.67$  (d,  $J_{C-F} = 1.82$  Hz), 133.78, 132.31- $132.39$  (d,  $J_{C-F} = 7.73$  Hz), 131.74, 131.60, 129.93, 124.38, 115.90- $116.13$  (d,  $J_{C-F} = 23.02$  Hz), 115.47, 111.82- $112.07$  (d,  $J_{C-F} = 24.52$  Hz), 110.73- $110.81$  (d,  $J_{C-F} = 7.71$  Hz), 78.04- $78.06$  (d,  $J_{C-F} = 1.62$  Hz), 29.28;

**HRMS (ESI-TOF)** calcd for C<sub>17</sub>H<sub>13</sub>FN<sub>3</sub>O<sub>3</sub> [M + H]<sup>+</sup>: 326.0935; found: 326.0937.

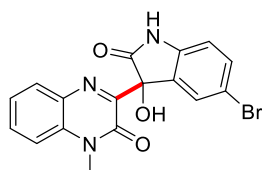

**5-Bromo-3-hydroxy-3-(1-methylquinoxalin-2-one) indolin-2-one (3h)** was purified by silica column with dichloromethane/methanol = 100:0-100:1, orange solid, 37.4 mg, 48% yield;

**<sup>1</sup>H NMR (400 MHz, DMSO-*d*<sub>6</sub>):**  $\delta = 10.69$  (s, 1H, NH), 8.01 (dd,  $J = 1.51, 8.02$  Hz, 1H, ArH), 7.72 (dt,  $J = 1.62, 7.81$  Hz, 1H, ArH), 7.62 (dd,  $J = 1.21, 8.43$  Hz, 1H, ArH), 7.49 (dt,  $J = 1.23, 7.62$  Hz, 1H, ArH), 7.41 (dd,  $J = 2.12, 8.31$  Hz, 1H, ArH), 7.10 (d,  $J = 2.11$  Hz, 1H, ArH), 6.97-6.98 (m, 1H, ArH), 6.84 (s, 1H, OH), 3.55 (s, 3H, NCH<sub>3</sub>);

**<sup>13</sup>C NMR (100 MHz, DMSO-*d*<sub>6</sub>):**  $\delta = 175.80, 155.57, 152.52, 143.76, 133.79, 133.15, 132.58, 131.82, 131.61, 129.95, 126.85, 124.40, 115.50, 113.29, 112.11, 77.76, 29.32$ ;

**HRMS (ESI-TOF)** calcd for C<sub>17</sub>H<sub>13</sub>BrN<sub>3</sub>O<sub>3</sub> [M + H]<sup>+</sup>: 386.0135; found: 386.0143.

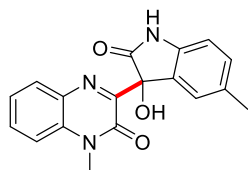

**5-Methyl-3-hydroxy-3-(1-methylquinoxalin-2-one) indolin-2-one (3i)** was purified by silica column with dichloromethane/methanol = 100:0-100:1, yellow solid, 23.1 mg, 35% yield;

**<sup>1</sup>H NMR (400 MHz, DMSO-*d*<sub>6</sub>):**  $\delta = 10.41$  (s, 1H, NH), 8.01 (dd,  $J = 1.52, 8.01$  Hz, 1H, ArH), 7.70 (dt,  $J = 7.82, 1.64$  Hz, 1H, ArH), 7.60 (dd,  $J = 1.22, 8.54$  Hz, 1H, ArH), 7.48 (dt,  $J = 1.21, 7.63$  Hz, 1H, ArH), 7.00-7.03 (m, 1H, ArH), 6.75-6.78 (m, 2H, ArH), 6.59 (s, 1H, OH), 3.54 (s, 3H, NCH<sub>3</sub>), 2.14 (s, 3H, CH<sub>3</sub>);

**<sup>13</sup>C NMR (100 MHz, DMSO-*d*<sub>6</sub>):**  $\delta = 176.28, 156.32, 152.41, 142.01, 133.71, 131.67, 131.50, 130.78, 130.59, 130.13, 129.86, 124.62, 124.37, 115.46, 109.88, 77.94, 29.25, 20.95$ ;

**HRMS (ESI-TOF)** calcd for C<sub>18</sub>H<sub>16</sub>N<sub>3</sub>O<sub>3</sub> [M + H]<sup>+</sup>: 322.1186; found: 322.1189.

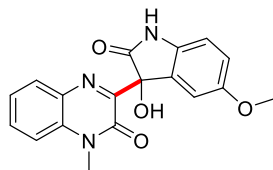

**5-Methoxy-3-hydroxy-3-(1-methylquinoxalin-2-one) indolin-2-one (3j)** was purified by silica column with dichloromethane/methanol = 100:0-100:1, yellow solid, 33.8 mg, 48% yield;

**<sup>1</sup>H NMR (400 MHz, DMSO-*d*<sub>6</sub>):**  $\delta$  = 10.33 (s, 1H, NH), 8.01 (dd,  $J$  = 1.52, 8.01 Hz, 1H, ArH), 7.71 (dt,  $J$  = 1.53, 7.82 Hz, 1H, ArH), 7.61 (dd,  $J$  = 1.22, 8.53 Hz, 1H, ArH), 7.48 (dt,  $J$  = 1.22, 7.64 Hz, 1H, ArH), 6.77 (s, 2H, ArH), 6.62 (s, 1H, OH), 6.56 (s, 1H, ArH), 3.60 (s, 3H, OCH<sub>3</sub>), 3.54 (s, 3H, NCH<sub>3</sub>);

**<sup>13</sup>C NMR (100 MHz, DMSO-*d*<sub>6</sub>):**  $\delta$  = 176.13, 156.15, 155.01, 152.44, 137.69, 133.80, 131.91, 131.69, 131.52, 129.90, 124.36, 115.48, 114.44, 110.98, 110.45, 78.25, 55.81, 29.26;

**HRMS (ESI-TOF)** calcd for C<sub>18</sub>H<sub>16</sub>N<sub>3</sub>O<sub>4</sub> [M + H]<sup>+</sup>: 338.1135; found: 338.1139.

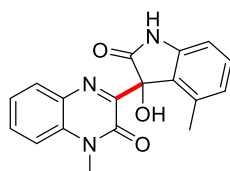

**4-Methyl-3-hydroxy-3-(1-methylquinoxalin-2-one) indolin-2-one (3k)** was purified by silica column with dichloromethane/methanol = 100:0-100:1, yellow solid, 35.2 mg, 54% yield;

**<sup>1</sup>H NMR (400 MHz, DMSO-*d*<sub>6</sub>):**  $\delta$  = 10.49 (s, 1H, NH), 7.84 (s, 1H, ArH), 7.68 (t,  $J$  = 7.77 Hz, 1H, ArH), 7.58-7.60 (d,  $J$  = 8.24 Hz, 1H, ArH), 7.42 (t,  $J$  = 7.88 Hz, 1H, ArH), 7.06-7.12 (m, 2H, ArH), 6.98 (s, 1H, OH), 6.68-6.74 (m, 2H, ArH), 3.60 (s, 3H, NCH<sub>3</sub>), 1.92 (s, 3H, CH<sub>3</sub>);

**<sup>13</sup>C NMR (100 MHz, DMSO-*d*<sub>6</sub>):**  $\delta$  = 176.22, 156.08, 152.32, 144.01, 134.16, 133.64, 132.30, 131.39, 129.71, 128.65, 128.45, 124.24, 123.39, 115.46, 109.02, 78.38, 29.29, 18.60;

**HRMS (ESI-TOF)** calcd for C<sub>18</sub>H<sub>16</sub>N<sub>3</sub>O<sub>3</sub> [M + H]<sup>+</sup>: 322.1186; found: 322.1187.

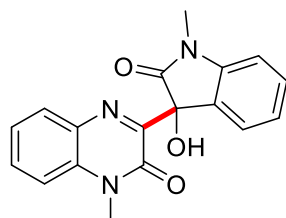

**1-Methyl-3-hydroxy-3-(1-methylquinoxalin-2-one) indolin-2-one (3l)** was purified by silica column with dichloromethane/methanol = 100:0-100:1, red solid, 22.2 mg, 34% yield;

**<sup>1</sup>H NMR (400 MHz, DMSO-*d*<sub>6</sub>):**  $\delta$  = 8.02 (dd,  $J$  = 1.5, 8.0 Hz, 1H, ArH), 7.70 (td,  $J$  = 7.93, 1.51 Hz, 1H, ArH), 7.57-7.59 (m, 1H, ArH), 7.49 (t,  $J$  = 7.61 Hz, 1H, ArH), 7.32 (td,  $J$  = 7.72, 1.33 Hz, 1H, ArH), 7.00-7.06 (m, 2H, ArH), 6.92 (t,  $J$  = 7.54 Hz, 1H, ArH), 3.51 (s, 3H, NCH<sub>3</sub>), 3.20 (s, 3H,

NCH<sub>3</sub>);

**<sup>13</sup>C NMR (100 MHz, DMSO-*d*<sub>6</sub>):**  $\delta$  = 174.71, 156.10, 152.38, 145.81, 133.68, 131.73, 131.58, 130.15, 129.90, 129.81, 124.43, 123.65, 122.50, 115.36, 109.04, 77.43, 29.03, 26.65;

**HRMS (ESI-TOF)** calcd for C<sub>18</sub>H<sub>16</sub>N<sub>3</sub>O<sub>3</sub> [M + H]<sup>+</sup>: 322.1186; found: 322.1188.

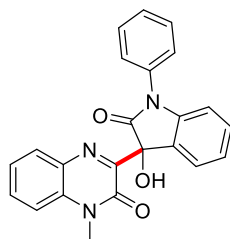

**1-Phenyl-3-hydroxy-3-(1-methylquinoxalin-2-one) indolin-2-one (3m)** was purified by silica column with dichloromethane/methanol = 100:0-100:1, pale solid, 40.4 mg, 54% yield;

**<sup>1</sup>H NMR (400 MHz, DMSO-*d*<sub>6</sub>):**  $\delta$  = 8.06 (dd, *J* = 1.52, 8.02 Hz, 1H, ArH), 7.73 (td, *J* = 7.81, 1.54 Hz, 1H, ArH), 7.61-7.65 (m, 3H, ArH), 7.47-7.55 (m, 4H, ArH), 7.27 (td, *J* = 7.82, 1.42 Hz, 1H, ArH), 7.12 (dd, *J* = 7.44, 1.32 Hz, 1H, ArH), 6.98 (t, *J* = 7.52 Hz, 1H, ArH), 6.78 (d, *J* = 7.84 Hz, 1H, ArH), 3.58 (s, 3H, NCH<sub>3</sub>);

**<sup>13</sup>C NMR (100 MHz, DMSO-*d*<sub>6</sub>):**  $\delta$  = 174.29, 156.15, 152.64, 145.62, 135.12, 133.68, 131.87, 131.69, 130.23, 130.12, 130.00, 129.51, 128.49, 127.08, 124.53, 124.39, 123.14, 115.59, 109.52, 77.51, 29.47;

**HRMS (ESI-TOF)** calcd for C<sub>23</sub>H<sub>18</sub>N<sub>3</sub>O<sub>3</sub> [M + H]<sup>+</sup>: 384.1343; found: 384.1347.

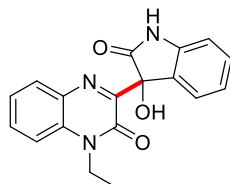

**3-Hydroxy-3-(1-ethylquinoxalin-2-one) indolin-2-one (3ab)** was purified by silica column with dichloromethane/methanol = 100:0-100:1, pale solid, 49.2 mg, 75% yield;

**<sup>1</sup>H NMR (400 MHz, DMSO-*d*<sub>6</sub>):**  $\delta$  = 10.50 (s, 1H, NH), 8.02 (d, *J* = 8.12 Hz, 1H, ArH), 7.65-7.73 (m, 2H, ArH), 7.48 (t, *J* = 8.32 Hz, 1H, ArH), 7.22 (t, *J* = 6.62 Hz, 1H, ArH), 6.98 (d, *J* = 7.41 Hz, 1H, ArH), 6.82-6.88 (m, 2H, ArH), 6.65 (brs, 1H, OH), 4.13-4.19 (m, 2H, NCH<sub>2</sub>), 1.13 (t, *J* = 7.1 Hz, 3H, CH<sub>3</sub>);

**<sup>13</sup>C NMR (100 MHz, DMSO-*d*<sub>6</sub>):**  $\delta$  = 176.26, 156.22, 152.01, 144.45, 132.50, 131.96, 131.64, 130.77, 130.22, 130.00, 124.31, 123.96, 121.82, 115.13, 110.16, 77.83, 37.21, 12.79;

**HRMS (ESI-TOF)** calcd for C<sub>18</sub>H<sub>16</sub>N<sub>3</sub>O<sub>3</sub> [M + H]<sup>+</sup>: 322.1186; found: 322.1189.

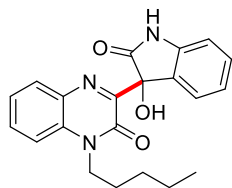

**3-Hydroxy-3-(1-pentylquinoxalin-2-one) indolin-2-one (3ac)** was purified by silica column with dichloromethane/methanol = 100:0-100:1, orange solid, 39.8 mg, 54% yield;

**<sup>1</sup>H NMR (400 MHz, DMSO-*d*<sub>6</sub>):**  $\delta$  = 10.50 (s, 1H, NH), 8.02 (dd,  $J$  = 1.51, 8.04 Hz, 1H, ArH), 7.68-7.72 (m, 1H, ArH), 7.63-7.65 (m, 1H, ArH), 7.47 (td,  $J$  = 7.52, 1.31 Hz, 1H, ArH), 7.22 (td,  $J$  = 7.71, 1.31 Hz, 1H, ArH), 6.96 (d,  $J$  = 7.43 Hz, 1H, ArH), 6.88 (d,  $J$  = 7.72 Hz, 1H, ArH), 6.83 (t,  $J$  = 7.50 Hz, 1H, ArH), 6.62 (brs, 1H, OH), 4.08-4.13 (m, 2H, NCH<sub>2</sub>), 1.50-1.54 (m, 2H, NCH<sub>2</sub>CH<sub>2</sub>), 1.23-1.24 (m, 4H, NCH<sub>2</sub>CH<sub>2</sub>CH<sub>2</sub>CH<sub>2</sub>), 0.79 (t,  $J$  = 6.62 Hz, 3H, CH<sub>3</sub>);

**<sup>13</sup>C NMR (100 MHz, DMSO-*d*<sub>6</sub>):**  $\delta$  = 176.25, 156.21, 152.25, 144.46, 132.69, 131.94, 131.60, 130.77, 130.19, 129.97, 124.30, 123.89, 121.78, 115.26, 110.16, 77.83, 41.83, 28.71, 26.99, 22.20, 14.33;

**HRMS (ESI-TOF)** calcd for C<sub>21</sub>H<sub>22</sub>N<sub>3</sub>O<sub>3</sub> [M + H]<sup>+</sup>: 364.1656; found: 364.1652.

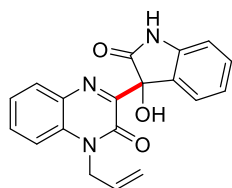

**3-Hydroxy-3-(1-allylquinoxalin-2-one) indolin-2-one (3ad)** was purified by silica column with dichloromethane/methanol = 100:0-100:1, red solid, 38.4 mg, 55% yield;

**<sup>1</sup>H NMR (400 MHz, DMSO-*d*<sub>6</sub>):**  $\delta$  = 10.50 (s, 1H, NH), 8.02 (d,  $J$  = 8.02 Hz, 1H, ArH), 7.67 (t,  $J$  = 8.02 Hz, 1H, ArH), 7.55 (d,  $J$  = 8.43 Hz, 1H, ArH), 7.47 (t,  $J$  = 7.62 Hz, 1H, ArH), 7.22 (t,  $J$  = 7.72 Hz, 1H, ArH), 6.99 (d,  $J$  = 7.22 Hz, 1H, ArH), 6.82-6.99 (m, 2H, ArH), 6.66 (brs, 1H, OH), 5.78-5.86 (m, 1H, CH=CH<sub>2</sub>), 5.13 (d,  $J$  = 10.72 Hz, 1H, CH=CH<sub>2</sub>), 4.94 (d,  $J$  = 17.22 Hz, 1H, CH=CH<sub>2</sub>), 4.78-4.79 (m, 2H, NCH<sub>2</sub>);

**<sup>13</sup>C NMR (100 MHz, DMSO-*d*<sub>6</sub>):**  $\delta$  = 176.23, 156.33, 152.09, 144.46, 132.73, 131.88, 131.64, 131.48, 130.74, 130.09, 130.02, 124.44, 123.95, 121.83, 117.71, 115.71, 110.17, 77.88, 44.03;

**HRMS (ESI-TOF)** calcd for C<sub>19</sub>H<sub>16</sub>N<sub>3</sub>O<sub>3</sub> [M + H]<sup>+</sup>: 334.1186; found: 334.1187.

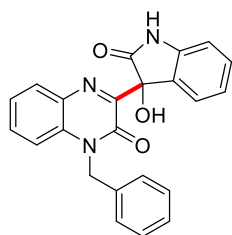

**3-Hydroxy-3-(1-benzylquinoxalin-2-one) indolin-2-one (3ae)** was purified by silica column with

dichloromethane/methanol = 100:0-100:1, red solid, 57.2 mg, 72% yield;

**<sup>1</sup>H NMR (400 MHz, DMSO-*d*<sub>6</sub>):**  $\delta$  = 10.48 (s, 1H, NH), 8.03 (dd,  $J$  = 1.52, 7.91 Hz, 1H, ArH), 7.60 (td,  $J$  = 7.83, 1.61 Hz, 1H, ArH), 7.51 (d,  $J$  = 8.74 Hz, 1H, ArH), 7.45 (td,  $J$  = 7.60, 1.22 Hz, 1H, ArH), 7.31-7.32 (m, 1H, ArH), 7.22-7.27 (m, 4H, ArH), 7.09-7.12 (m, 1H, ArH), 7.04 (d,  $J$  = 6.64 Hz, 1H, ArH), 6.89 (d,  $J$  = 7.41 Hz, 2H, ArH), 6.72 (brs, 1H, OH), 5.49 d,  $J$  = 16.04 Hz, 1H, NCH<sub>2</sub>), 5.38 d,  $J$  = 15.76 Hz, 1H, NCH<sub>2</sub>);

**<sup>13</sup>C NMR (100 MHz, DMSO-*d*<sub>6</sub>):**  $\delta$  = 176.31, 156.53, 152.69, 144.50, 135.99, 132.74, 132.04, 131.53, 130.74, 130.19, 130.08, 129.17, 127.93, 127.10, 124.57, 124.00, 121.85, 115.73, 110.23, 78.01, 44.96;

**HRMS (ESI-TOF)** calcd for C<sub>23</sub>H<sub>18</sub>N<sub>3</sub>O<sub>3</sub> [M + H]<sup>+</sup>: 384.1343; found: 384.1341.

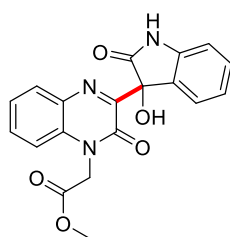

**3-Hydroxy-3-(1-methylacetatequinoxalin-2-one) indolin-2-one (3af)** was purified by silica column with dichloromethane/methanol = 100:0-100:1, orange solid, 52.6 mg, 70% yield;

**<sup>1</sup>H NMR (300 MHz, DMSO-*d*<sub>6</sub>):**  $\delta$  = 10.51 (s, 1H, NH), 8.05 (dd,  $J$  = 0.91, 4.82 Hz, 1H, ArH), 7.68 (td,  $J$  = 4.73, 0.92 Hz, 1H, ArH), 7.49-7.55 (m, 2H, ArH), 7.23 (td,  $J$  = 4.62, 0.81 Hz, 1H, ArH), 6.99 (d,  $J$  = 4.02 Hz, 1H, ArH), 6.84-6.88 (m, 2H, ArH), 6.72 (s, 1H, OH), 5.04 (d,  $J$  = 1.52 Hz, 2H, NCH<sub>2</sub>), 3.65 (s, 3H, OCH<sub>3</sub>);

**<sup>13</sup>C NMR (100 MHz, DMSO-*d*<sub>6</sub>):**  $\delta$  = 176.28, 168.70, 156.78, 152.69, 139.27, 137.77, 127.87, 125.84, 125.67, 125.64, 124.97, 124.11, 122.63, 121.14, 116.87, 115.18, 109.67, 77.15, 44.60;

**HRMS (ESI-TOF)** calcd for C<sub>19</sub>H<sub>16</sub>N<sub>3</sub>O<sub>5</sub> [M + H]<sup>+</sup>: 366.1084; found: 366.1082.

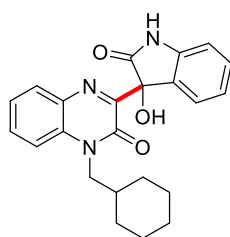

**3-Hydroxy-3-(1-cyclohexylmethylquinoxalin-2-one) indolin-2-one (3ag)** was purified by silica column with dichloromethane/methanol = 100:0-100:1, orange solid, 34.2 mg, 43% yield;

**<sup>1</sup>H NMR (400 MHz, DMSO-*d*<sub>6</sub>):**  $\delta$  = 10.49 (s, 1H, NH), 8.01 (d,  $J$  = 8.12 Hz, 1H, ArH), 7.63-7.71 (m, 2H, ArH), 7.46 (t,  $J$  = 8.12 Hz, 1H, ArH), 7.21 (t,  $J$  = 7.62 Hz, 1H, ArH), 6.93-6.98 (m, 2H, ArH and OH), 6.80-6.87 (m, 2H, ArH), 3.94-4.10 (m, 2H, CH<sub>2</sub>), 1.75 (m, 1H), 1.44-1.59 (m, 6H), 1.03-1.13 (m, 4H);

**<sup>13</sup>C NMR (100 MHz, DMSO-*d*<sub>6</sub>):**  $\delta$  = 176.26, 156.26, 152.69, 144.46, 133.06, 131.90, 131.46, 130.77, 130.17, 129.96, 124.26, 123.82, 121.71, 115.67, 110.15, 77.85, 47.20, 36.30, 30.43, 30.36, 26.35, 26.18, 25.66;

**HRMS (ESI-TOF)** calcd for C<sub>23</sub>H<sub>24</sub>N<sub>3</sub>O<sub>3</sub> [M + H]<sup>+</sup>: 390.1812; found: 390.1809.

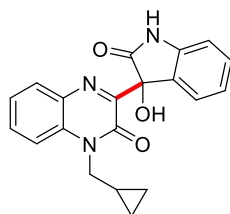

**3-Hydroxy-3-(1-cyclopropylmethylquinoxalin-2-one) indolin-2-one (3ah)** was purified by silica column with dichloromethane/methanol = 100:0-100:1, orange solid, 22.8 mg, 32% yield;

**<sup>1</sup>H NMR (400 MHz, DMSO-*d*<sub>6</sub>):**  $\delta$  = 10.51 (s, 1H, NH), 8.02 (d, *J* = 8.03 Hz, 1H, ArH), 7.68-7.75 (m, 2H, ArH), 7.48 (t, *J* = 7.51 Hz, 1H, ArH), 7.21 (t, *J* = 7.71 Hz, 1H, ArH), 6.97 (d, *J* = 7.52 Hz, 1H, ArH), 6.81-6.87 (m, 2H, ArH), 4.03-4.13 (m, 2H, CH<sub>2</sub>), 1.14-1.20 (m, 1H), 0.27-0.40 (m, 4H);

**<sup>13</sup>C NMR (100 MHz, DMSO-*d*<sub>6</sub>):**  $\delta$  = 176.26, 156.42, 152.57, 144.45, 132.95, 131.88, 131.56, 130.75, 130.16, 129.98, 124.34, 123.86, 121.78, 115.59, 110.16, 77.87, 45.63, 10.01, 4.12;

**HRMS (ESI-TOF)** calcd for C<sub>20</sub>H<sub>18</sub>N<sub>3</sub>O<sub>3</sub> [M + H]<sup>+</sup>: 348.1343; found: 348.1340.

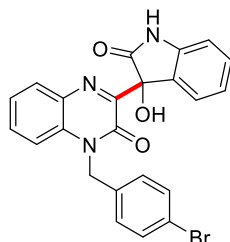

**3-Hydroxy-3-(1-(4-bromobenzyl)quinoxalin-2-one) indolin-2-one (3ai)** was purified by silica column with dichloromethane/methanol = 100:0-100:1, orange solid, 56.4 mg, 58% yield;

**<sup>1</sup>H NMR (400 MHz, DMSO-*d*<sub>6</sub>):**  $\delta$  = 10.53 (s, 1H, NH), 8.03 (dd, *J* = 1.52, 7.93 Hz, 1H, ArH), 7.62 (td, *J* = 7.84, 1.62 Hz, 1H, ArH), 7.47-7.51 (m, 4H, ArH), 7.23 (t, *J* = 7.73 Hz, 1H, ArH), 7.07 (d, *J* = 8.42 Hz, 2H, ArH), 7.03 (d, *J* = 6.84 Hz, 1H, ArH), 6.88 (d, *J* = 7.73 Hz, 1H, ArH), 6.71 (s, 1H, OH), 5.31-5.45 (m, 2H, NCH<sub>2</sub>);

**<sup>13</sup>C NMR (100 MHz, DMSO-*d*<sub>6</sub>):**  $\delta$  = 176.26, 156.51, 152.63, 144.46, 135.50, 132.63, 132.08, 131.62, 130.69, 130.25, 130.08, 129.40, 128.87, 124.67, 124.04, 121.86, 121.06, 115.64, 110.21, 77.99, 44.48;

**HRMS (ESI-TOF)** calcd for C<sub>23</sub>H<sub>17</sub>BrN<sub>3</sub>O<sub>3</sub> [M + H]<sup>+</sup>: 462.0448; found: 462.0448.

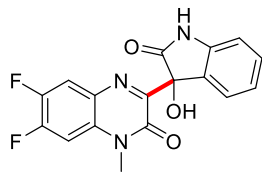

**3-Hydroxy-3-(6, 7-difluoro-1-methylquinoxalin-2-one) indolin-2-one (3aj)** was purified by silica column with dichloromethane/methanol = 100:0-100:1, pale solid, 45.1 mg, 62% yield;

**<sup>1</sup>H NMR (400 MHz, DMSO-*d*<sub>6</sub>):**  $\delta$  = 10.52 (s, 1H, NH), 8.07 (dd,  $J$  = 8.32, 10.63 Hz, 1H, ArH), 7.81 (dd,  $J$  = 7.43, 12.31 Hz, 1H, ArH), 7.22 (td,  $J$  = 7.43, 1.32 Hz, 1H, ArH), 6.95 (d,  $J$  = 7.36 Hz, 1H, ArH), 6.85 (t,  $J$  = 7.61 Hz, 1H, ArH), 6.65 (brs, 1H, OH), 3.50 (s, 3H, NCH<sub>3</sub>);

**<sup>13</sup>C NMR (100 MHz, DMSO-*d*<sub>6</sub>):**  $\delta$  = 176.09, 157.06-157.09 (d,  $J_{C-F}$  = 3.2 Hz), 152.48-152.62 and 150.00-150.14 (d,  $J_{C-F}$  = 14.0, 248.6 Hz), 152.18, 147.48-147.62 and 145.05-145.19 (d,  $J_{C-F}$  = 13.8, 242.8 Hz), 144.46, 131.53-131.63 (d,  $J_{C-F}$  = 9.8 Hz), 130.50, 130.07, 128.24-128.34 (d,  $J_{C-F}$  = 9.5 Hz), 124.08, 121.77, 117.30-117.48 (d,  $J_{C-F}$  = 17.7 Hz), 110.16, 104.62-104.85 (d,  $J_{C-F}$  = 23.3 Hz), 77.92, 30.03;

**HRMS (ESI-TOF)** calcd for C<sub>17</sub>H<sub>12</sub>F<sub>2</sub>N<sub>3</sub>O<sub>3</sub> [M + H]<sup>+</sup>: 344.0841; found: 344.0847.

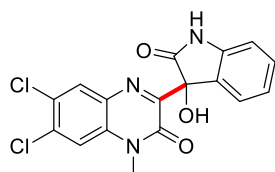

**3-Hydroxy-3-(6, 7-dichloro-1-methylquinoxalin-2-one) indolin-2-one (3ak)** was purified by silica column with dichloromethane/methanol = 100:0-100:1, light yellow solid, 36.3 mg, 47% yield;

**<sup>1</sup>H NMR (400 MHz, DMSO-*d*<sub>6</sub>):**  $\delta$  = 10.54 (s, 1H, NH), 8.20 (s, 1H, ArH), 7.93 (s, 1H, ArH), 7.22 (dt,  $J$  = 1.32, 7.61 Hz, 1H, ArH), 6.95 (dd,  $J$  = 1.31, 7.42 Hz, 1H, ArH), 6.83-6.87 (m, 2H, ArH), 6.72 (s, 1H, ArH), 3.51 (s, 3H, NCH<sub>3</sub>);

**<sup>13</sup>C NMR (100 MHz, DMSO-*d*<sub>6</sub>):**  $\delta$  = 176.00, 158.17, 152.09, 144.44, 133.78, 133.71, 131.21, 130.45, 130.40, 130.15, 126.33, 124.16, 121.81, 117.49, 110.19, 78.02, 29.76;

**HRMS (ESI-TOF)** calcd for C<sub>17</sub>H<sub>12</sub>Cl<sub>2</sub>N<sub>3</sub>O<sub>3</sub> [M + H]<sup>+</sup>: 376.0250; found: 376.0248.

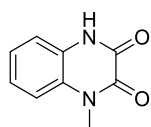

**1-Methyl-1, 4-dihydroquinoxaline-2, 3-dione (4)<sup>2</sup>** was purified by silica column with dichloromethane/methanol = 100:0-100:1, pale solid, 16.2 mg, 36% yield;

**<sup>1</sup>H NMR (400 MHz, DMSO-*d*<sub>6</sub>):**  $\delta$  = 12.02 (s, 1H, NH), 7.33-7.05 (m, 1H, ArH), 7.12-7.20 (m, 3H, ArH), 3.51 (s, 3H, NCH<sub>3</sub>).

## 5. Reference

1. W. L. F. Armarego and C. Chai, in *Purification of Laboratory Chemicals (Seventh Edition)*, Butterworth-Heinemann, Boston, 2013, DOI: <https://doi.org/10.1016/B978-0-12-382161-4.00004-2>, pp. 103-554.
2. C. Liang, Y. Guo, Y. Zhang, Z. Wang, L. Li and W. Li, *Organic Chemistry Frontiers*, 2023, **10**, 611-623.

## 6. Copies of $^1\text{H}$ NMR and $^{13}\text{C}$ NMR Spectra

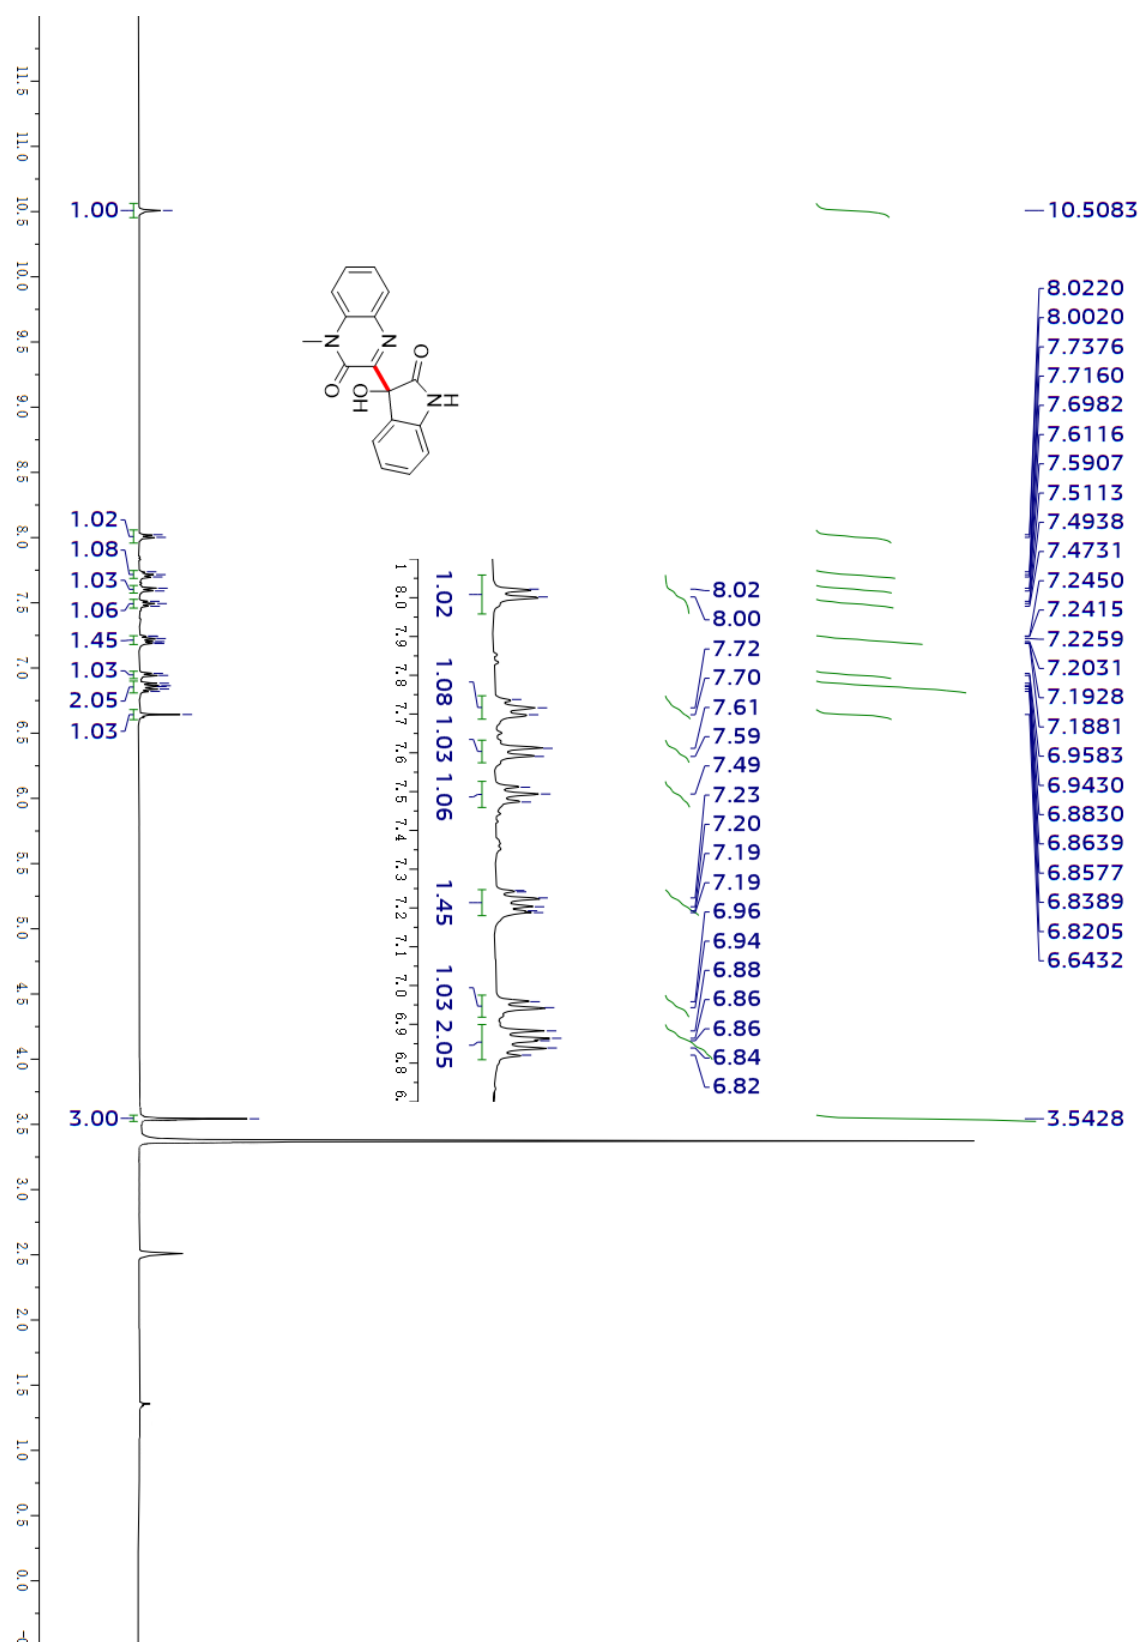

**Figure S1.** The  $^1\text{H}$  NMR Spectrum of Compound 3a in DMSO- $d_6$

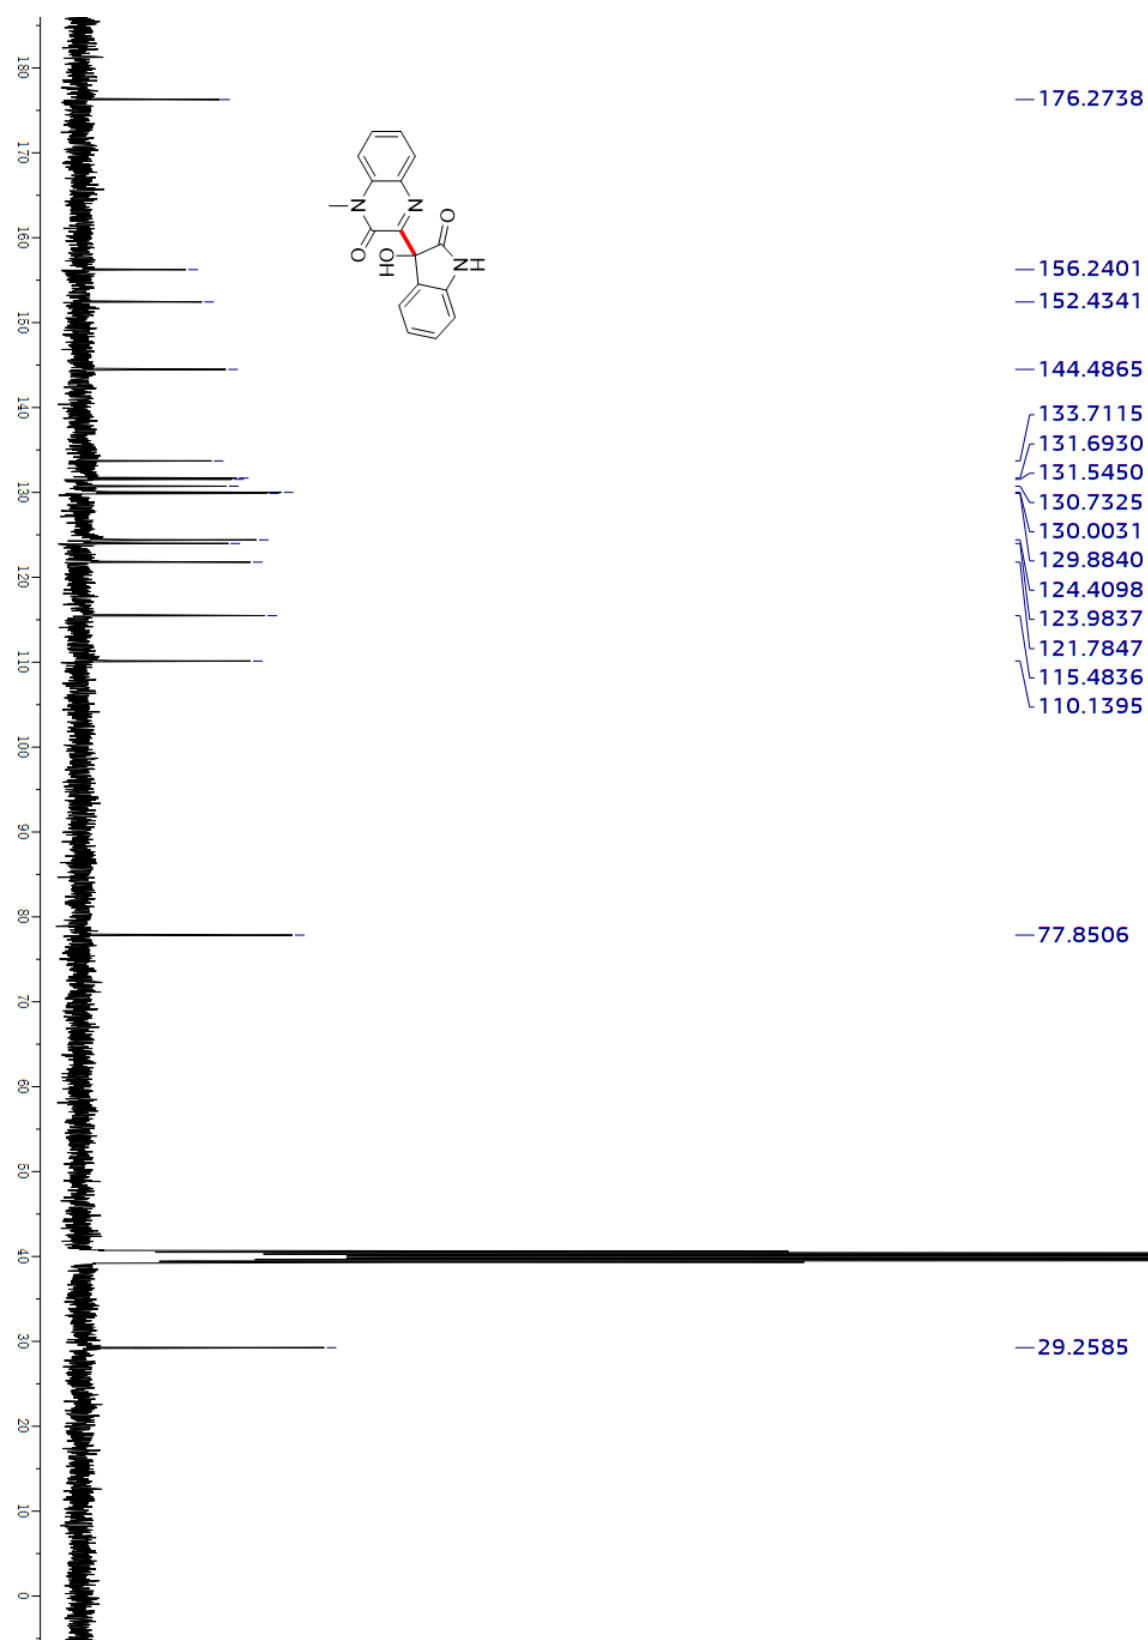

**Figure S2.** The  $^{13}\text{C}$  NMR Spectrum of Compound **3a** in  $\text{DMSO}-d_6$

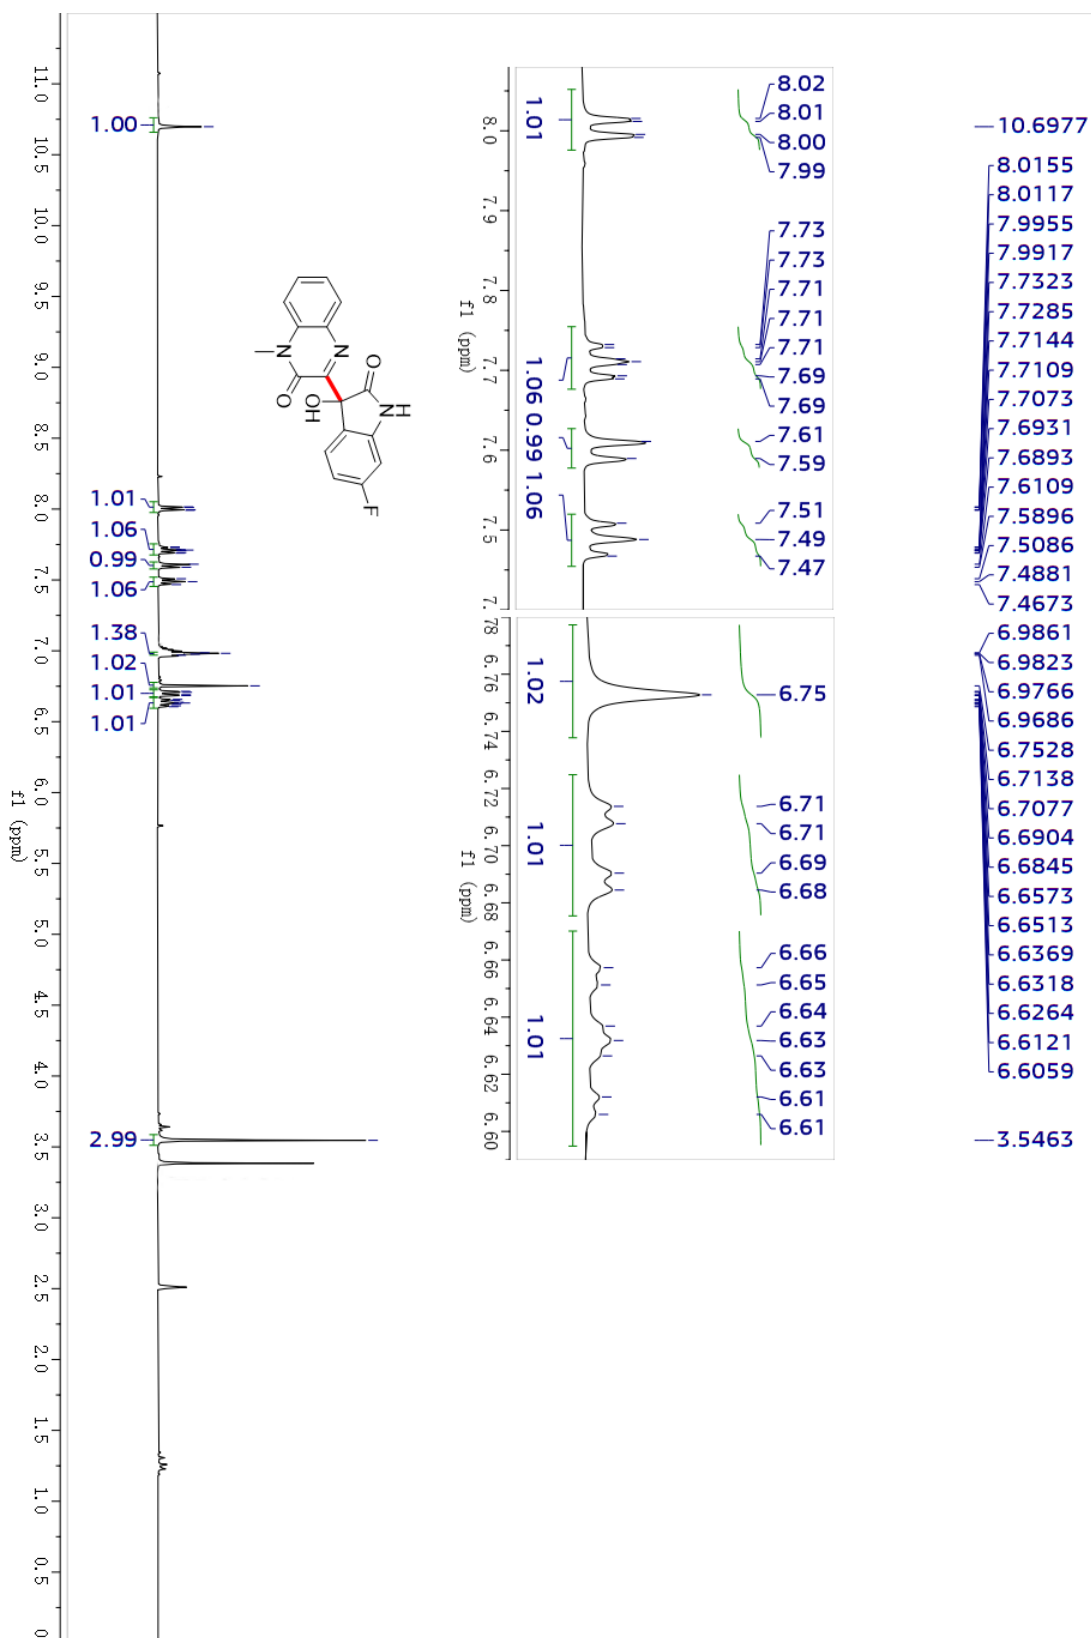

**Figure S3.** The  $^1\text{H}$  NMR Spectrum of Compound **3b** in  $\text{DMSO-}d_6$

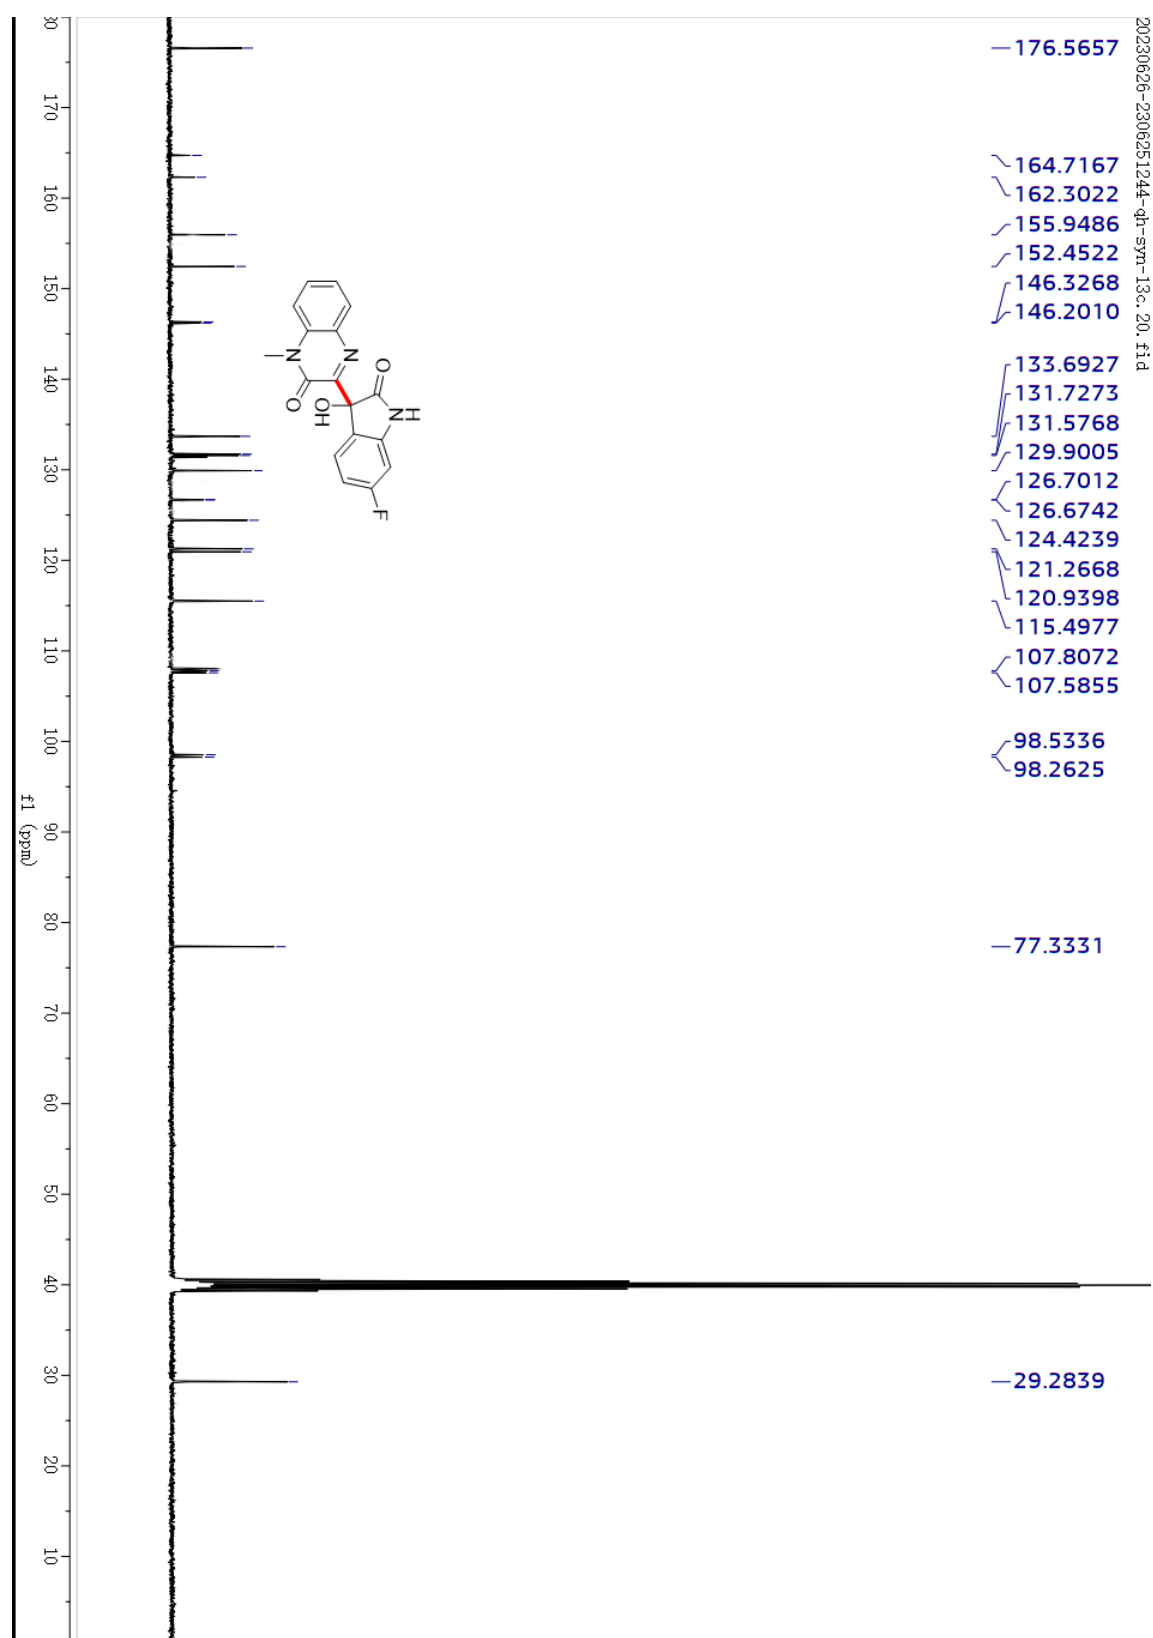

**Figure S4.** The  $^{13}\text{C}$  NMR Spectrum of Compound **3b** in  $\text{DMSO-}d_6$

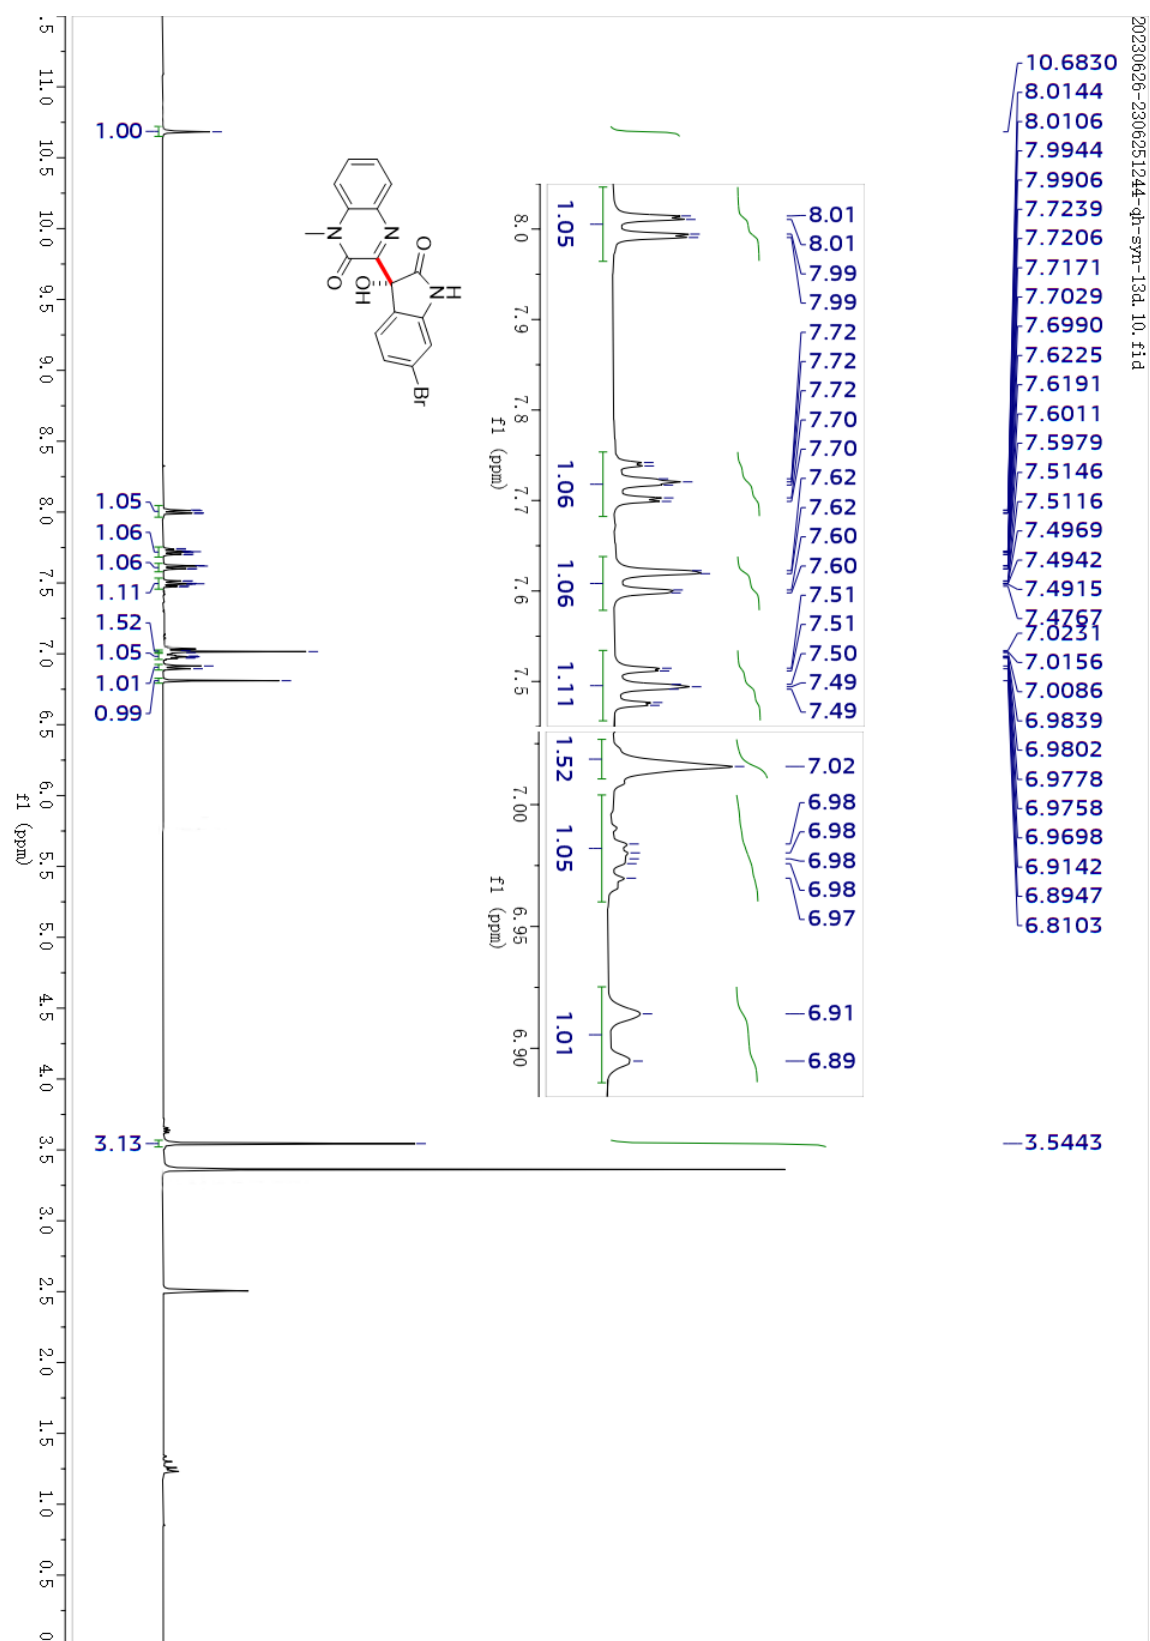

Figure S5. The  $^1\text{H}$  NMR Spectrum of Compound 3c in  $\text{DMSO-}d_6$

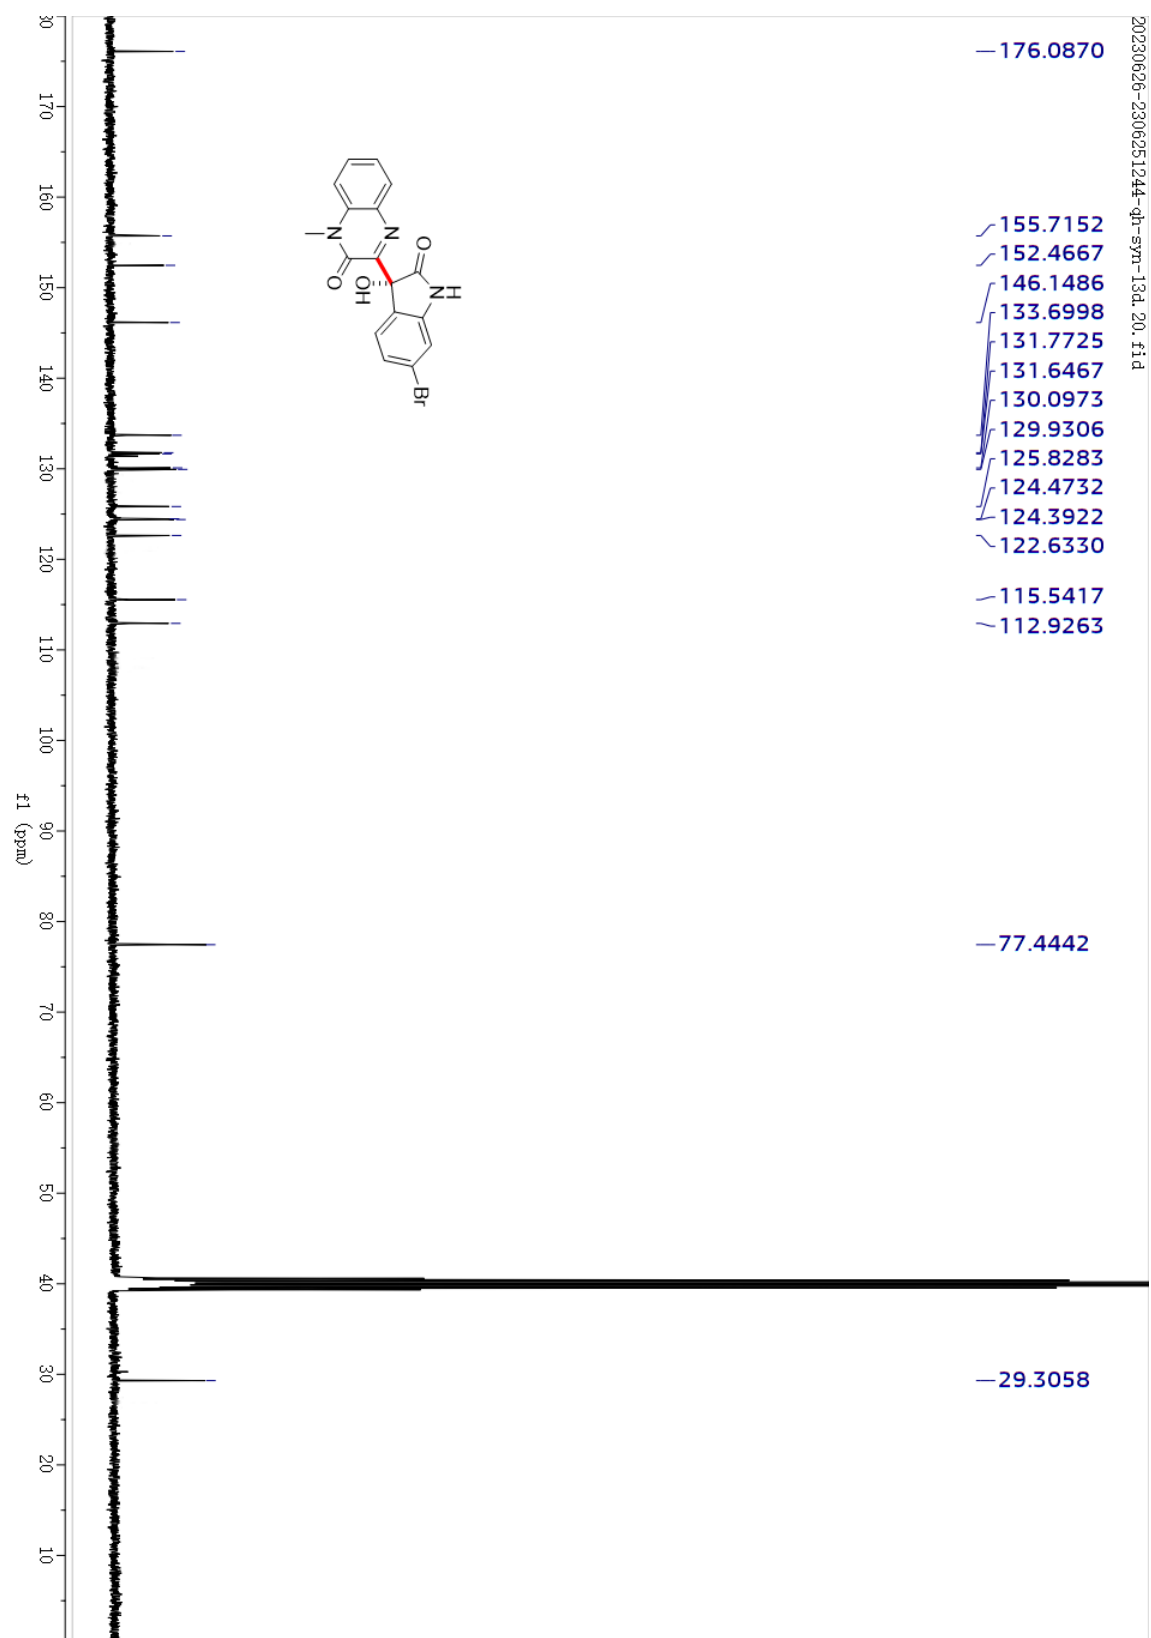

**Figure S6.** The  $^{13}\text{C}$  NMR Spectrum of Compound **3c** in  $\text{DMSO-}d_6$

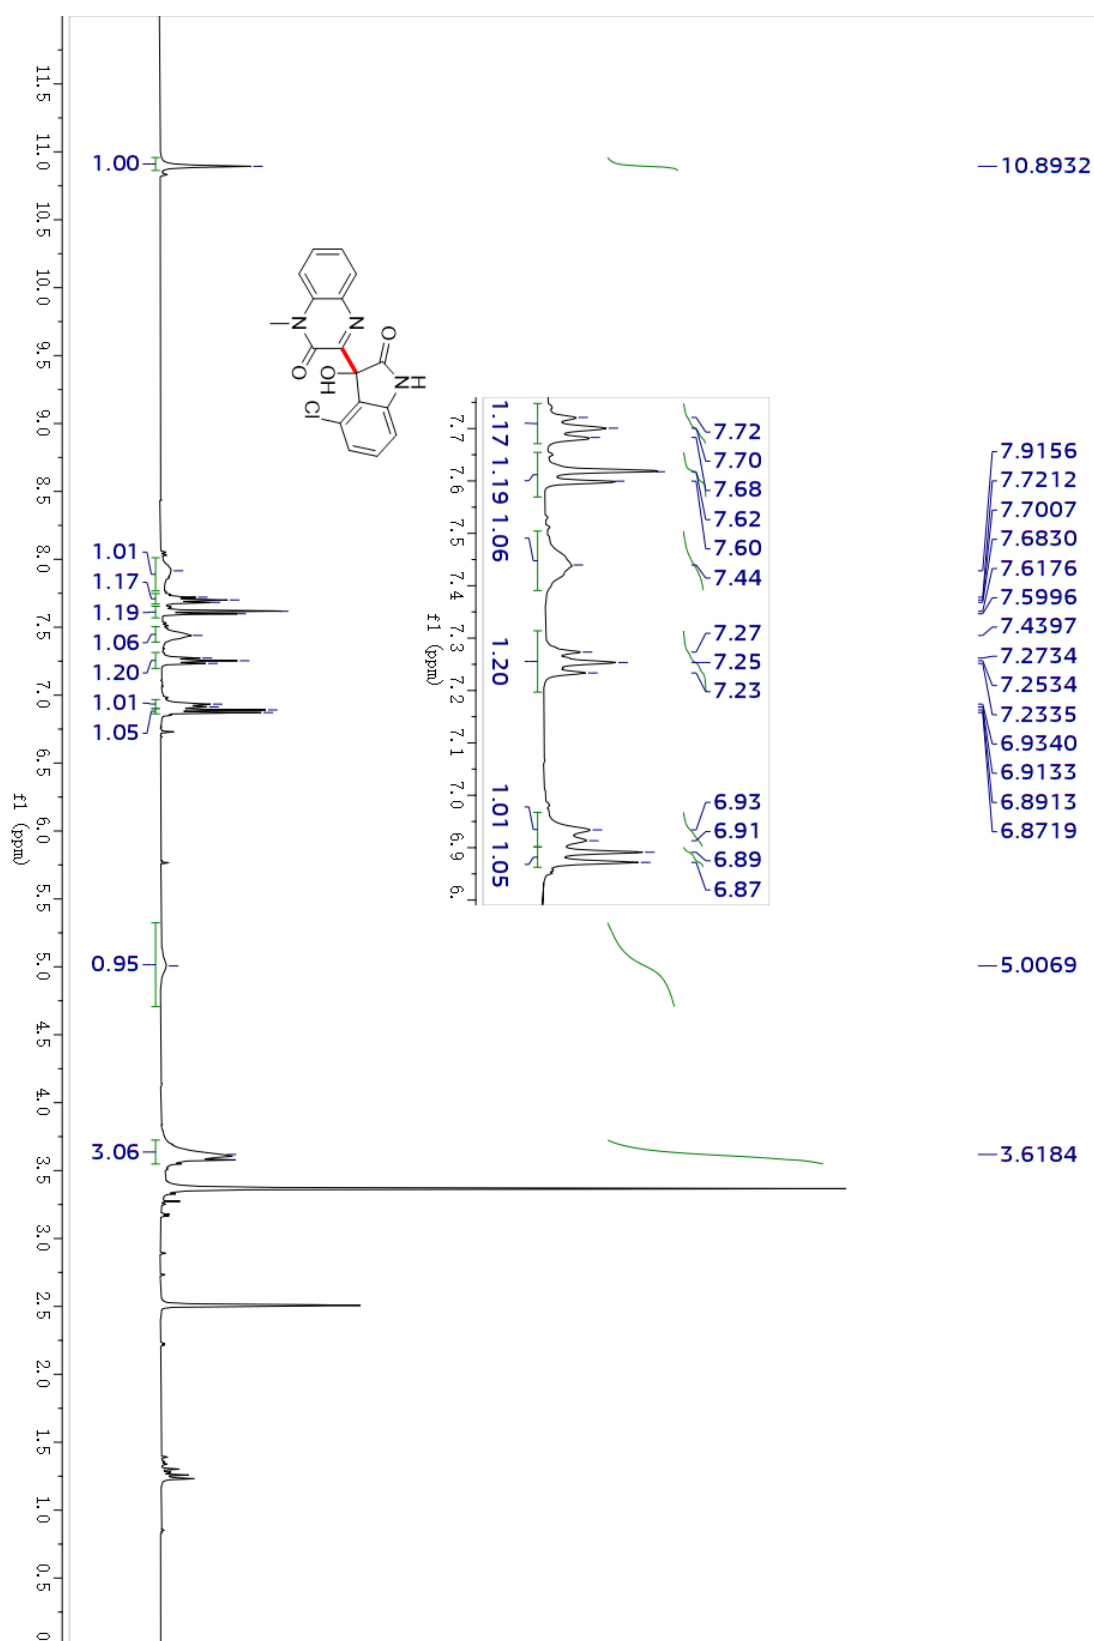

**Figure S7.** The <sup>1</sup>H NMR Spectrum of Compound **3d** in DMSO-*d*<sub>6</sub>

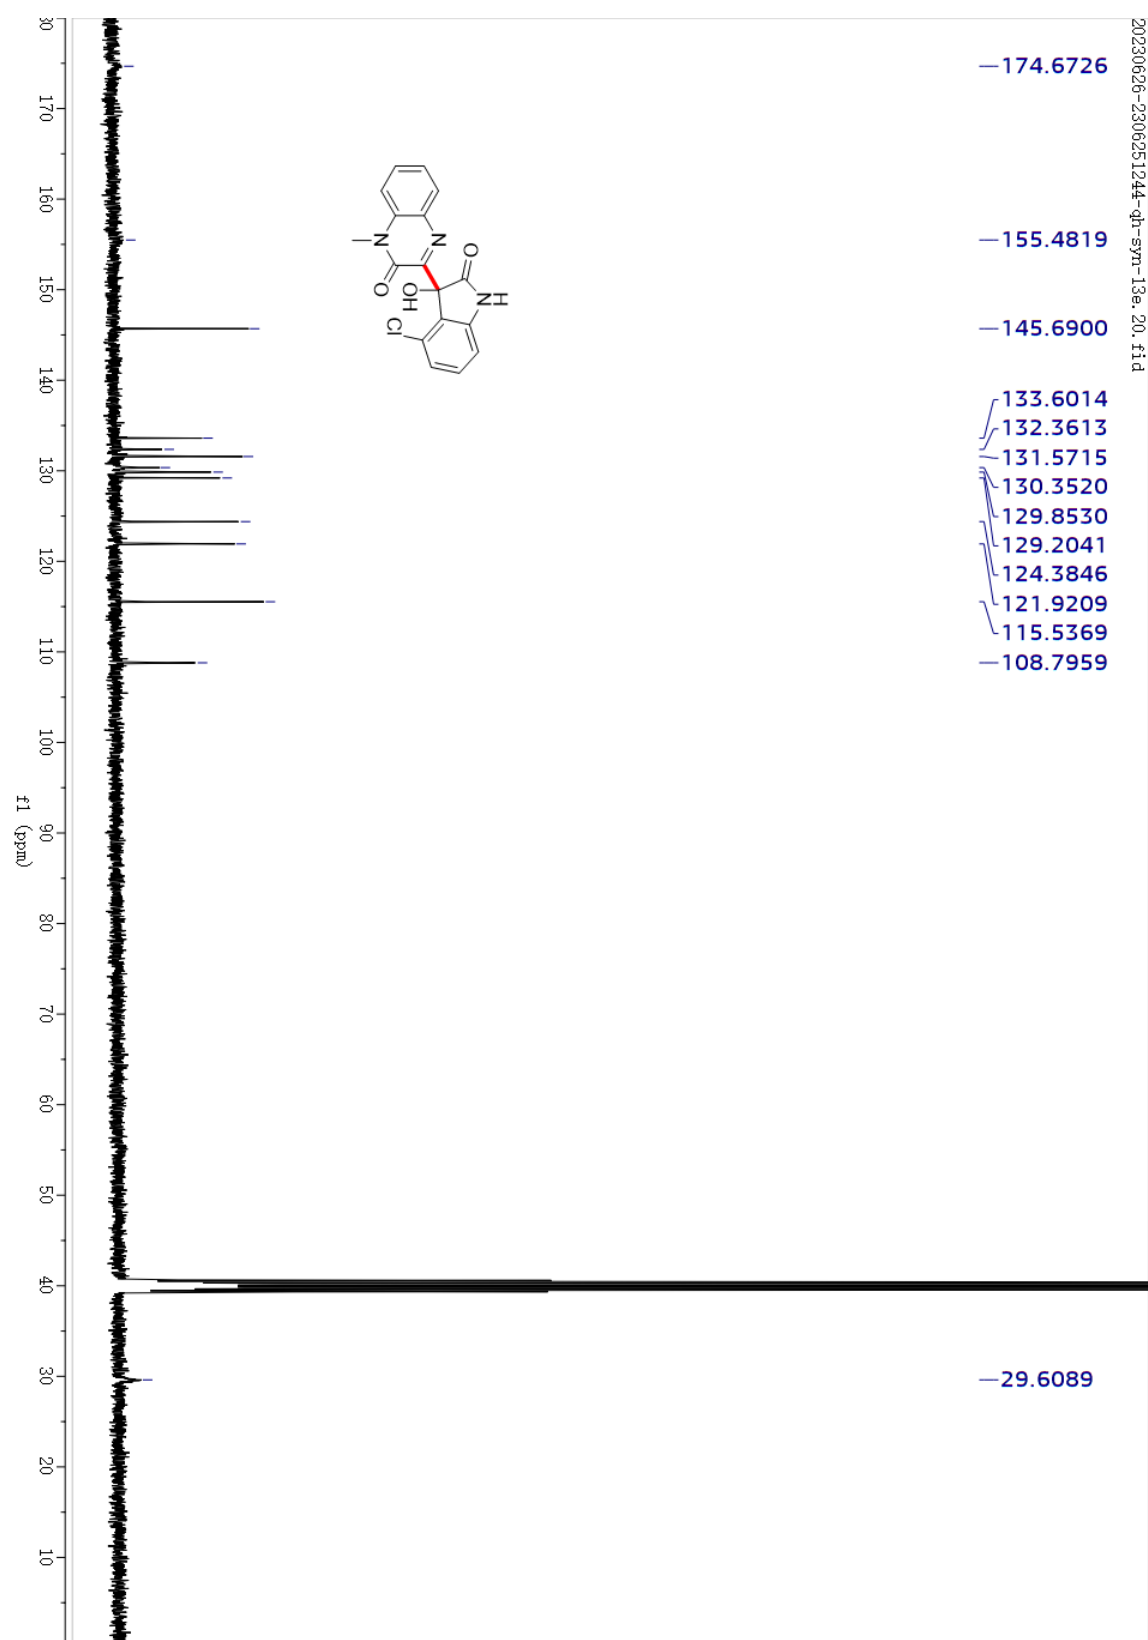

**Figure S8.** The  $^{13}\text{C}$  NMR Spectrum of Compound **3d** in  $\text{DMSO-}d_6$

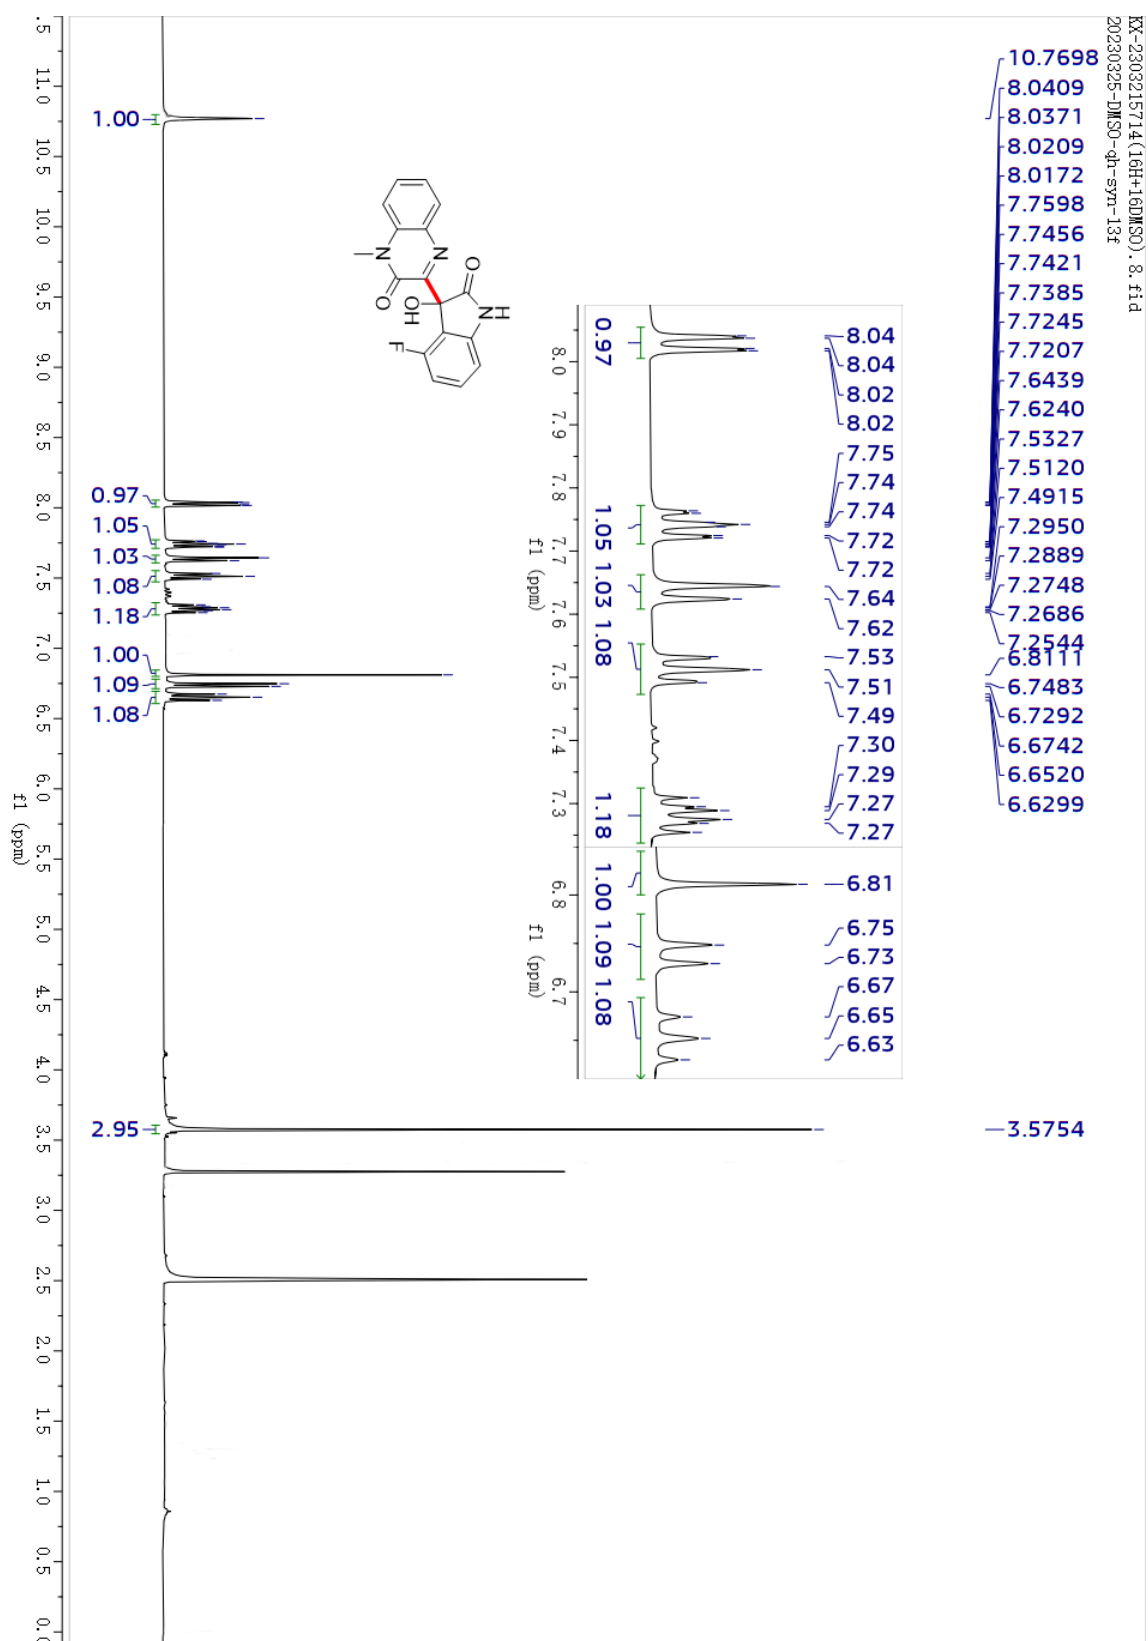

Figure S9. The  $^1\text{H}$  NMR Spectrum of Compound 3e in  $\text{DMSO-}d_6$

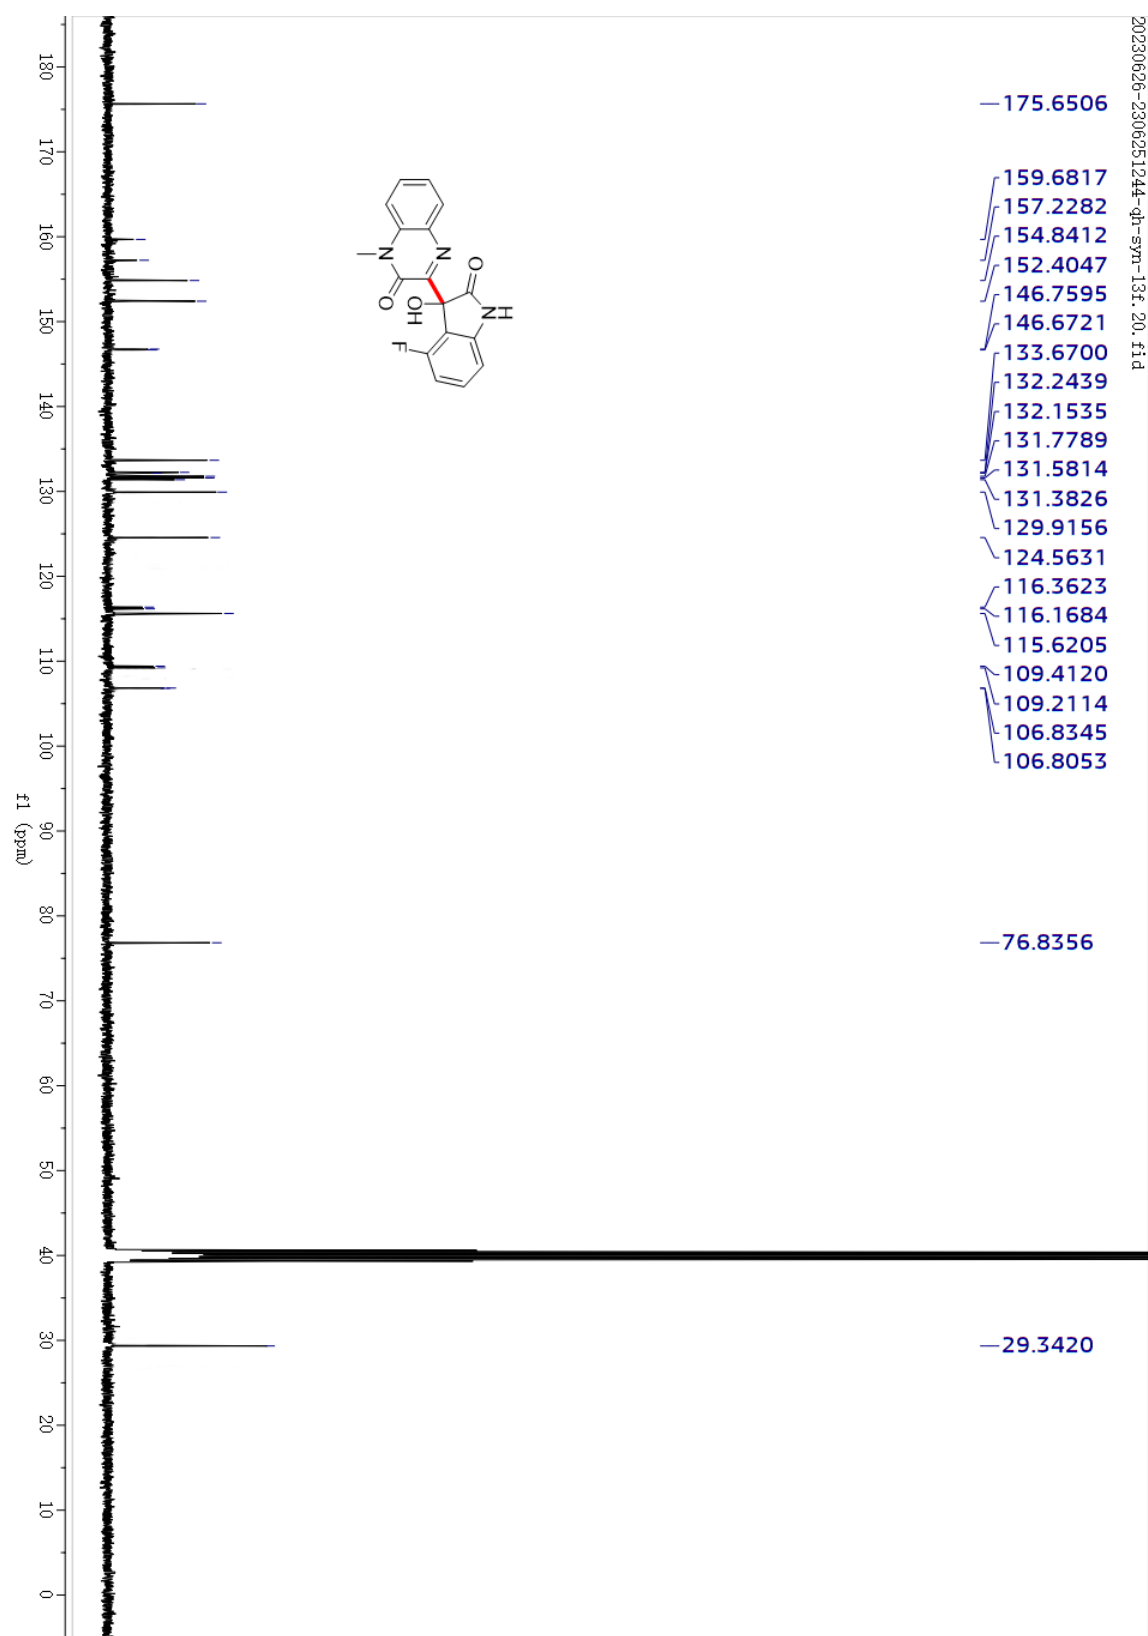

**Figure S10.** The  $^{13}\text{C}$  NMR Spectrum of Compound **3e** in  $\text{DMSO-}d_6$

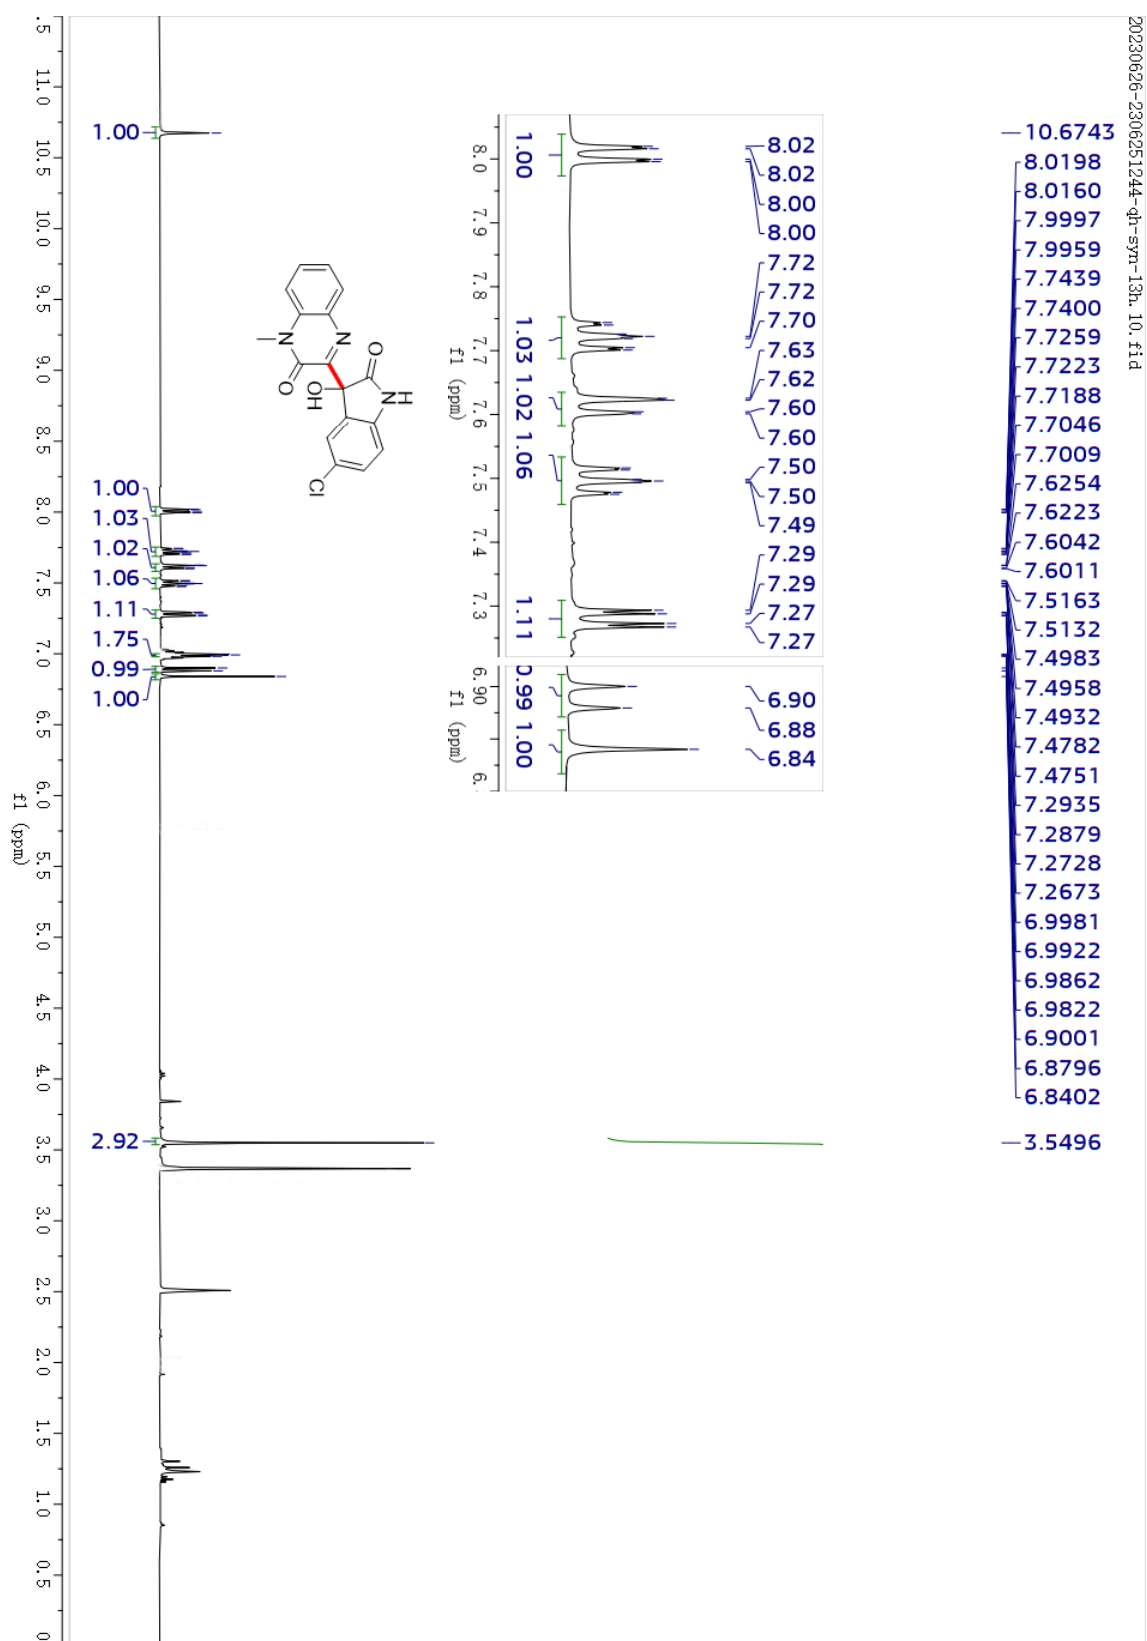

**Figure S11.** The <sup>1</sup>H NMR Spectrum of Compound **3f** in DMSO-*d*<sub>6</sub>

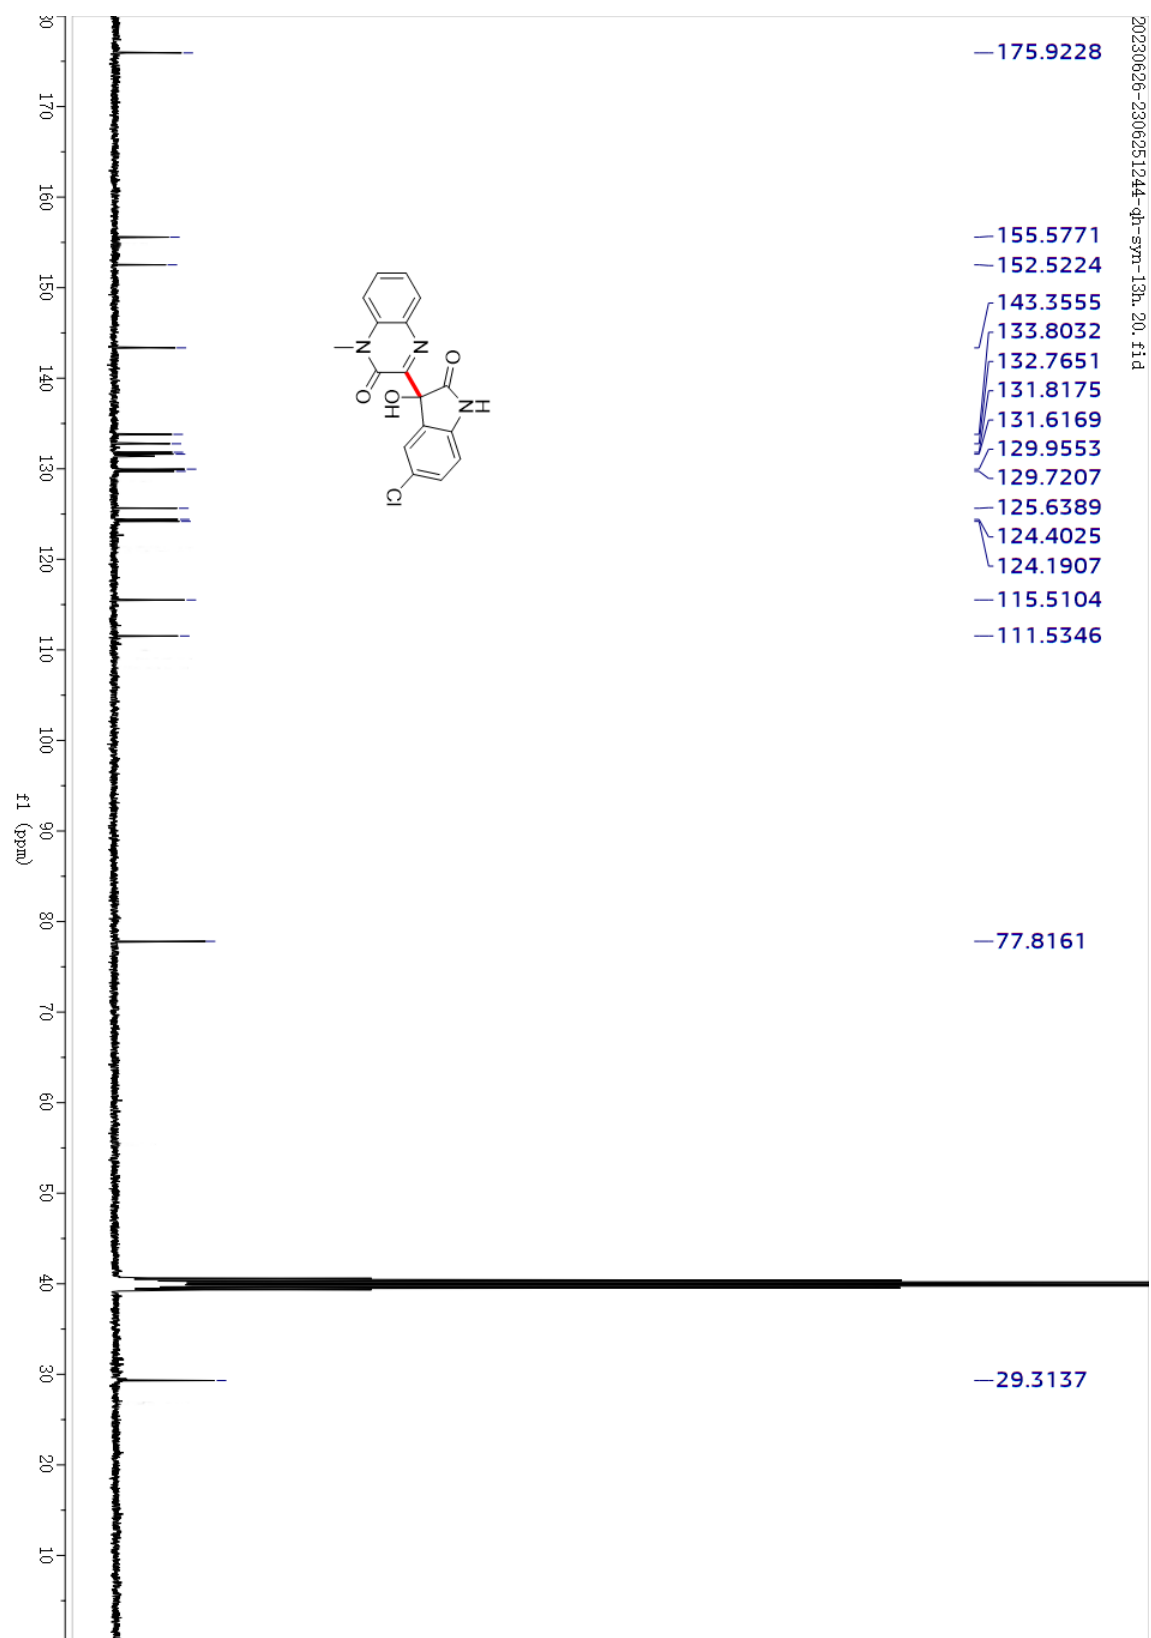

**Figure S12.** The  $^{13}\text{C}$  NMR Spectrum of Compound **3f** in  $\text{DMSO}-d_6$

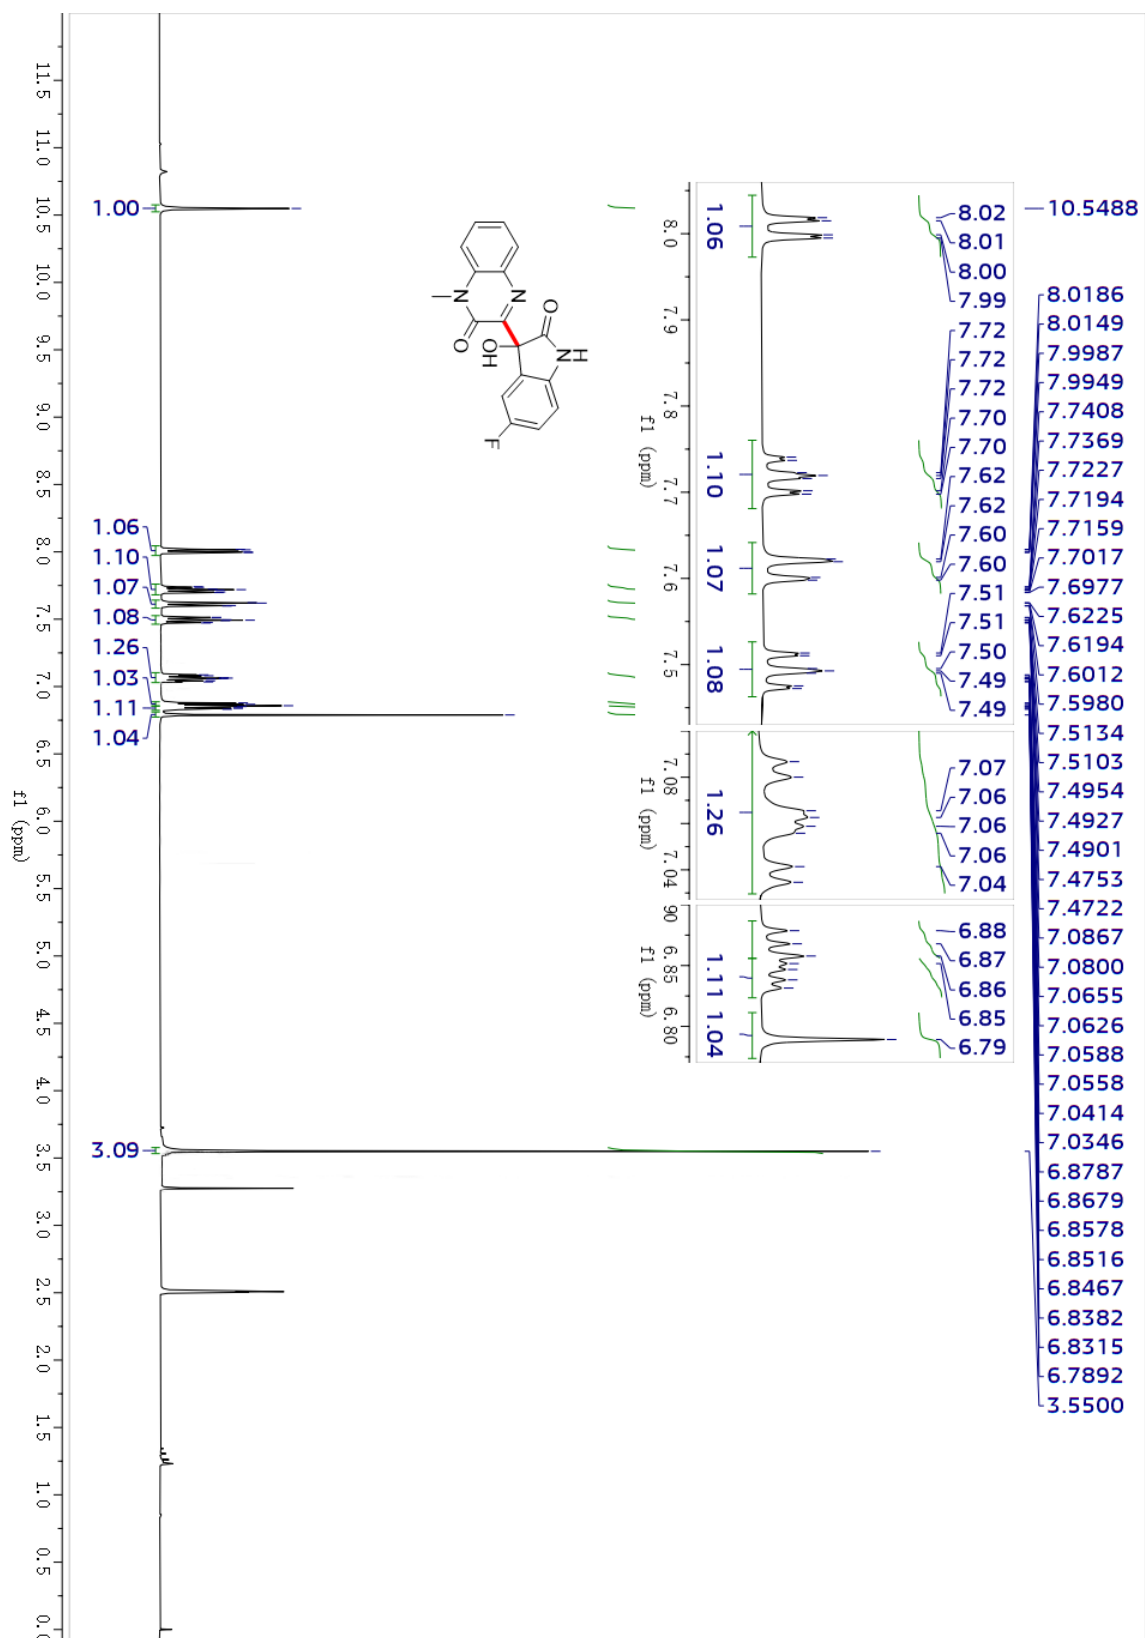

**Figure S13.** The <sup>1</sup>H NMR Spectrum of Compound **3g** in DMSO-*d*<sub>6</sub>

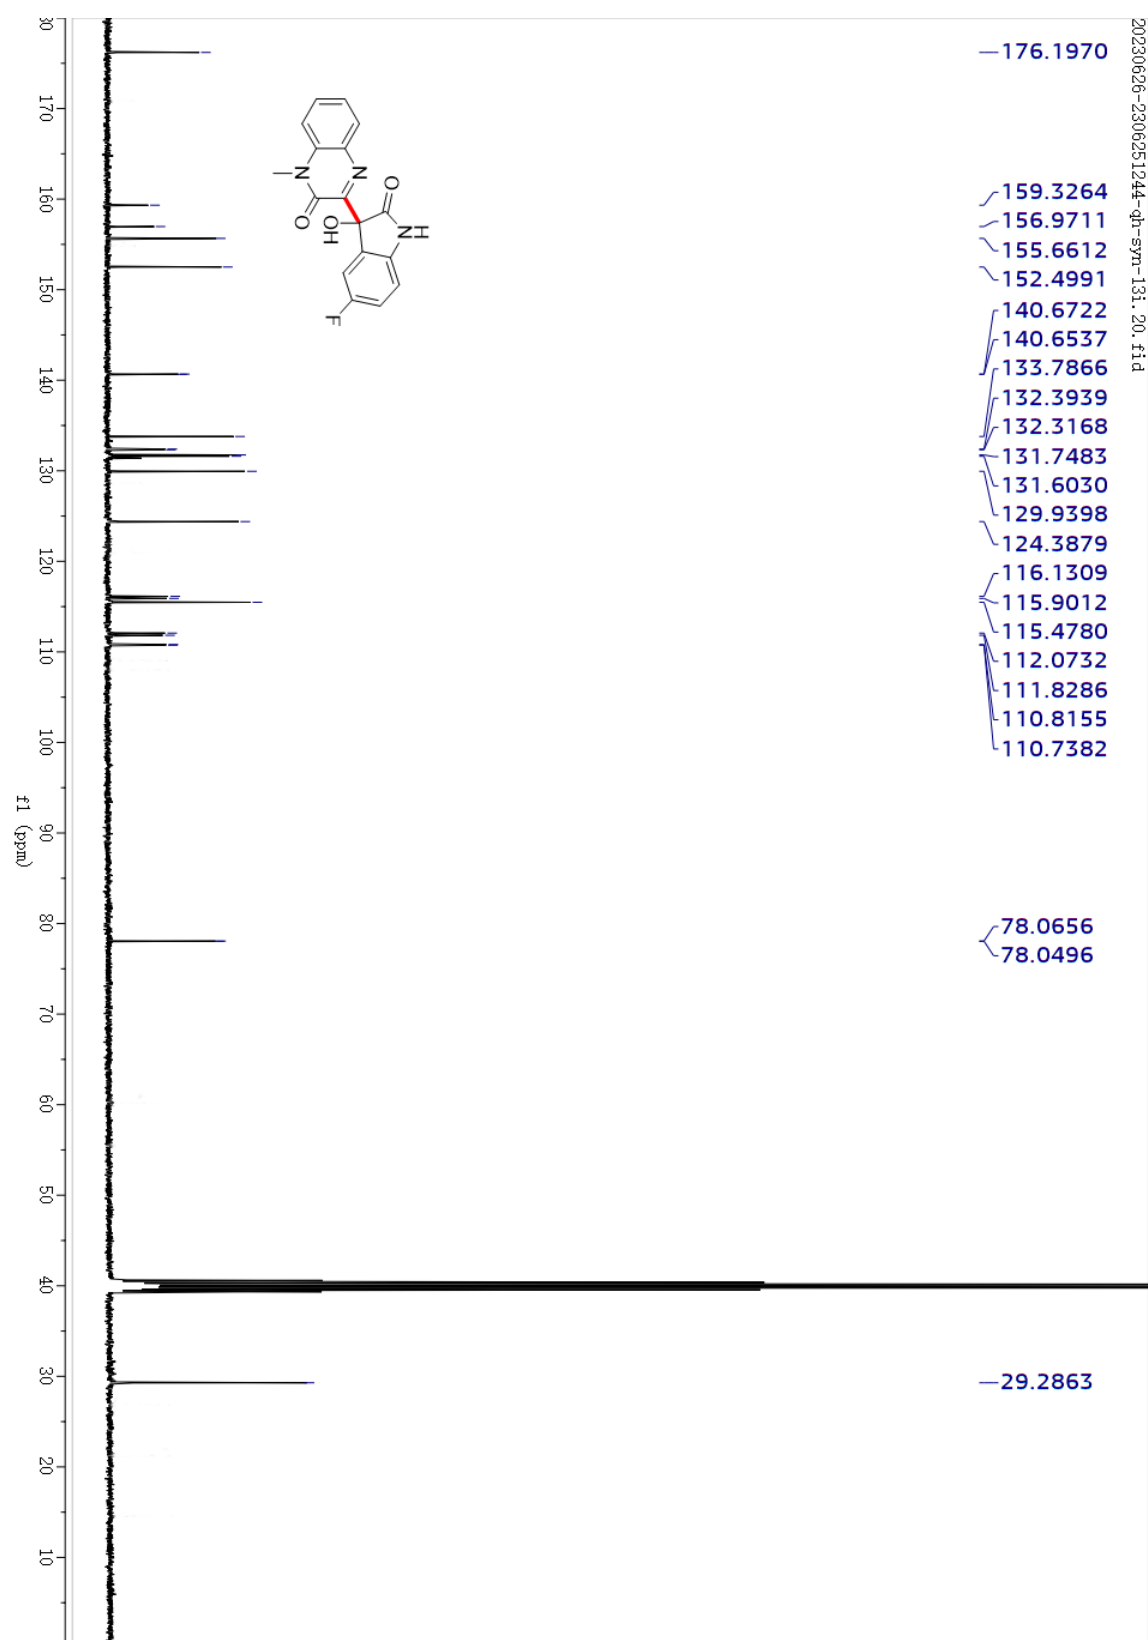

Figure S14. The <sup>13</sup>C NMR Spectrum of Compound **3g** in DMSO-*d*<sub>6</sub>

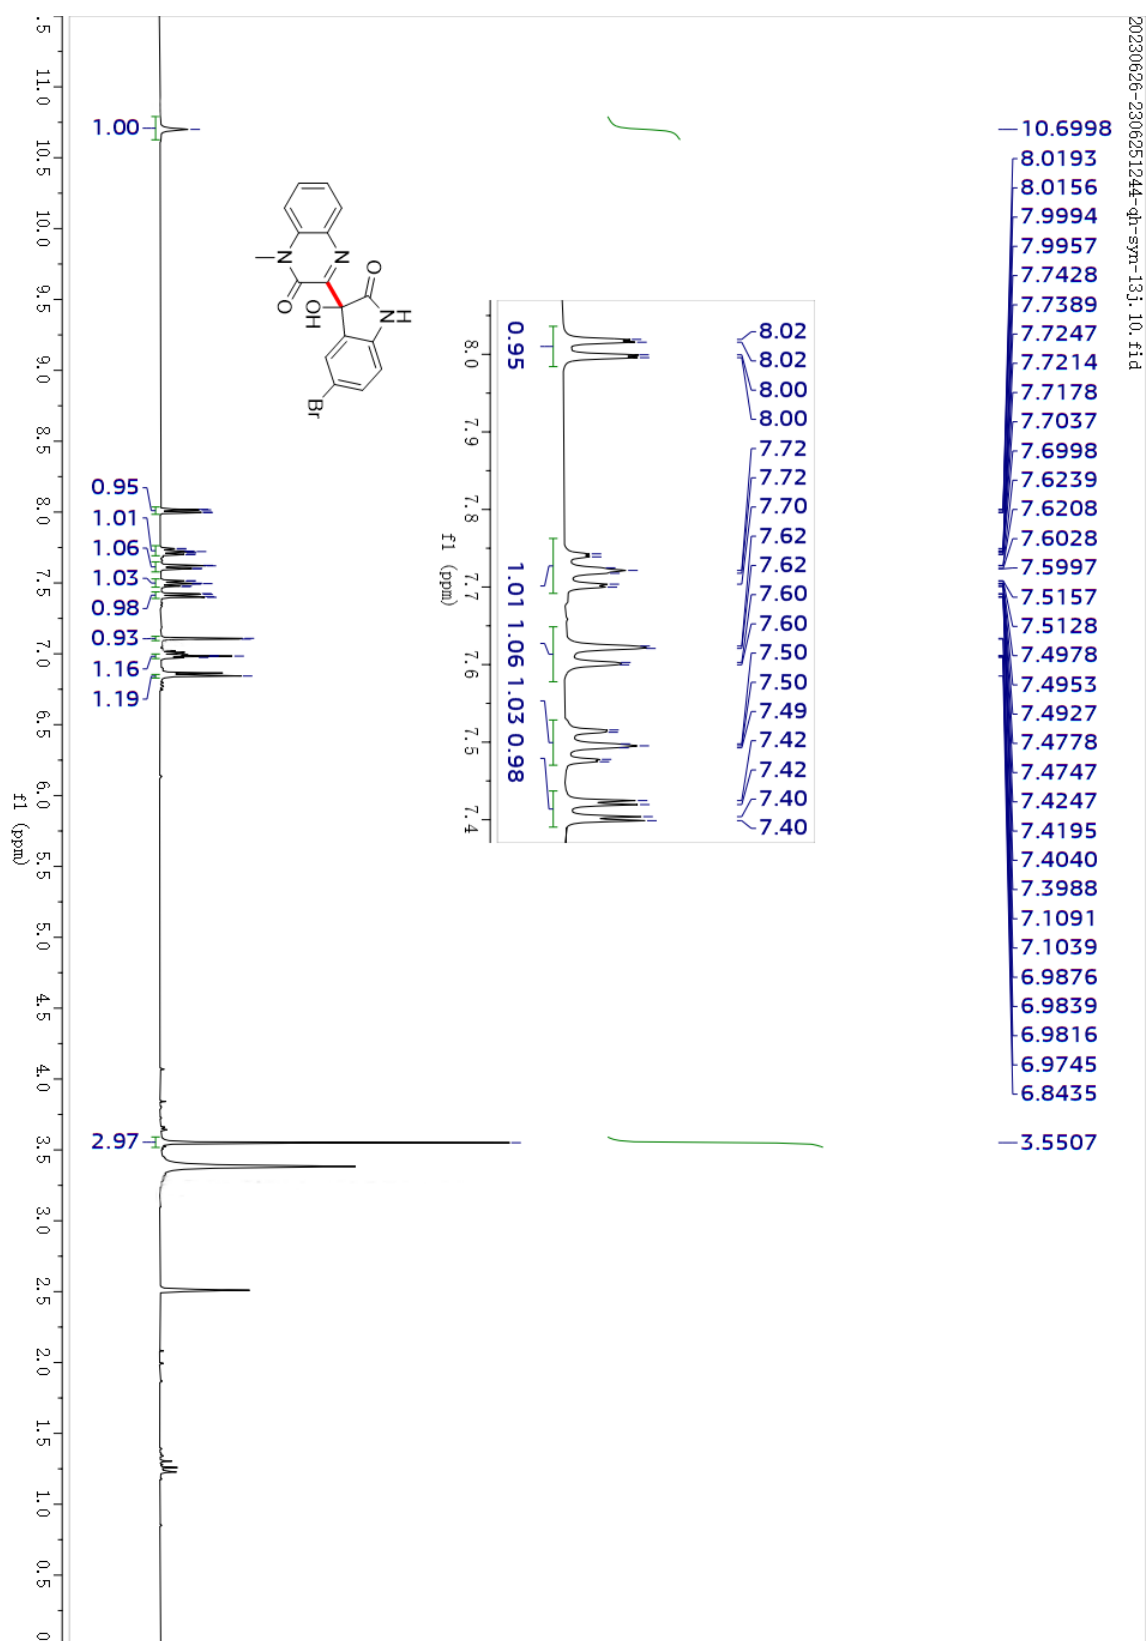

**Figure S15.** The <sup>1</sup>H NMR Spectrum of Compound **3h** in DMSO-*d*<sub>6</sub>

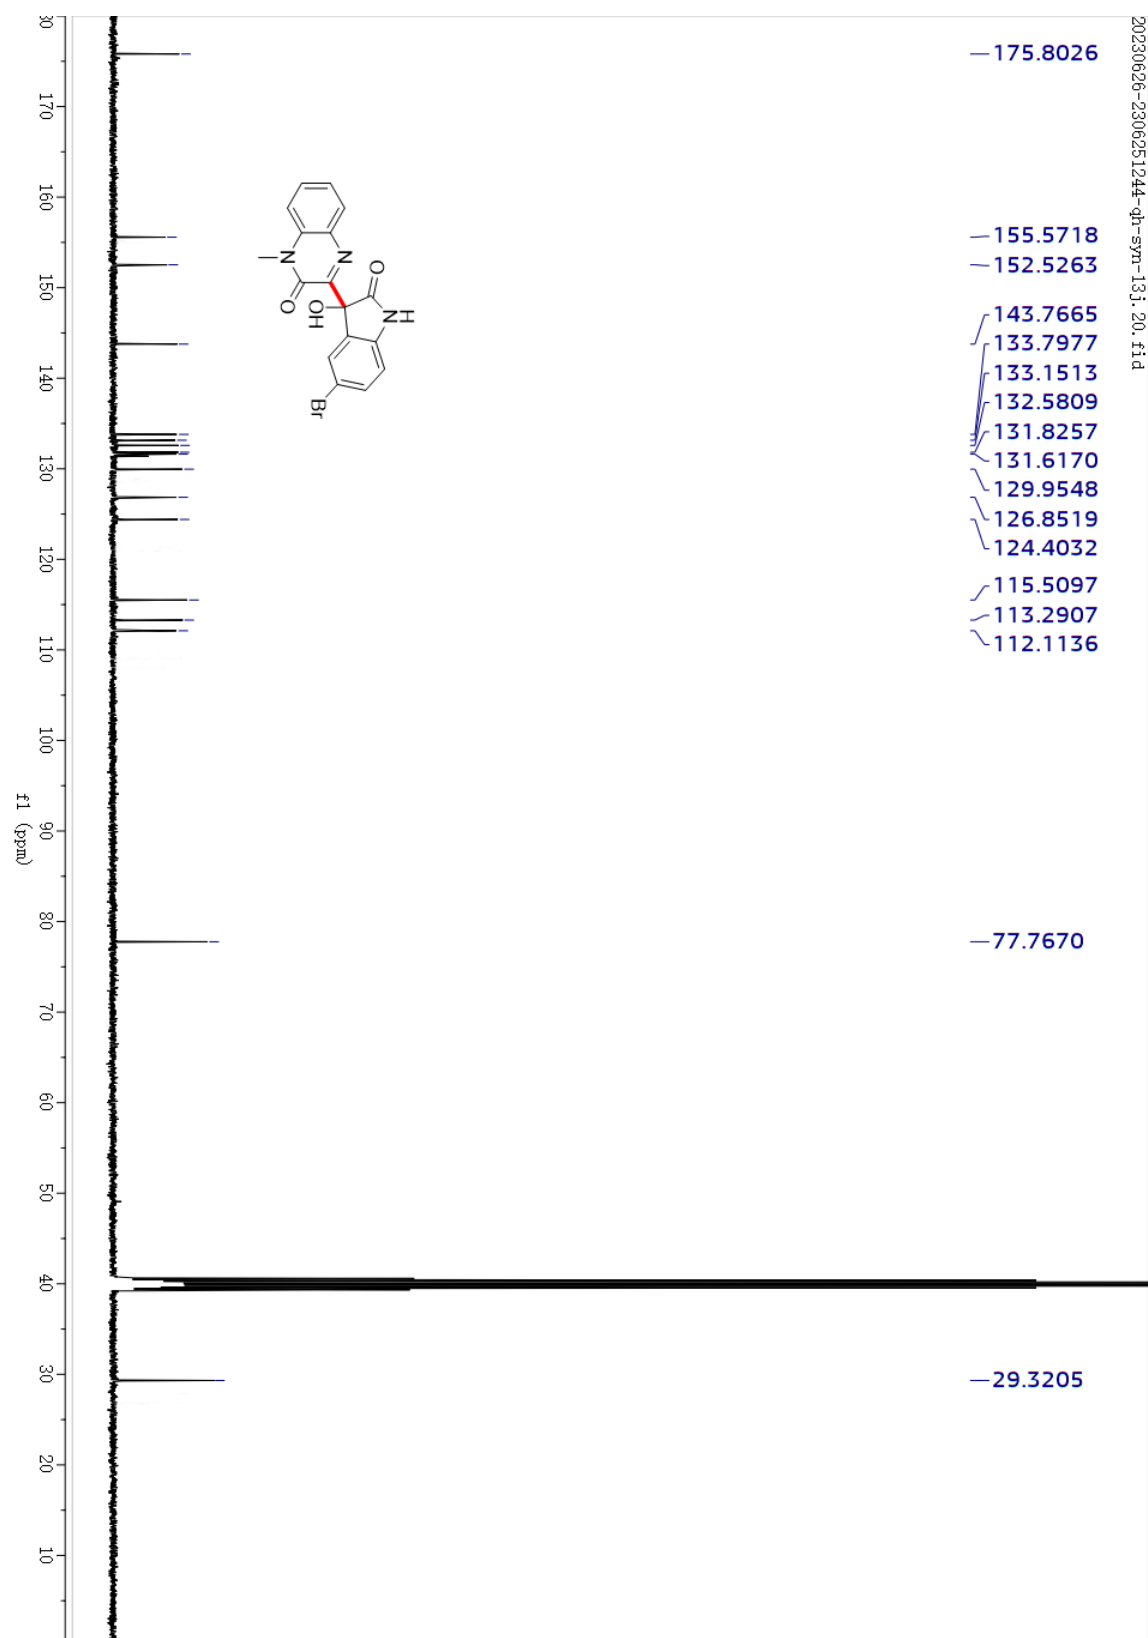

**Figure S16.** The  $^{13}\text{C}$  NMR Spectrum of Compound **3h** in  $\text{DMSO}-d_6$

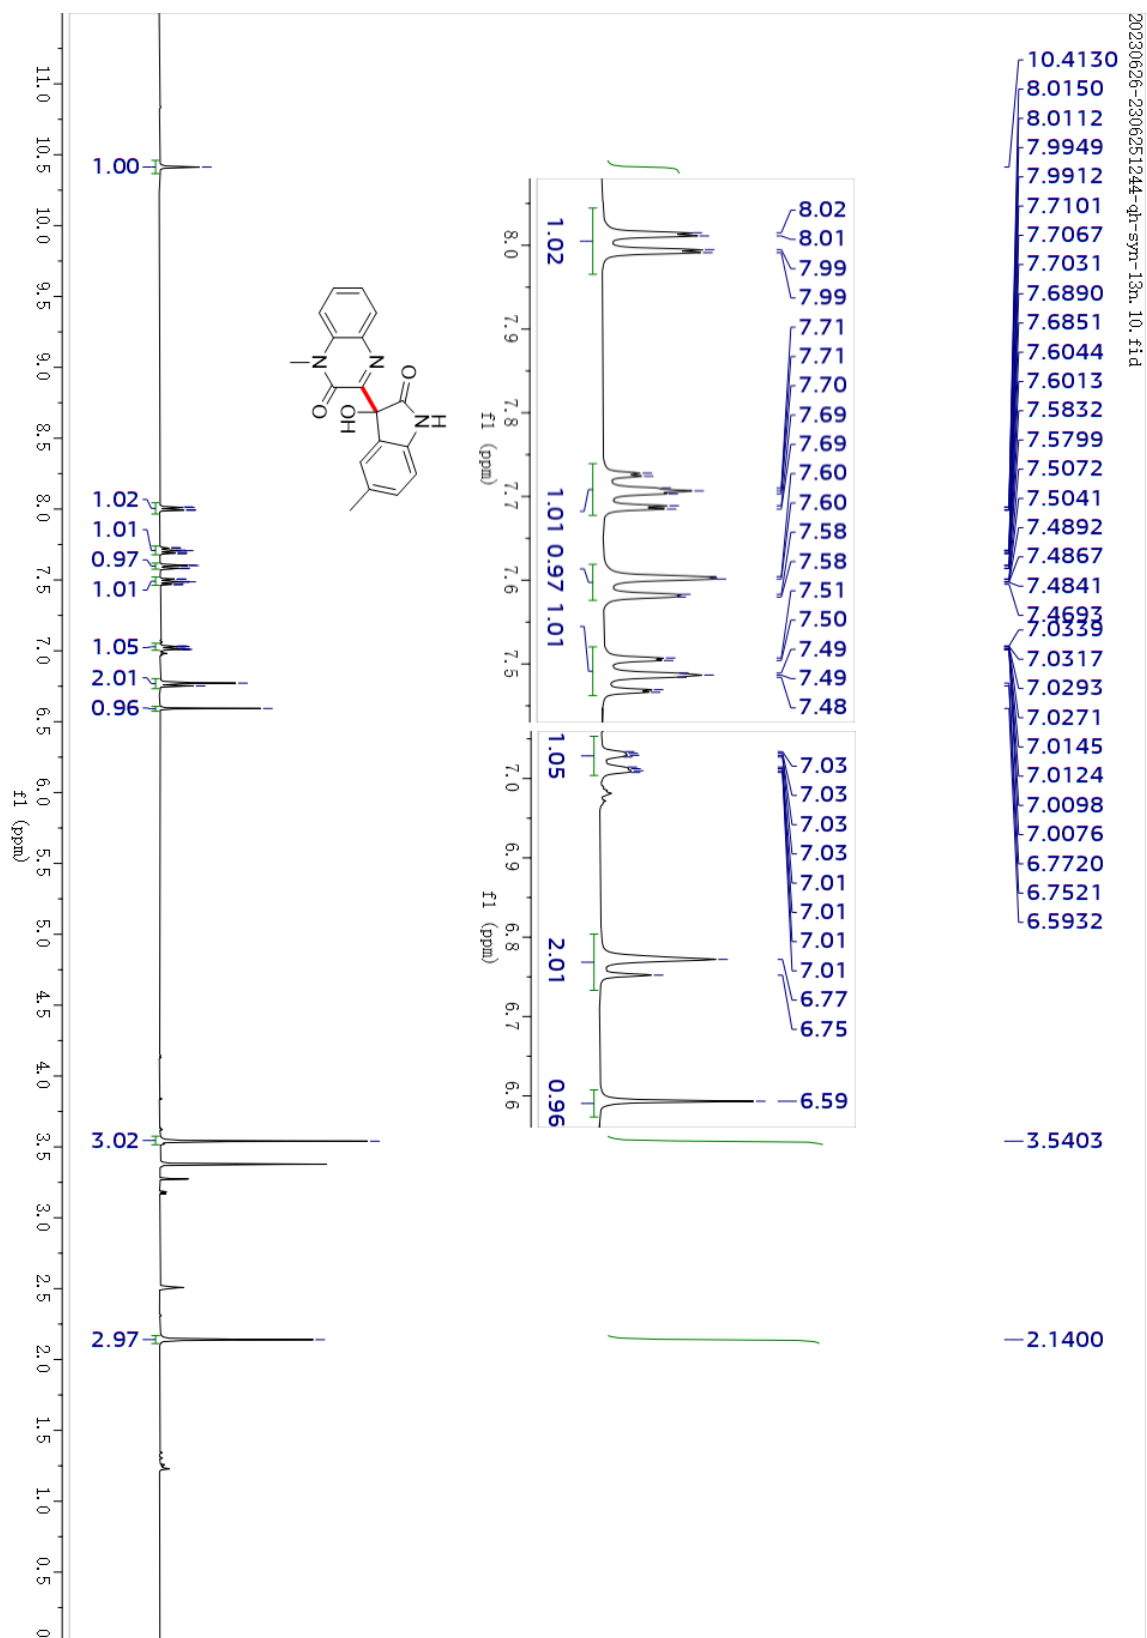

**Figure S17.** The  $^1\text{H}$  NMR Spectrum of Compound **3i** in  $\text{DMSO}-d_6$

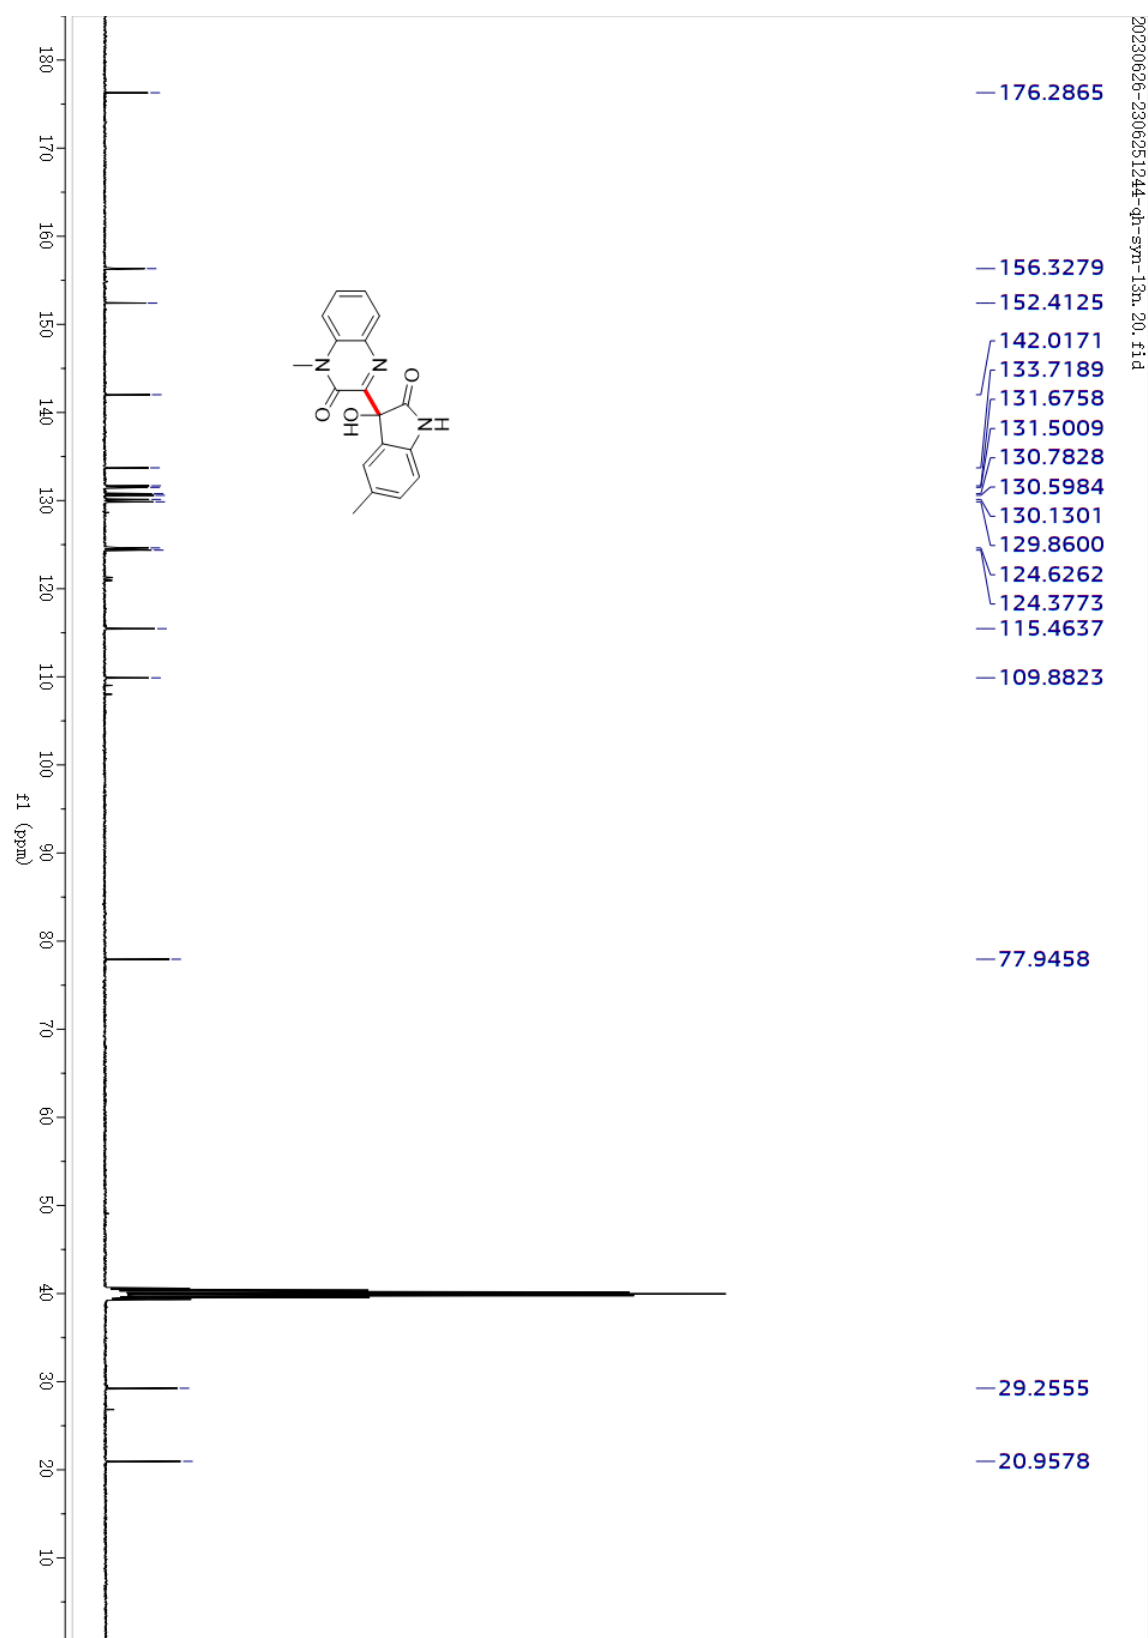

**Figure S18.** The  $^{13}\text{C}$  NMR Spectrum of Compound **3i** in  $\text{DMSO-}d_6$

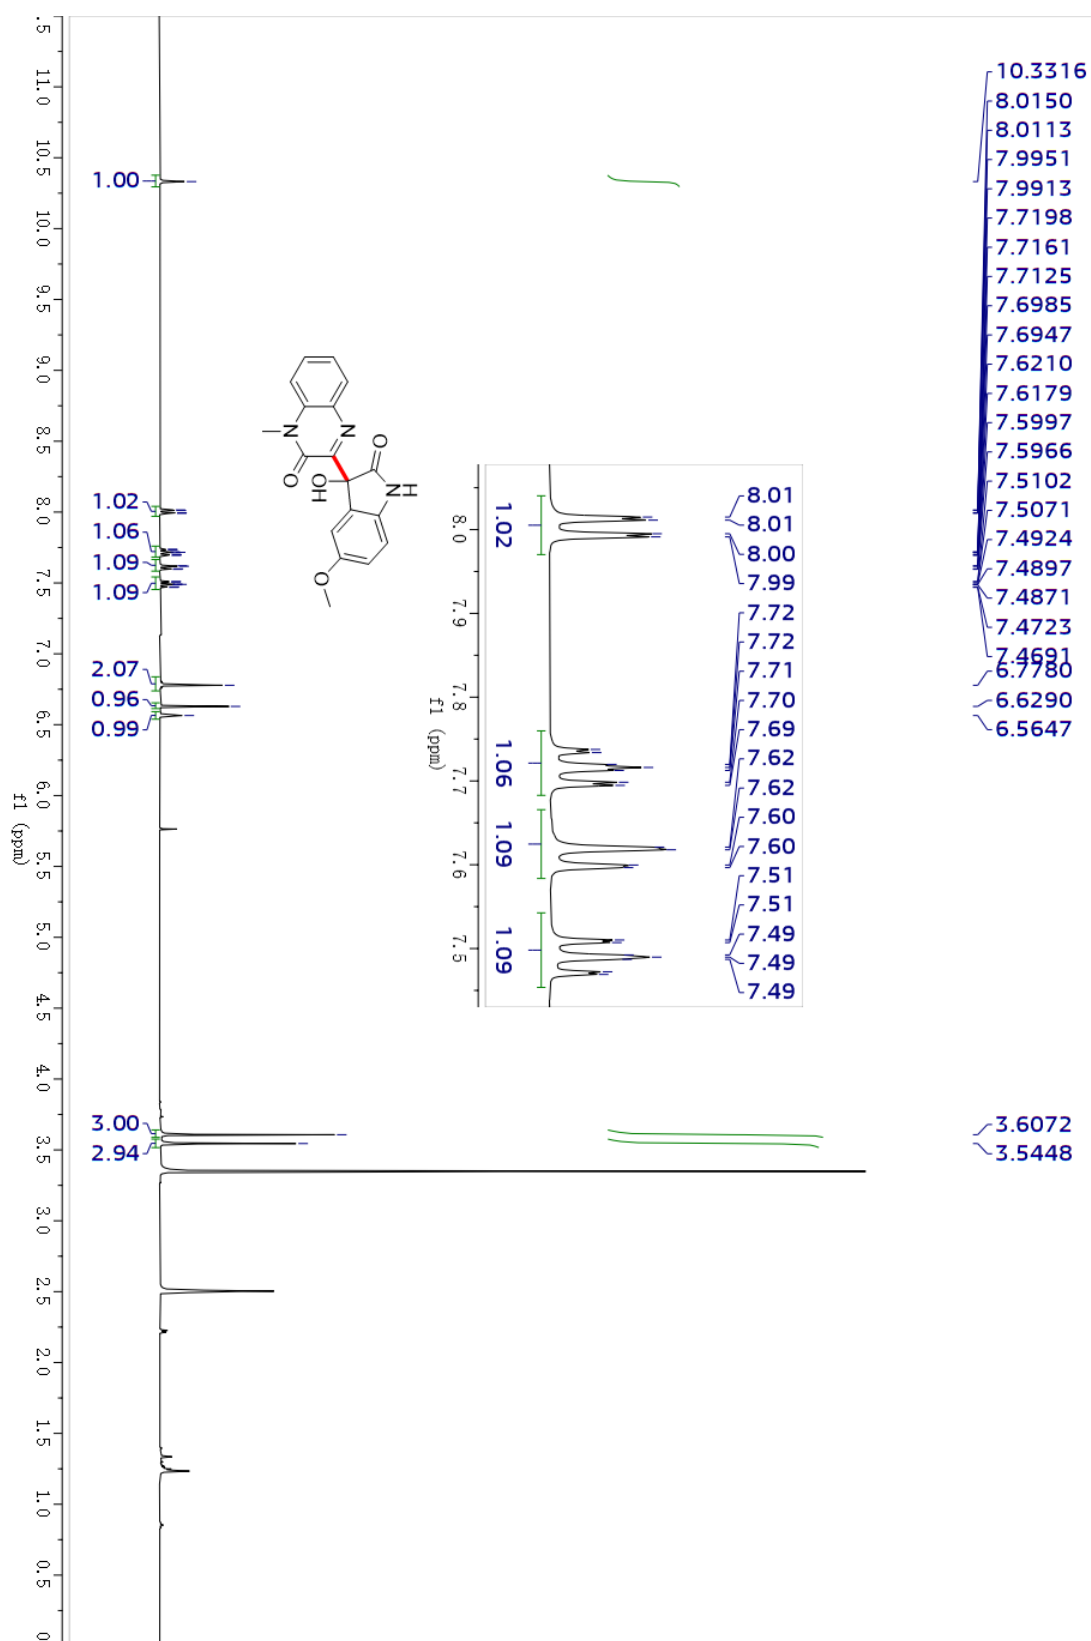

**Figure S19.** The  $^1\text{H}$  NMR Spectrum of Compound **3j** in  $\text{DMSO}-d_6$

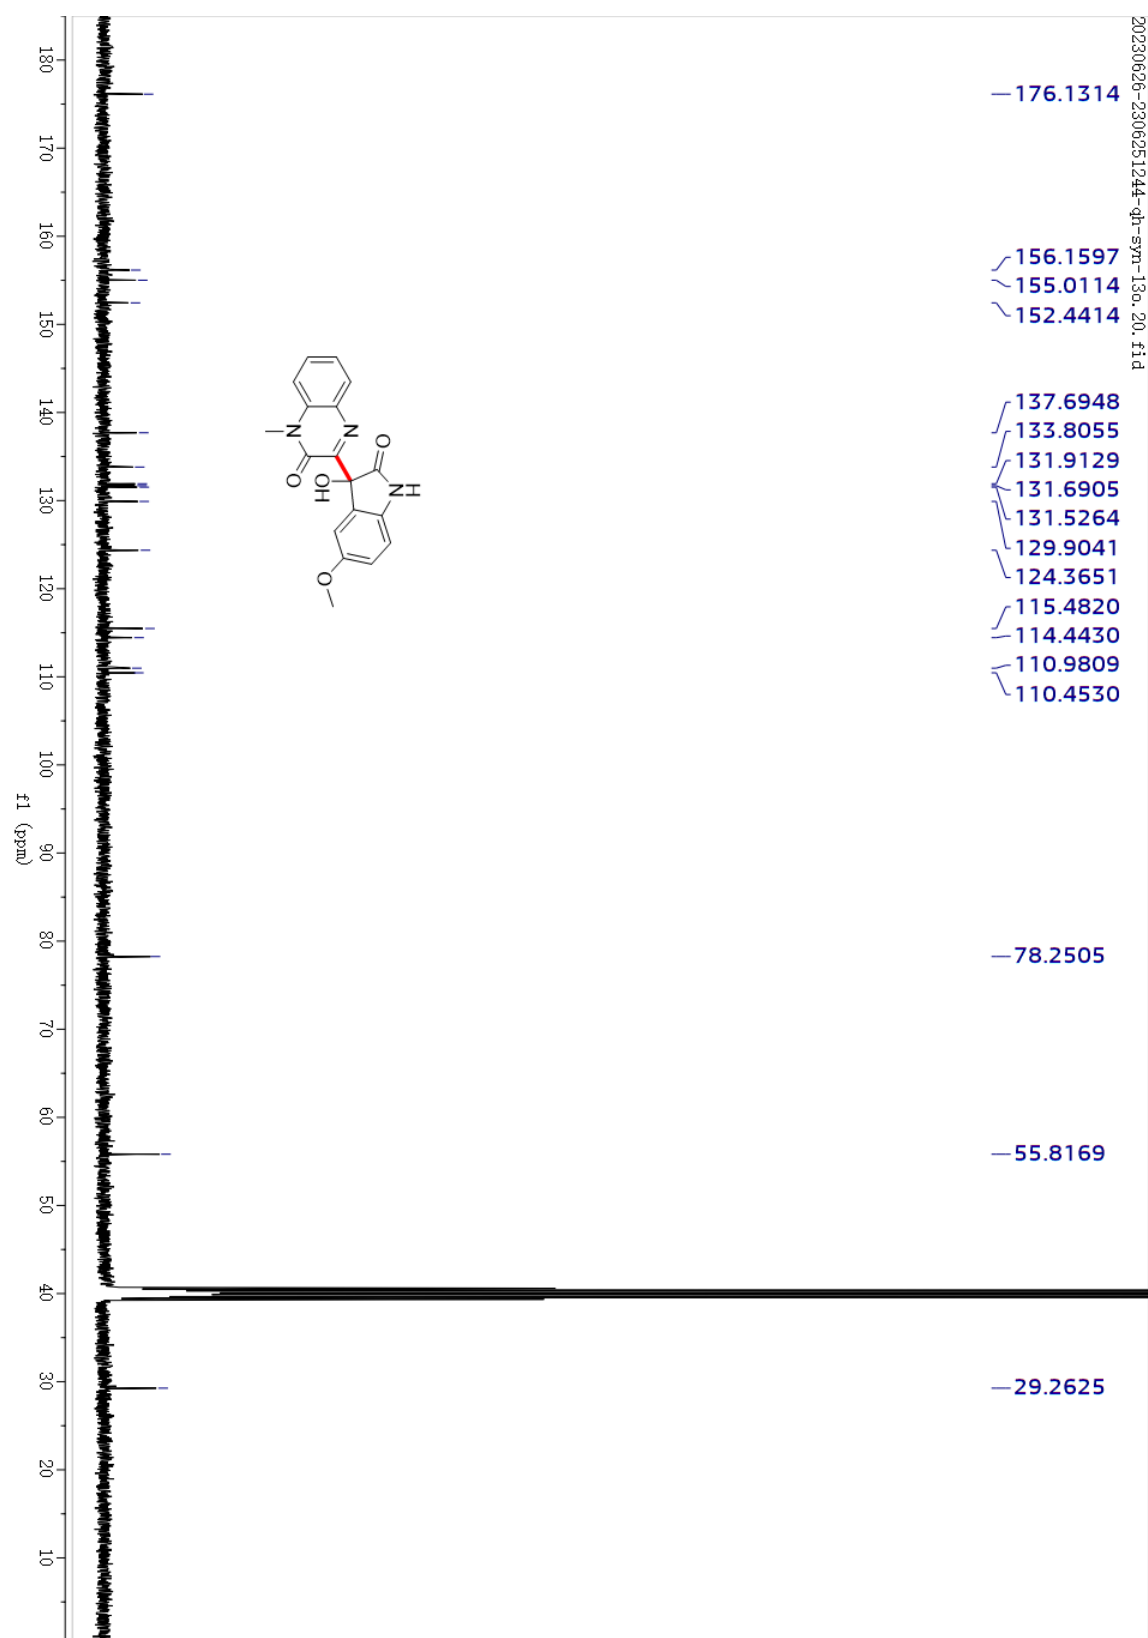

Figure S20. The  $^{13}\text{C}$  NMR Spectrum of Compound **3j** in  $\text{DMSO}-d_6$

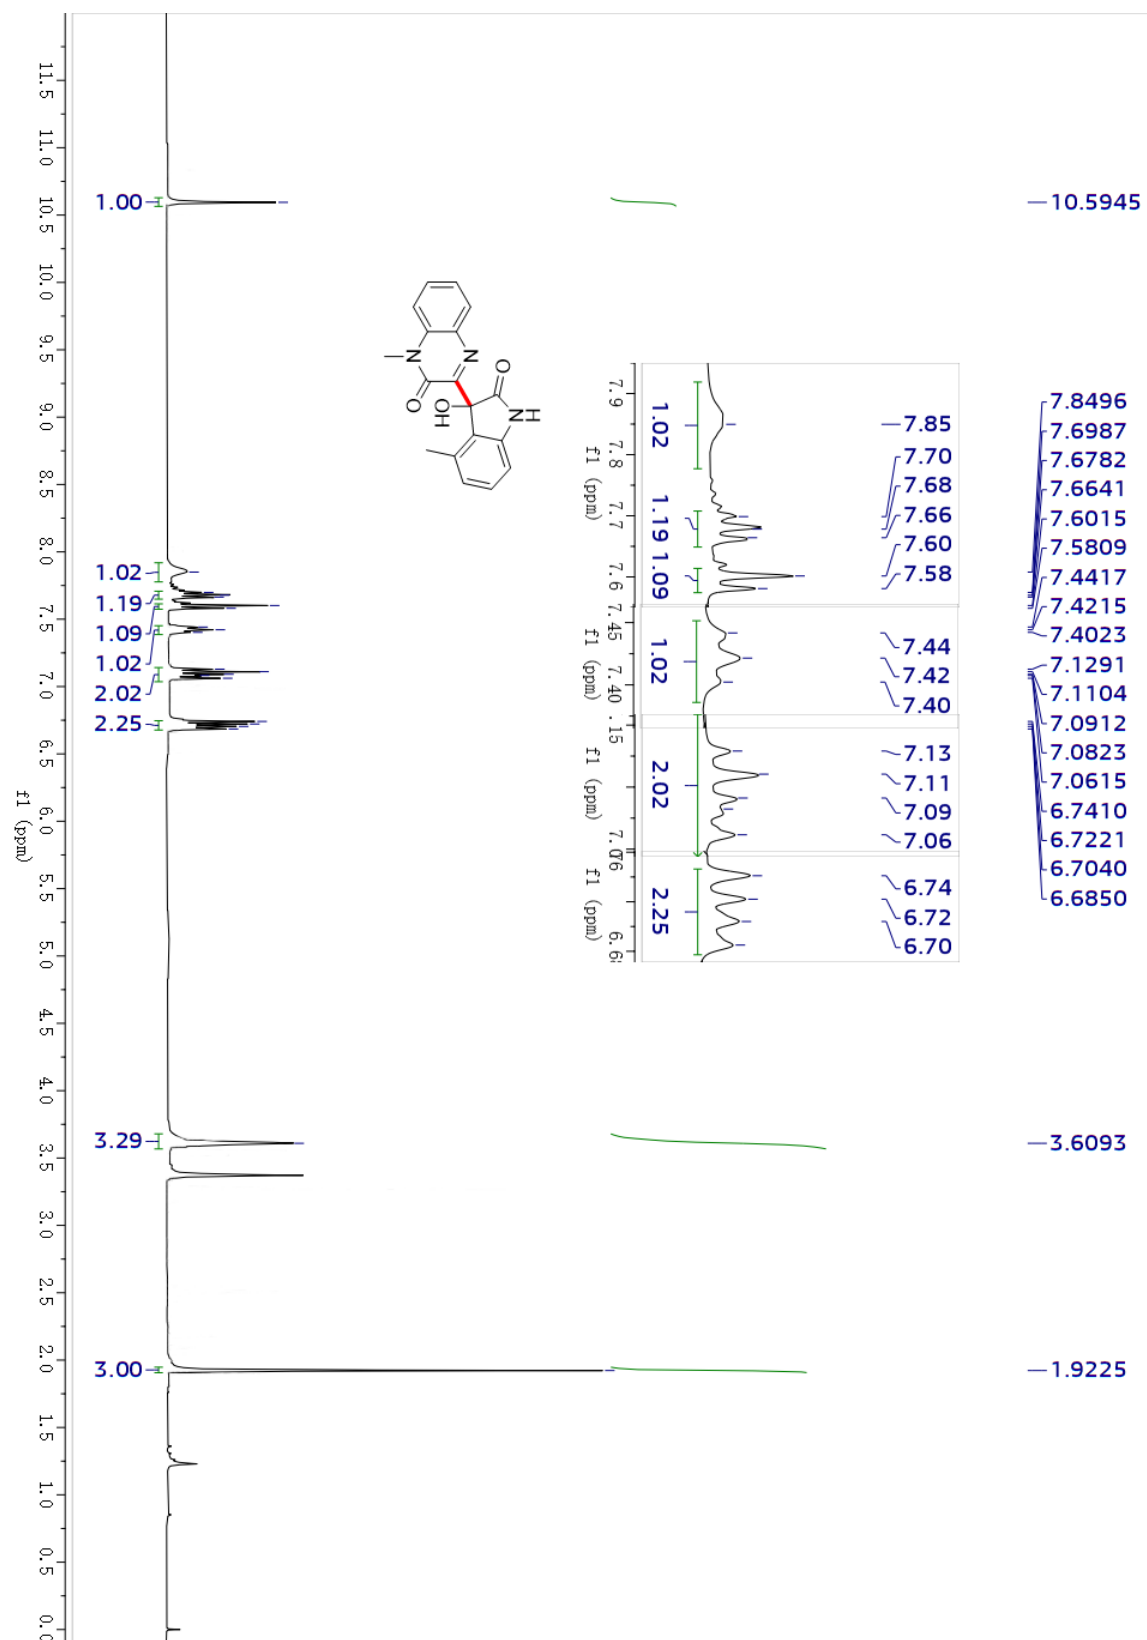

**Figure S21.** The  $^1\text{H}$  NMR Spectrum of Compound **3k** in  $\text{DMSO}-d_6$

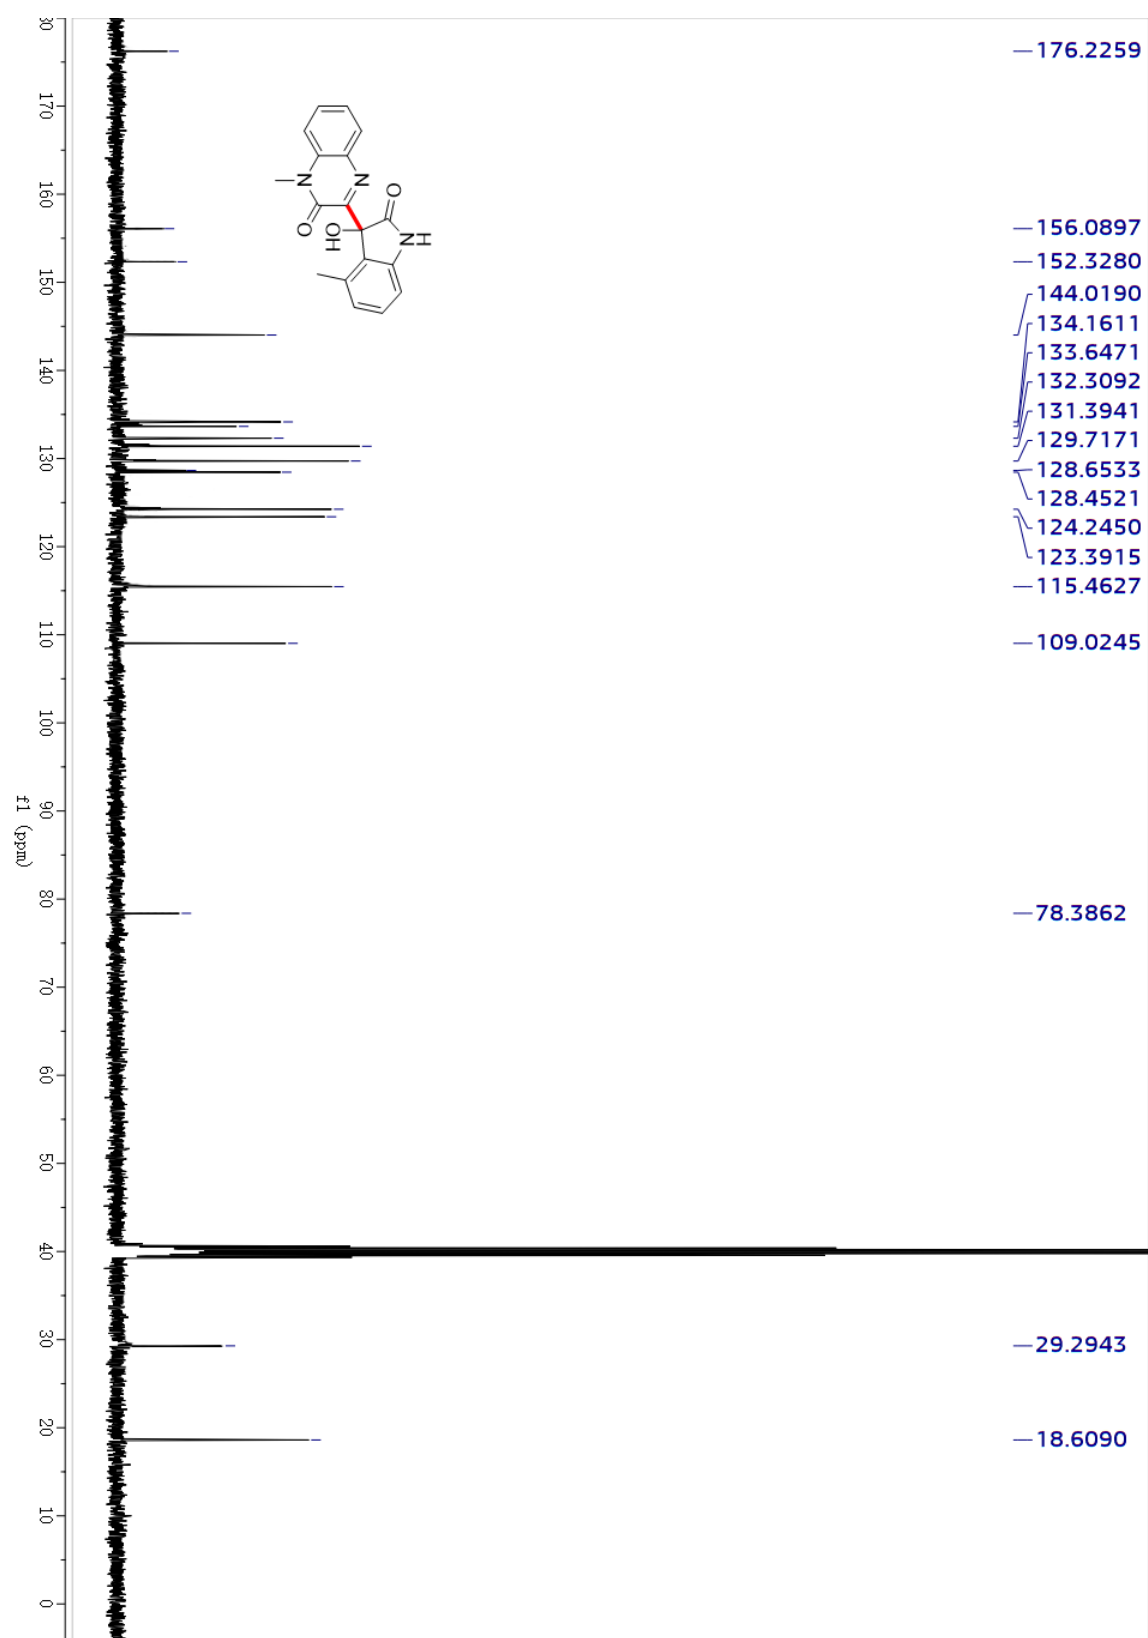

Figure S22. The  $^{13}\text{C}$  NMR Spectrum of Compound **3k** in  $\text{DMSO-}d_6$

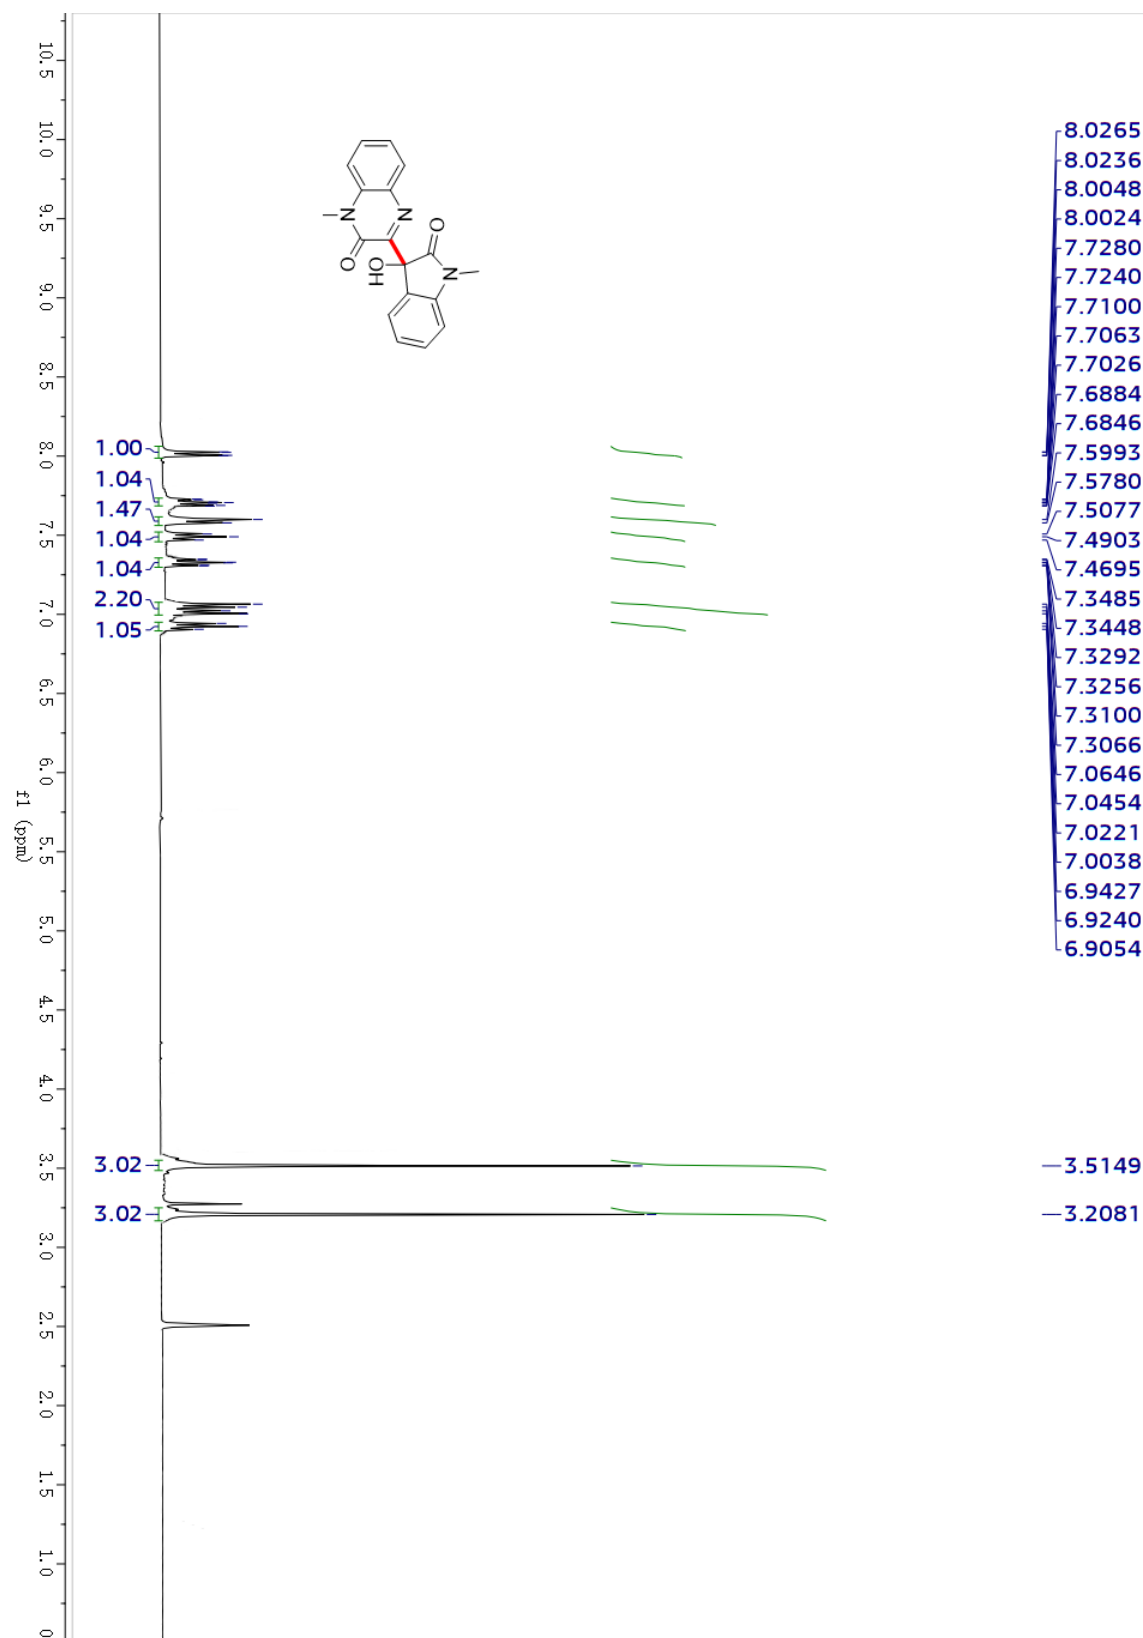

**Figure S23.** The <sup>1</sup>H NMR Spectrum of Compound **3I** in DMSO-*d*<sub>6</sub>

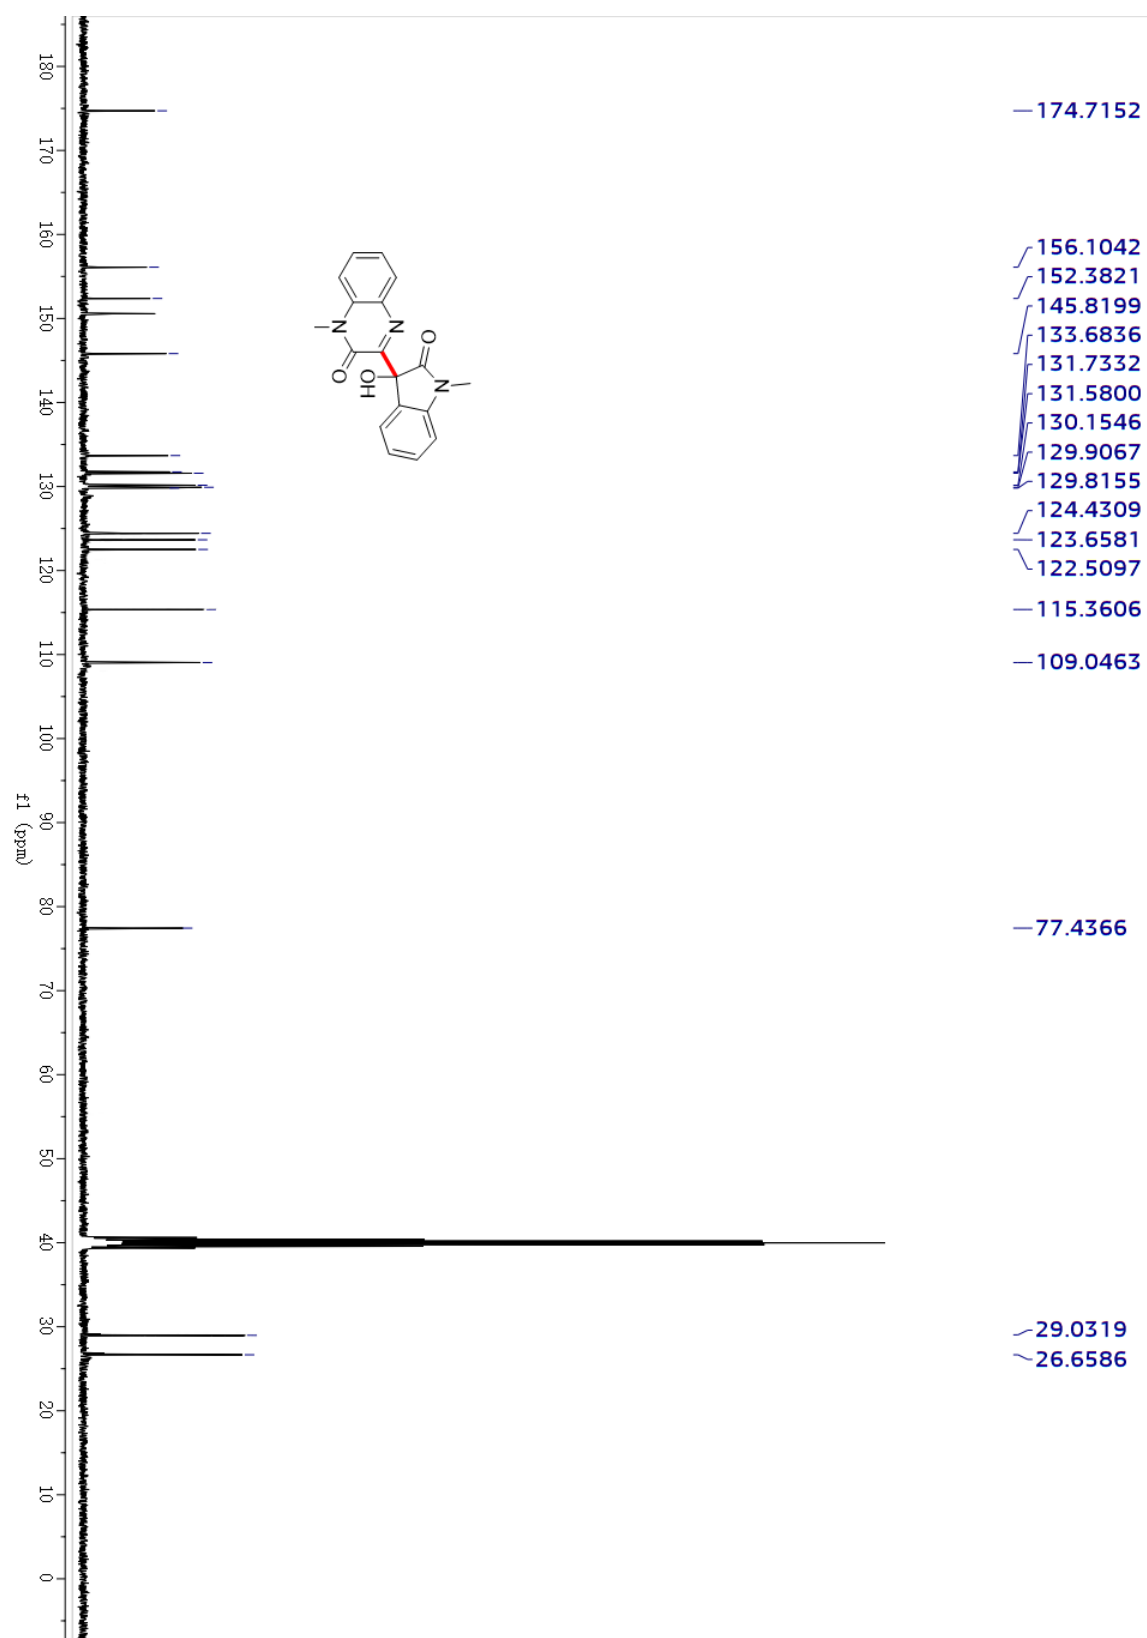

**Figure S24.** The  $^{13}\text{C}$  NMR Spectrum of Compound **3I** in  $\text{DMSO-}d_6$

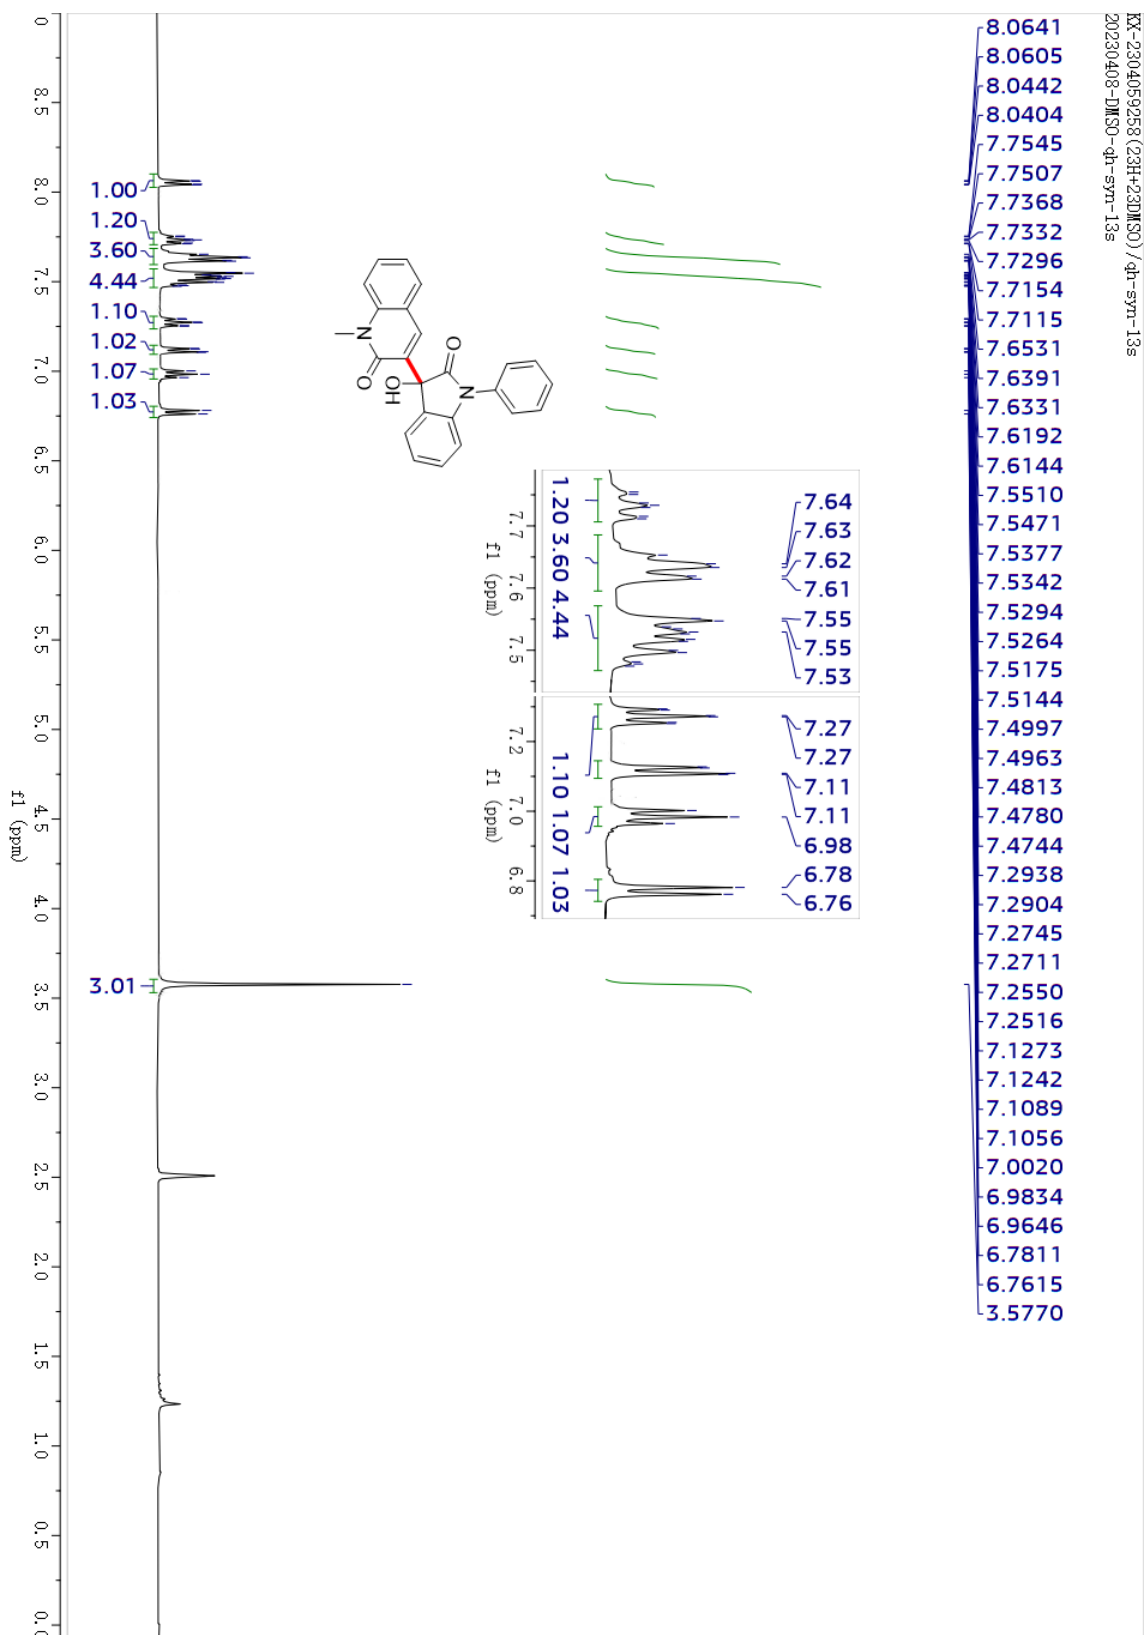

**Figure S25.** The  $^1\text{H}$  NMR Spectrum of Compound **3m** in  $\text{DMSO-}d_6$

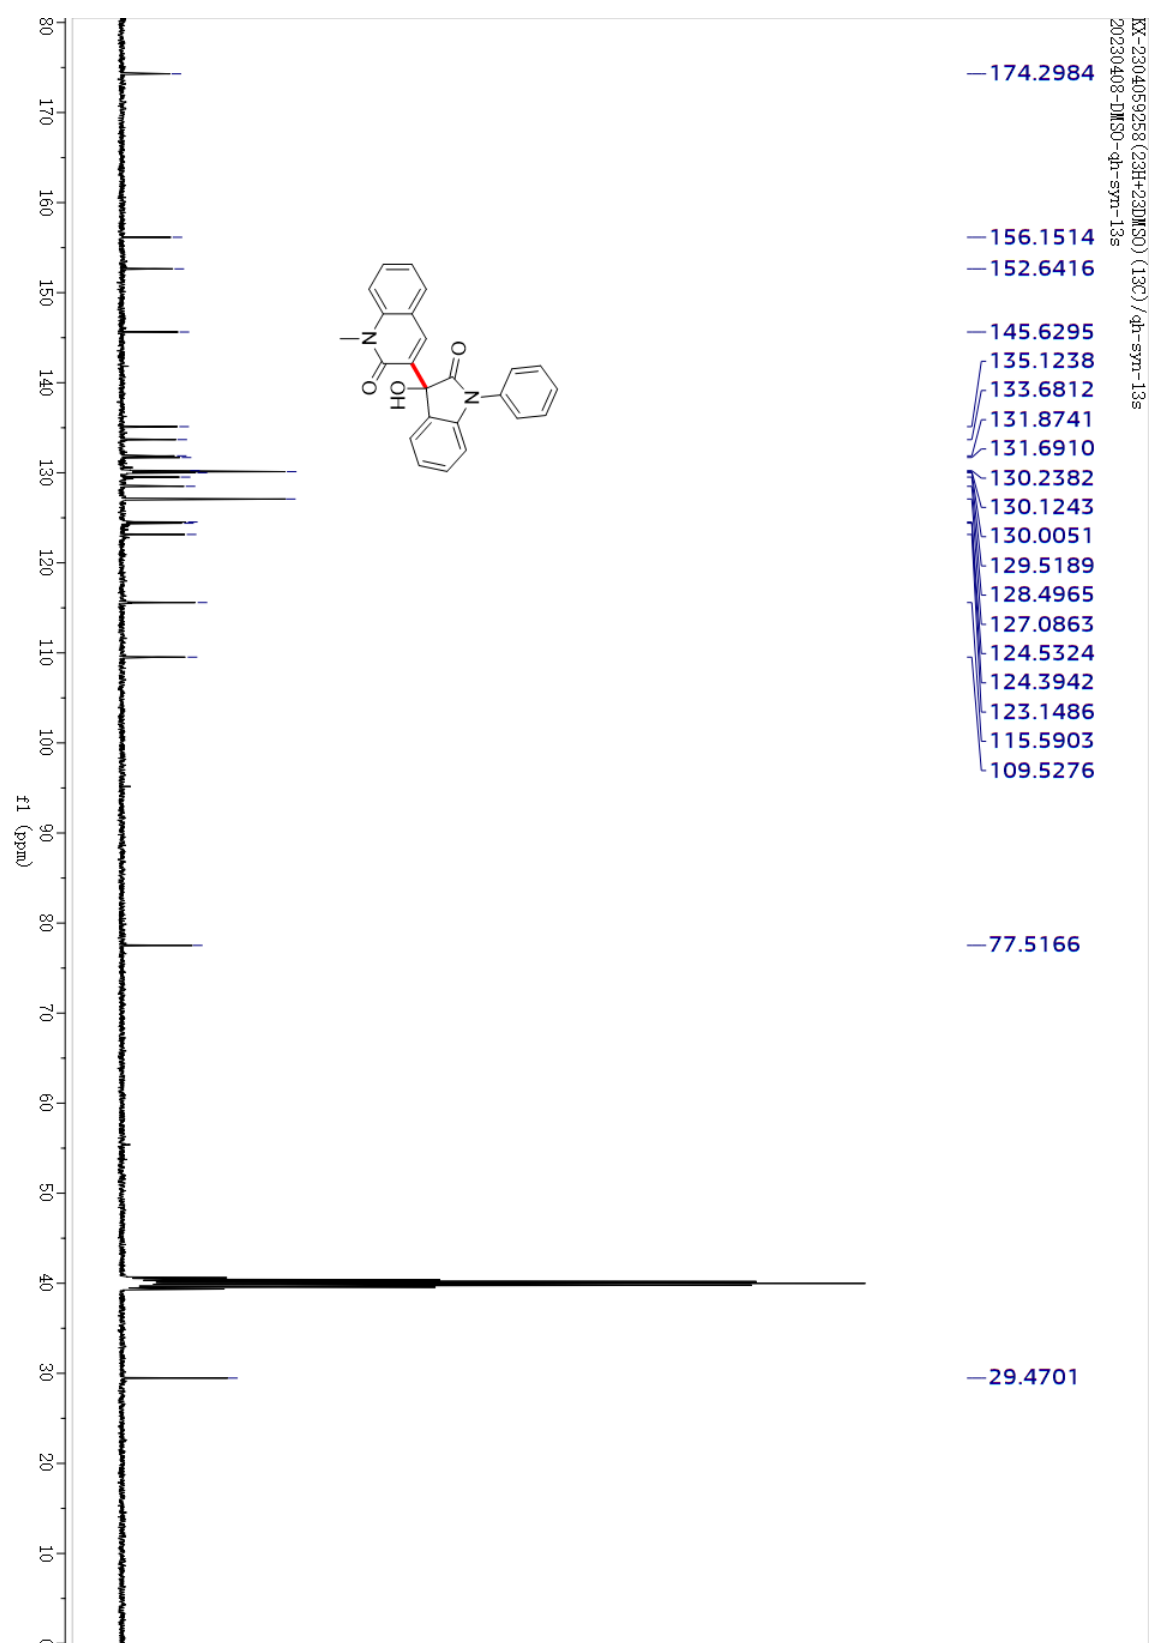

**Figure S26.** The  $^{13}\text{C}$  NMR Spectrum of Compound **3m** in  $\text{DMSO-}d_6$

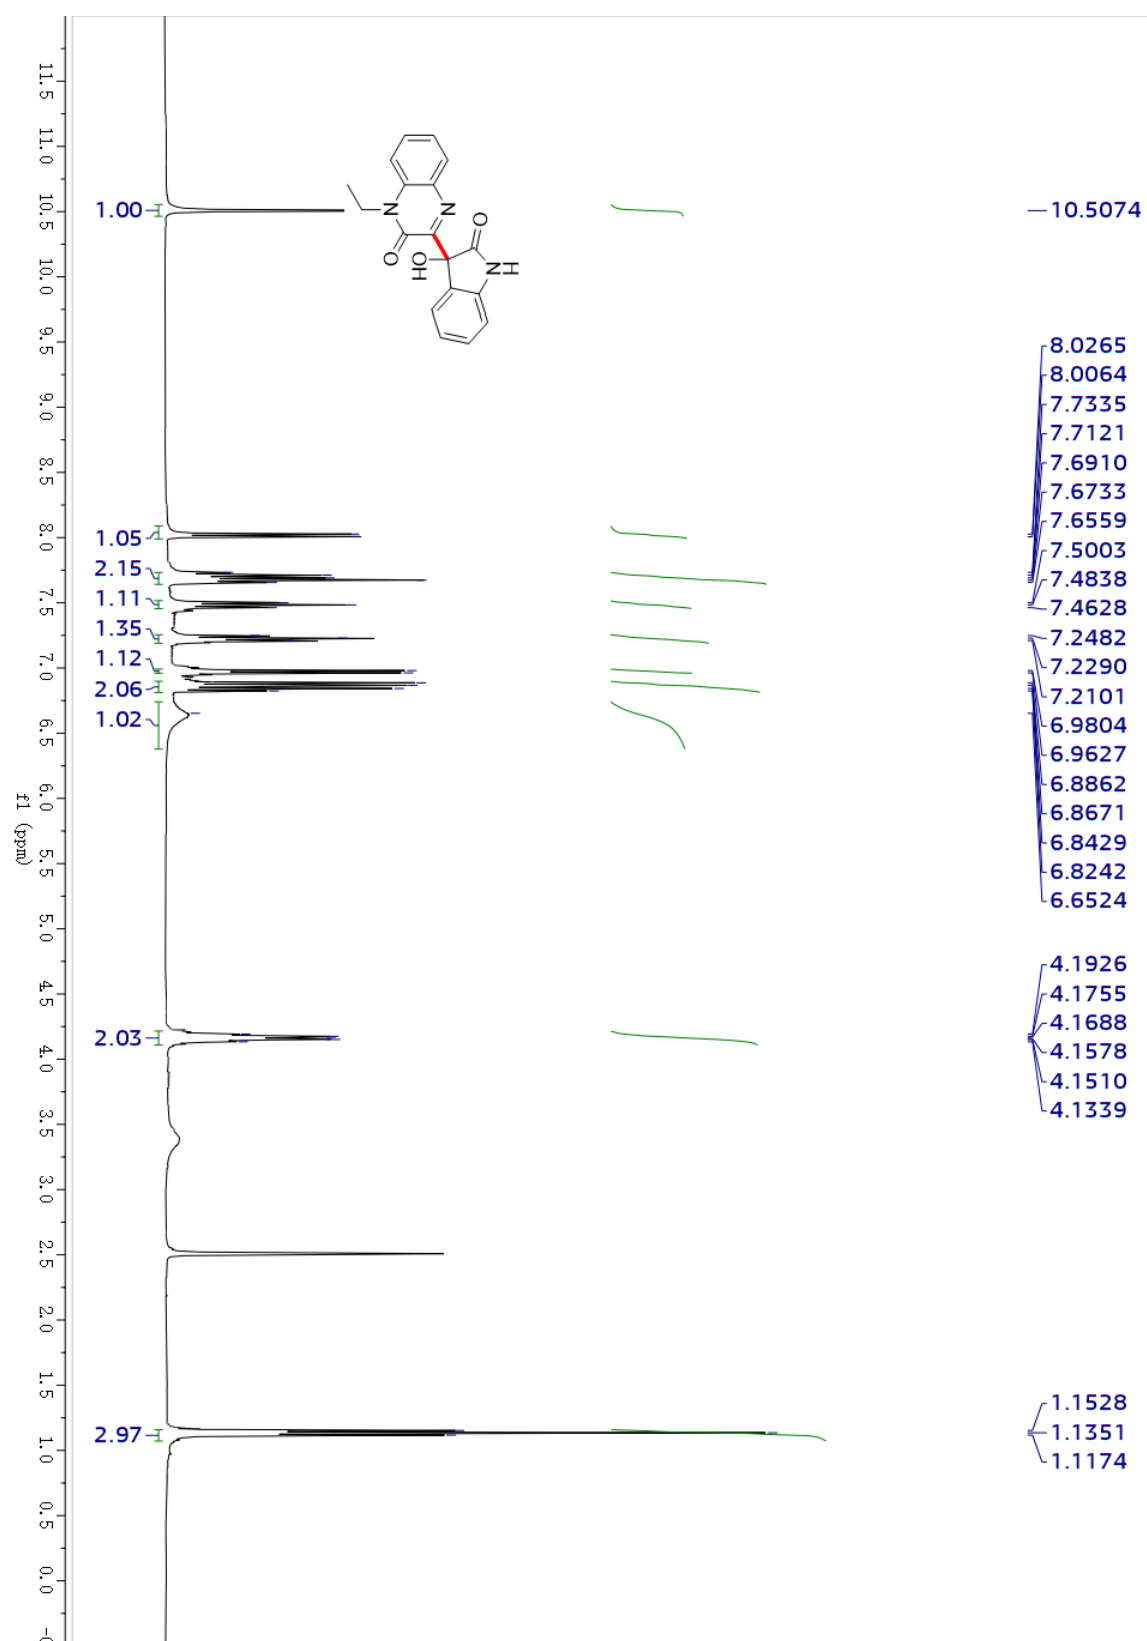

**Figure S27.** The <sup>1</sup>H NMR Spectrum of Compound **3ab** in DMSO-*d*<sub>6</sub>

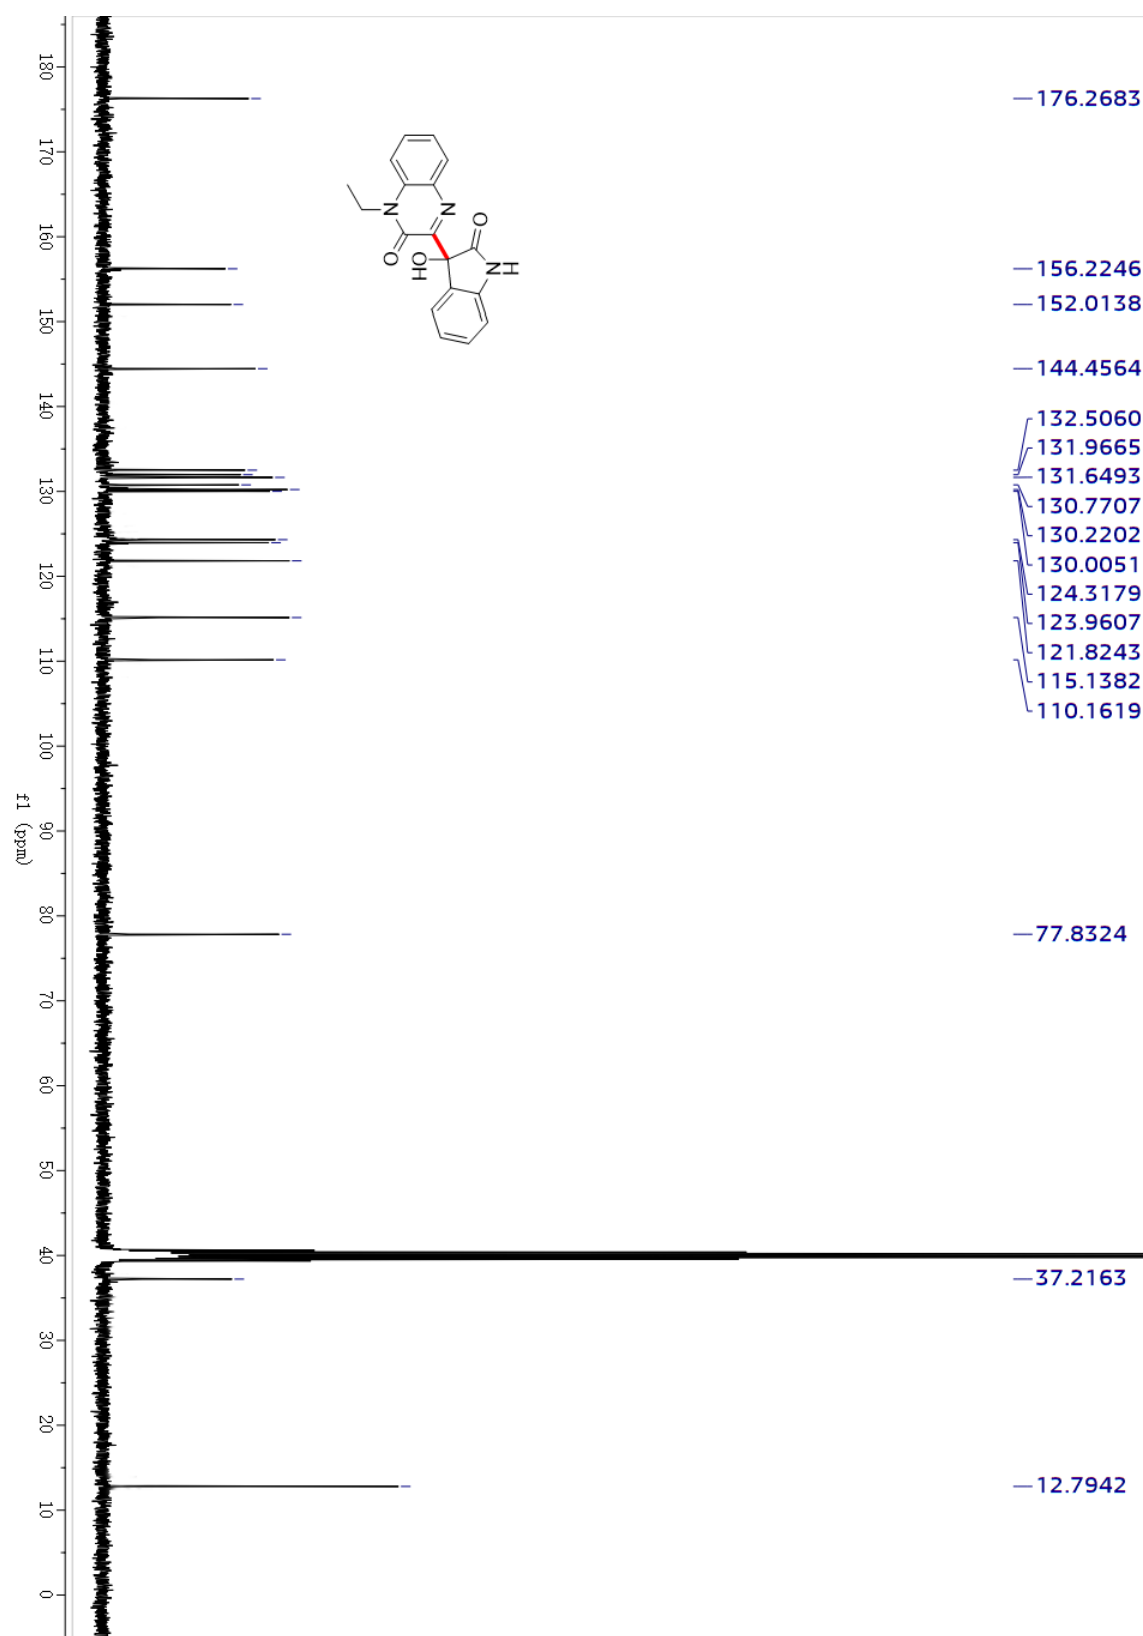

Figure S28. The  $^{13}\text{C}$  NMR Spectrum of Compound **3ab** in  $\text{DMSO}-d_6$

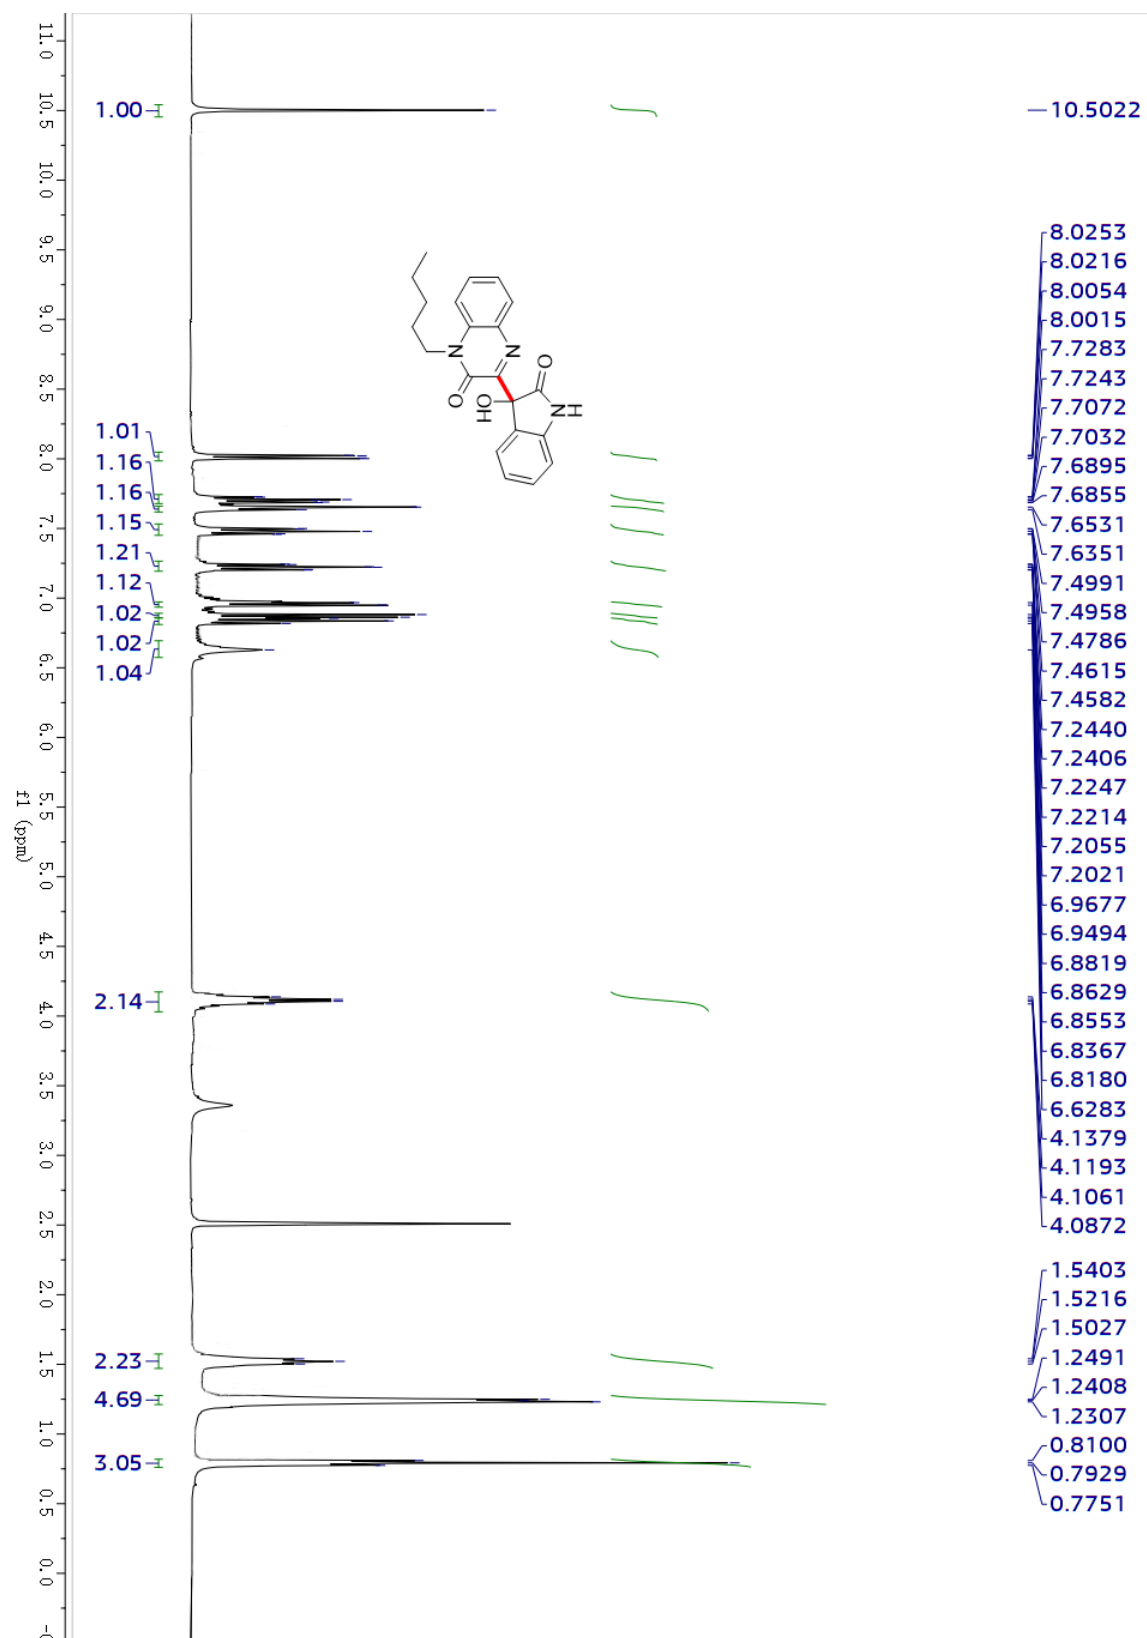

**Figure S29.** The <sup>1</sup>H NMR Spectrum of Compound 3ac in DMSO-*d*<sub>6</sub>

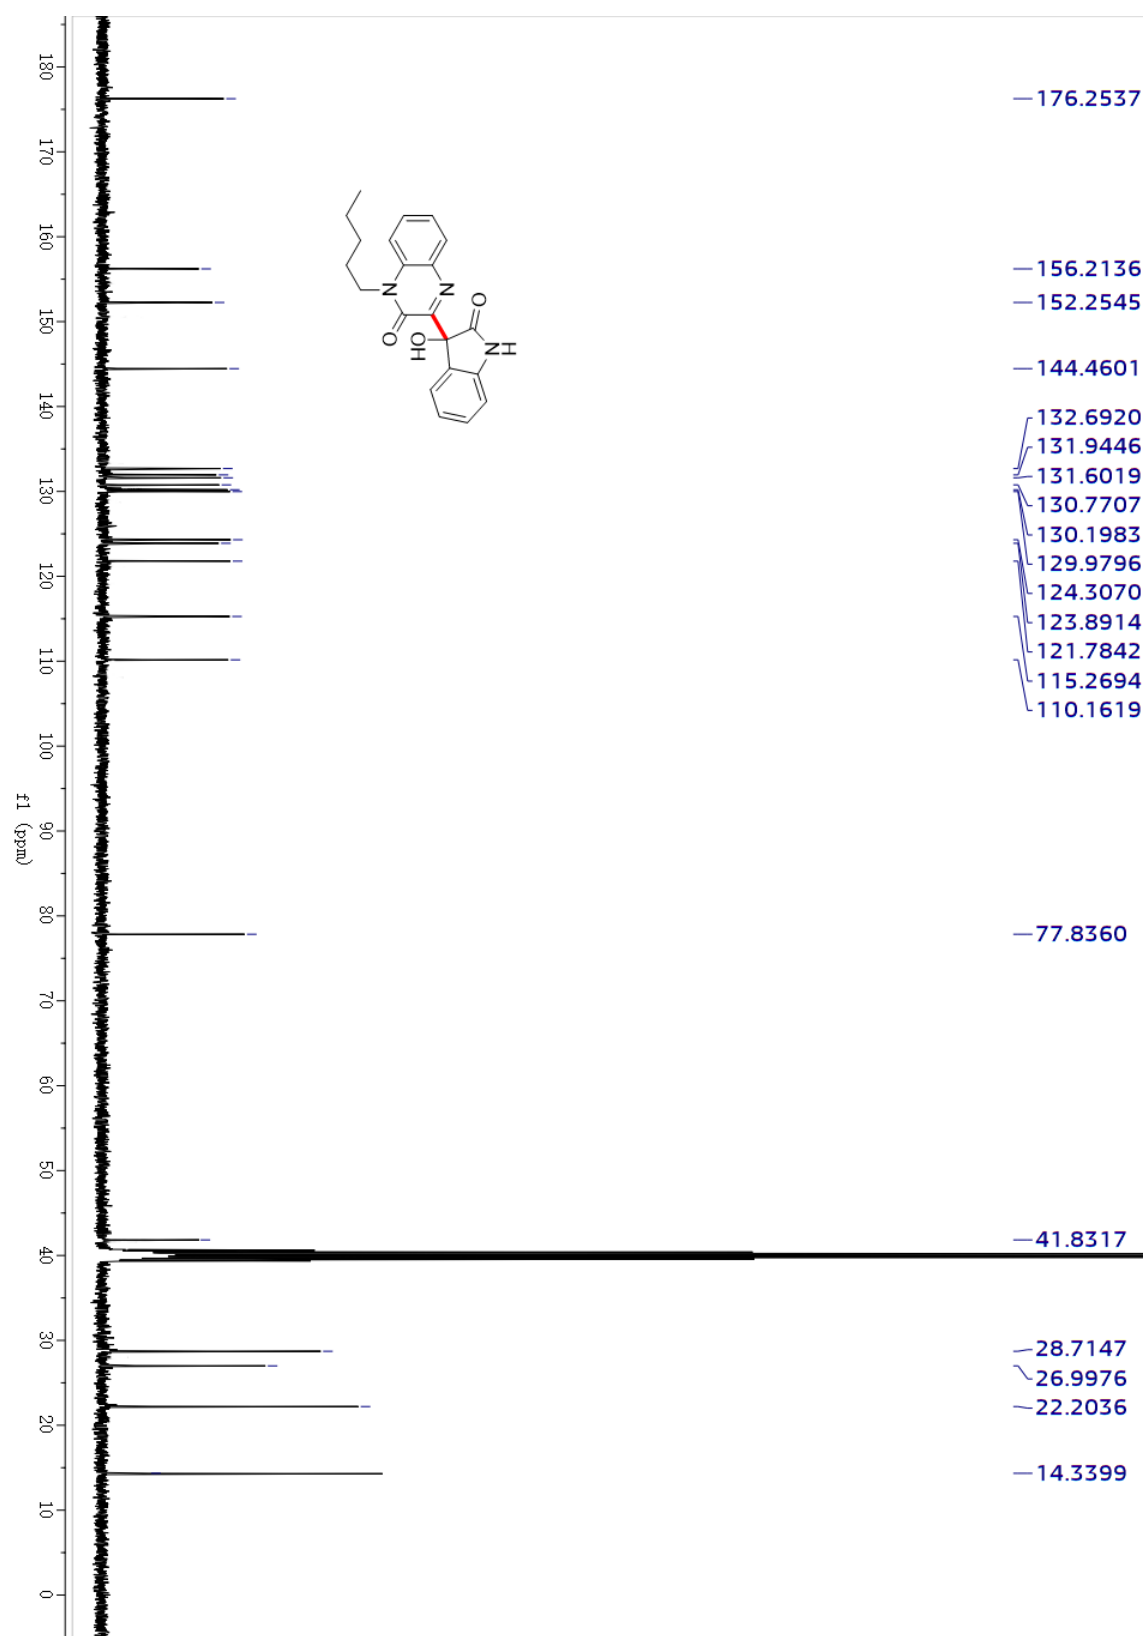

Figure S30. The  $^{13}\text{C}$  NMR Spectrum of Compound **3ac** in  $\text{DMSO}-d_6$

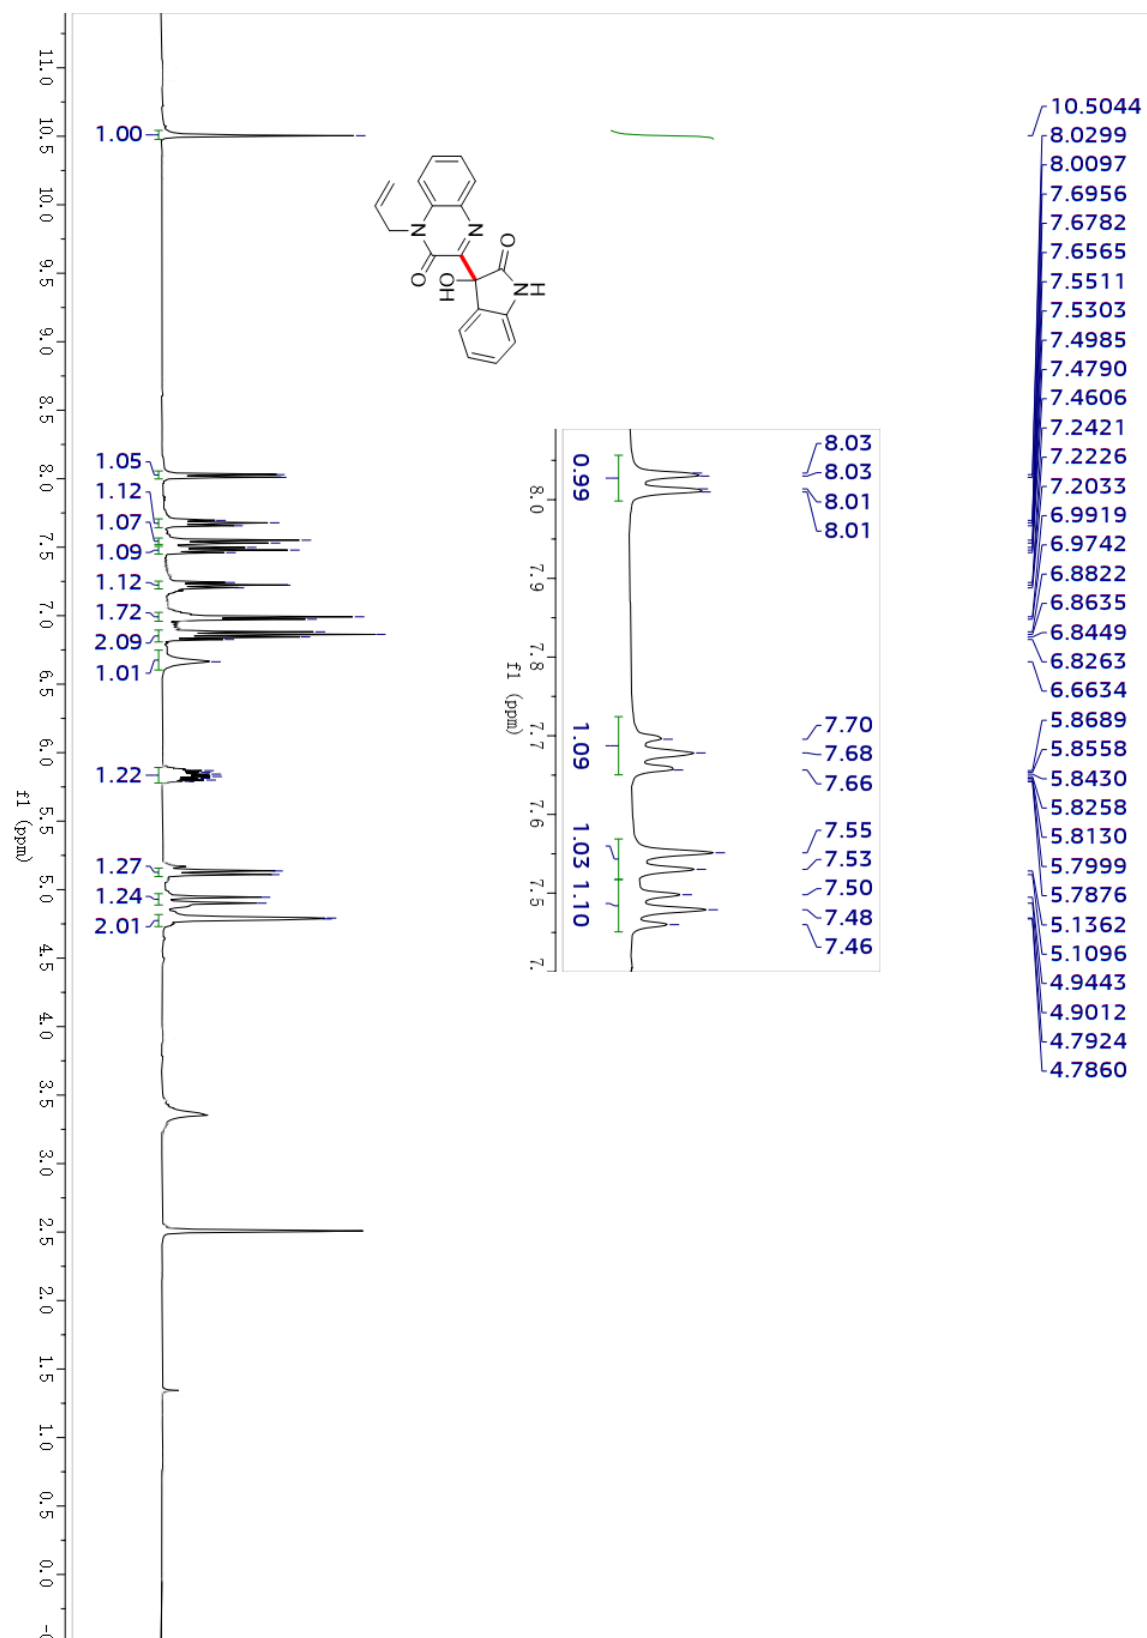

**Figure S31.** The  $^1\text{H}$  NMR Spectrum of Compound **3ad** in  $\text{DMSO}-d_6$

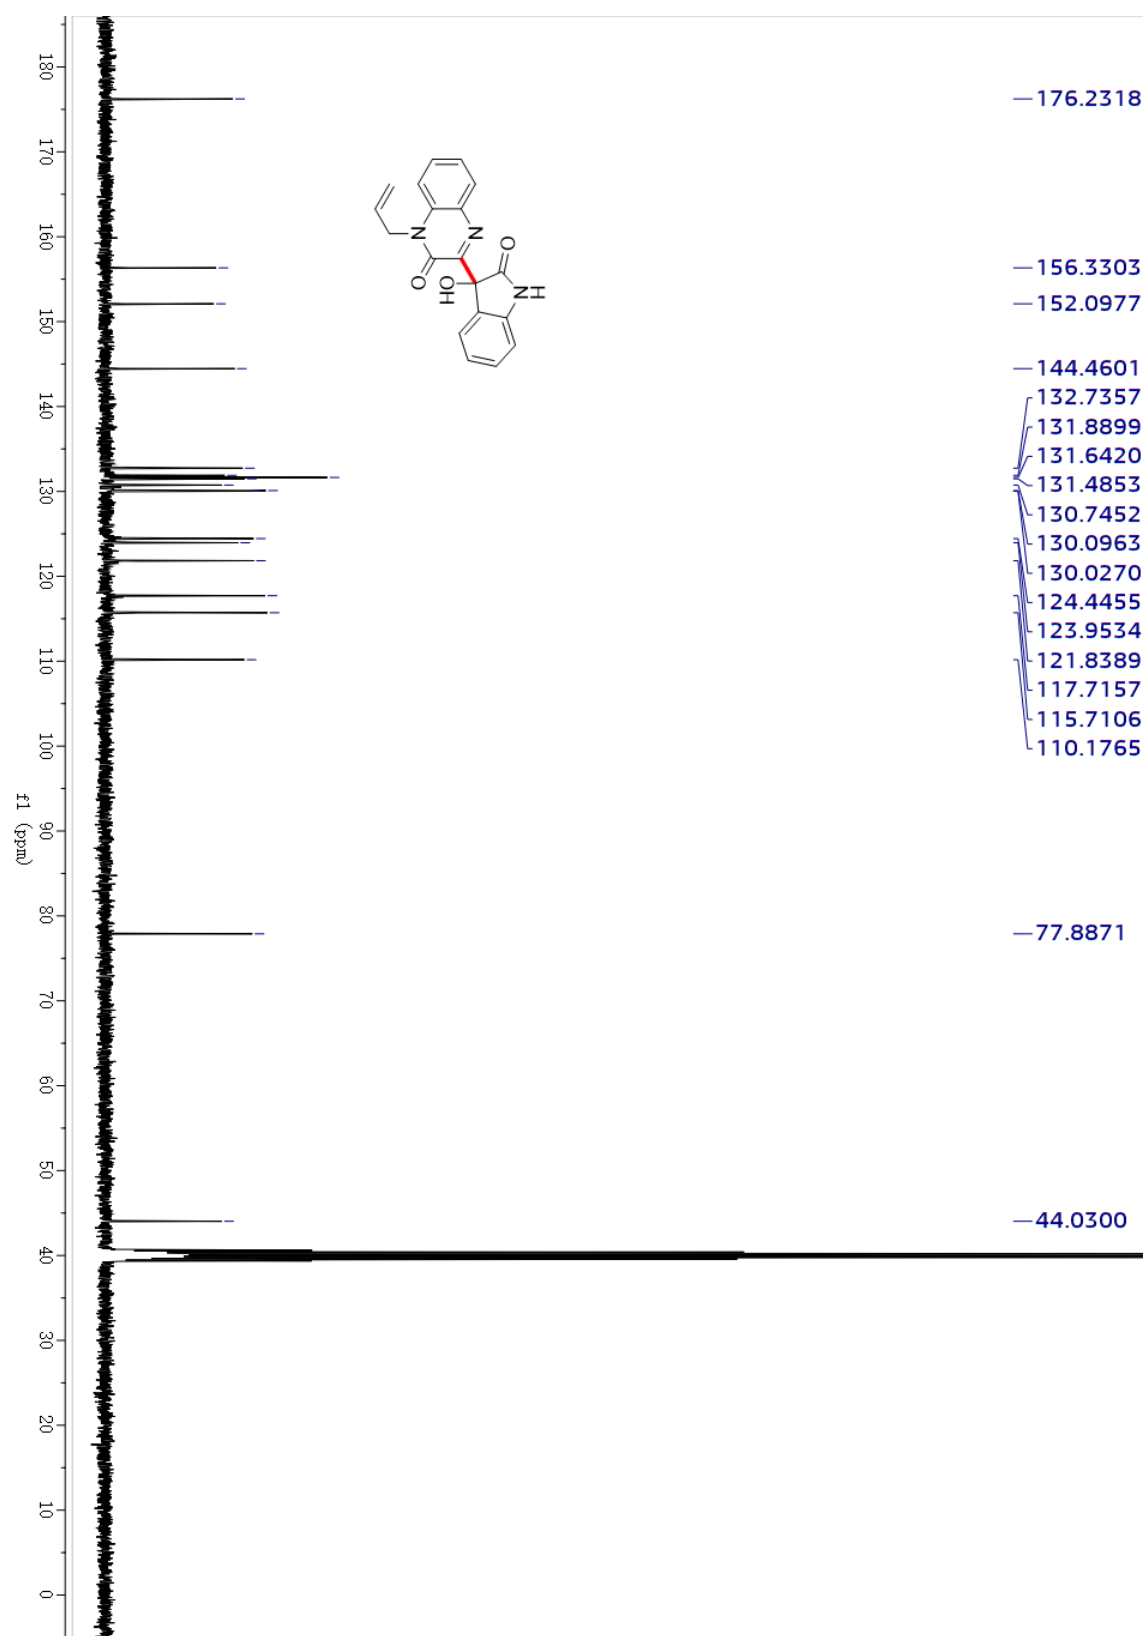

Figure S32. The  $^{13}\text{C}$  NMR Spectrum of Compound **3ad** in  $\text{DMSO}-d_6$

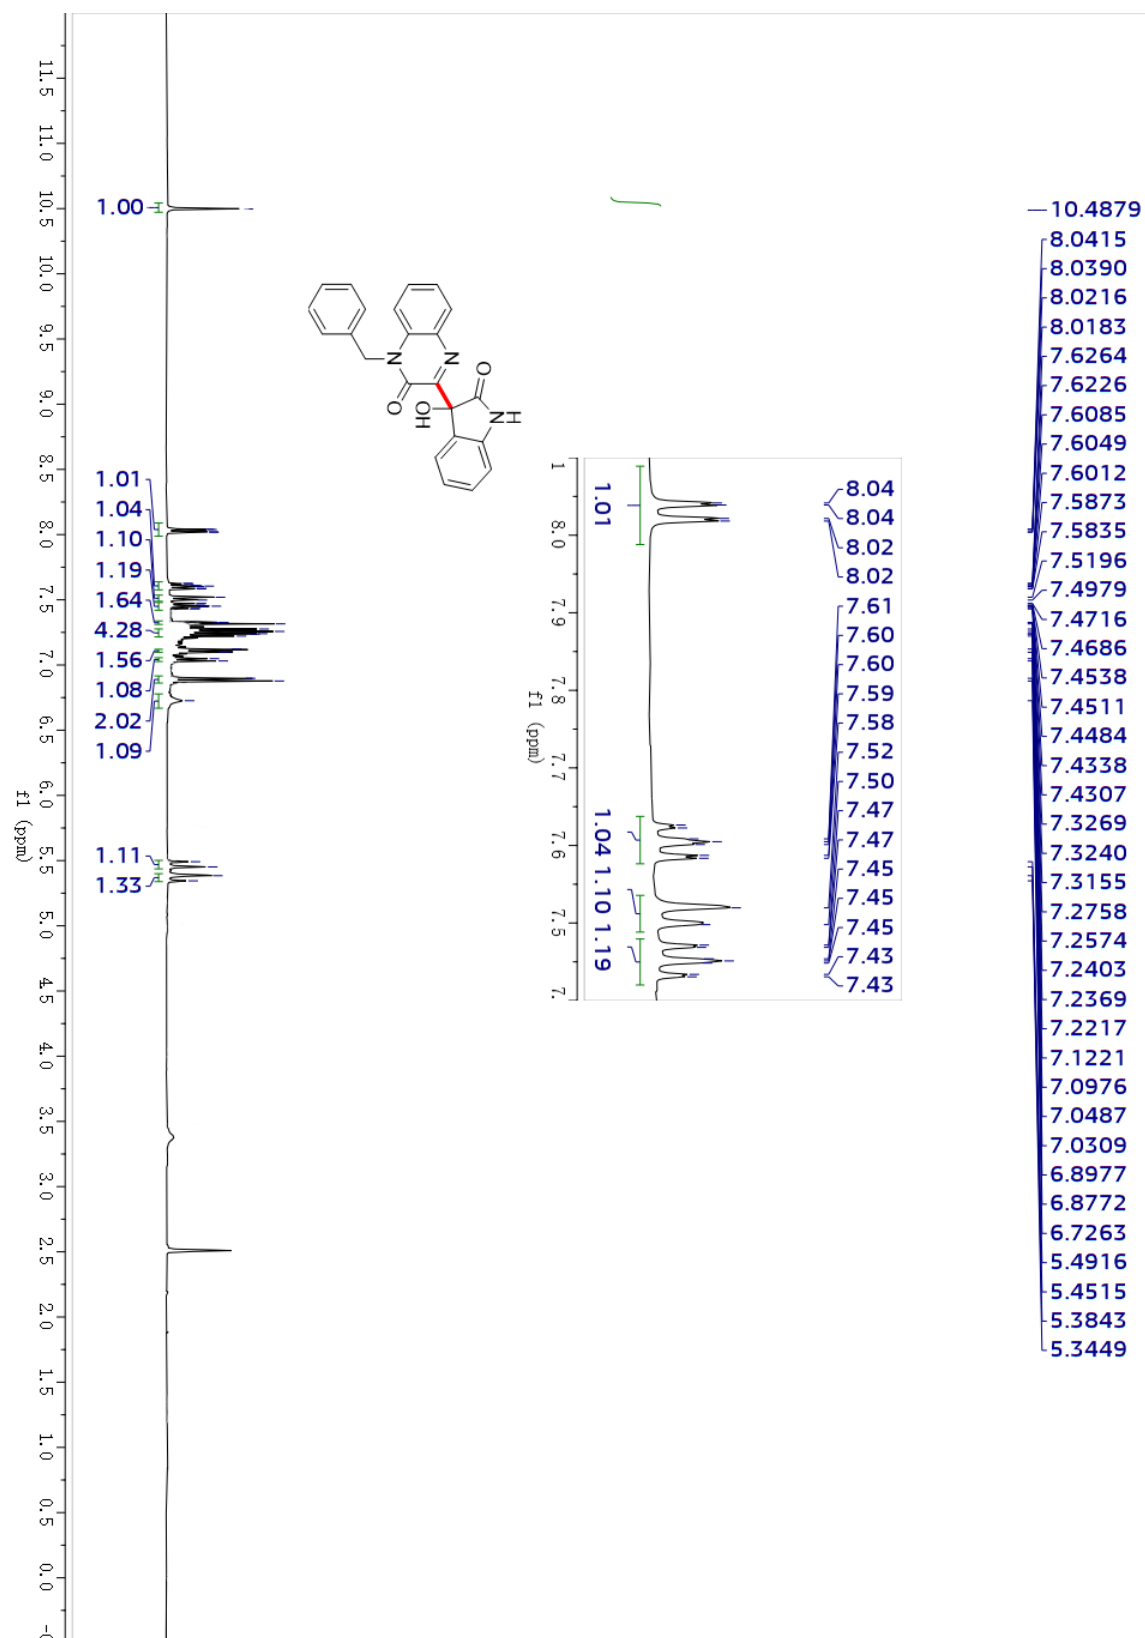

**Figure S33.** The <sup>1</sup>H NMR Spectrum of Compound 3ae in DMSO-*d*<sub>6</sub>

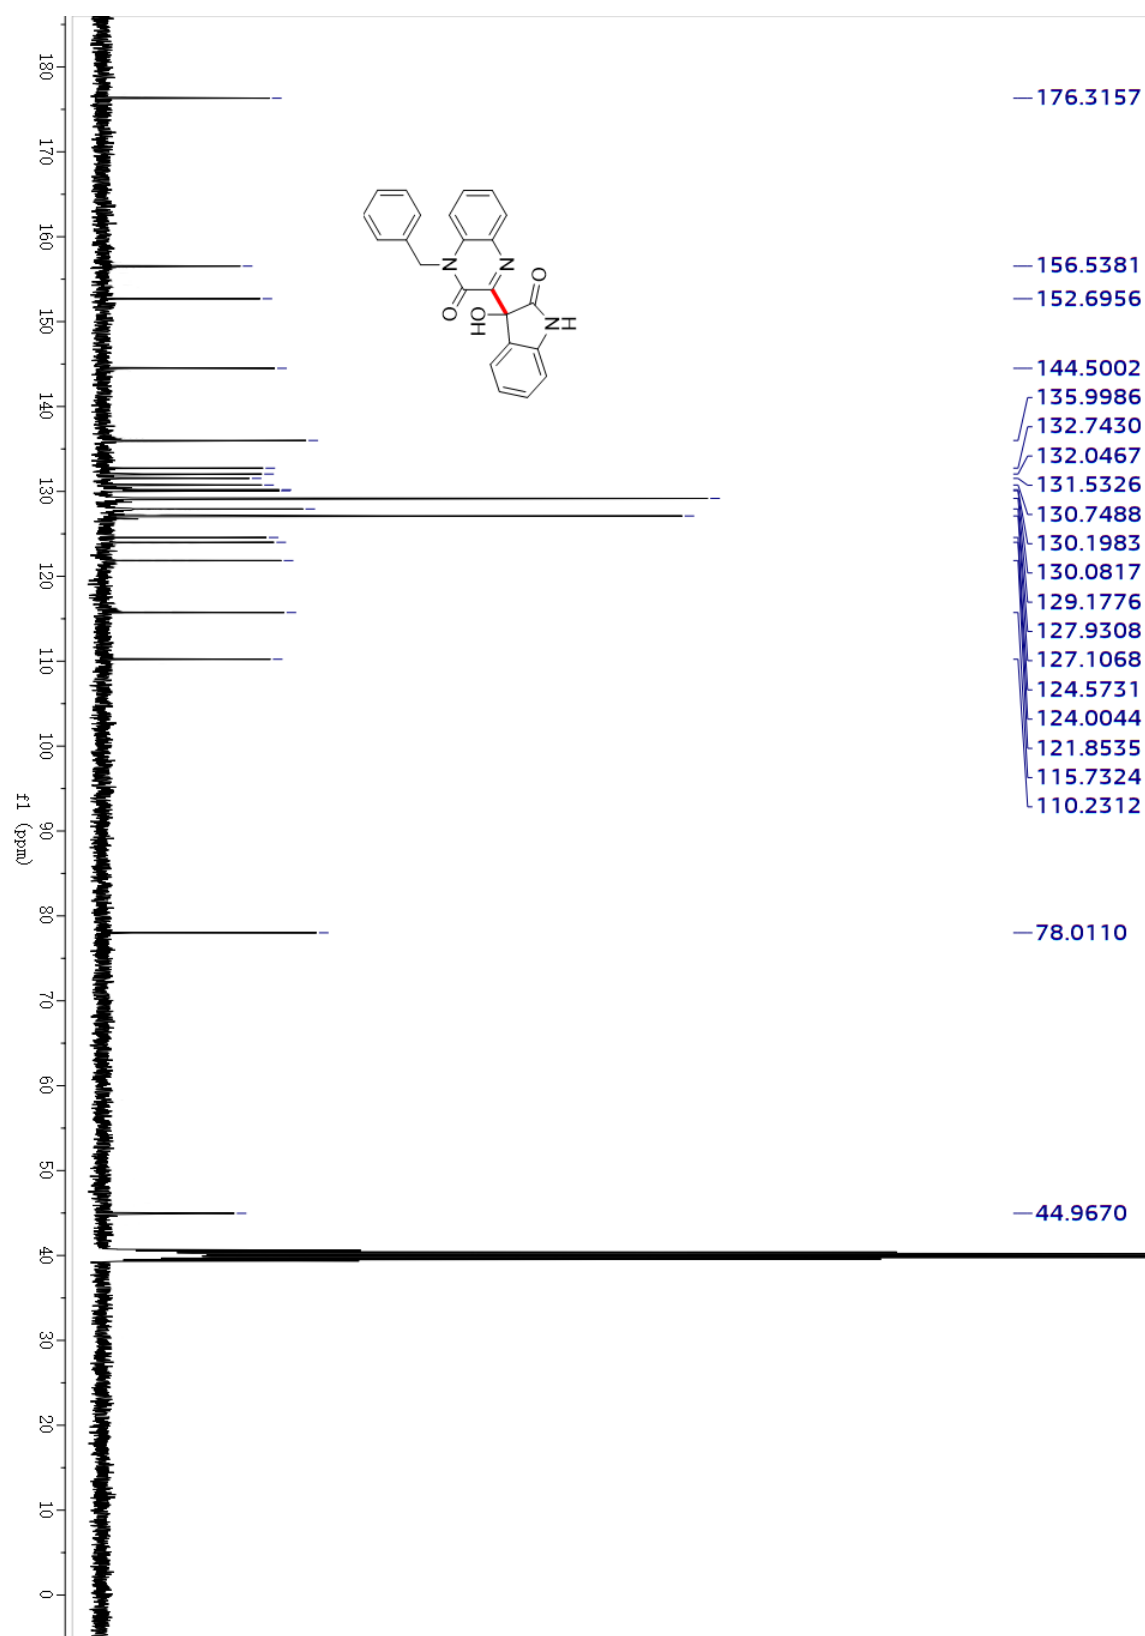

Figure S34. The <sup>13</sup>C NMR Spectrum of Compound 3ae in DMSO-*d*<sub>6</sub>

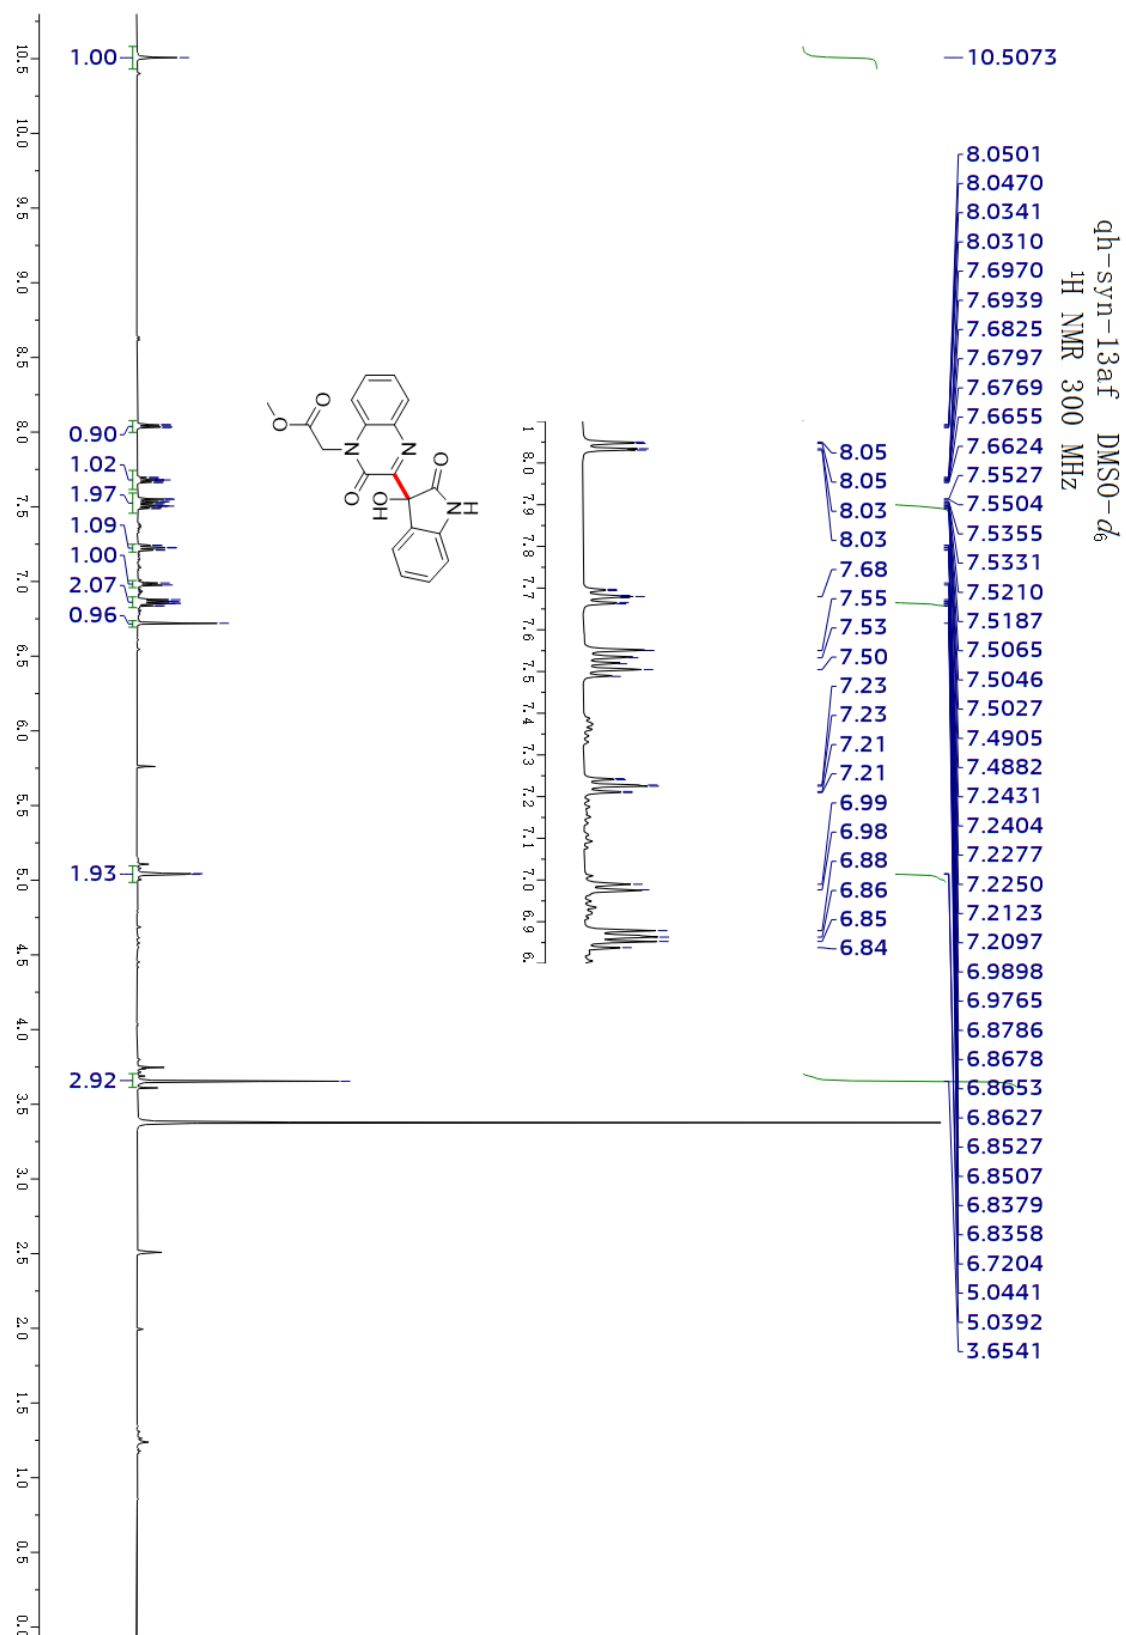

Figure S35. The <sup>1</sup>H NMR Spectrum of Compound 3af in DMSO-*d*<sub>6</sub>

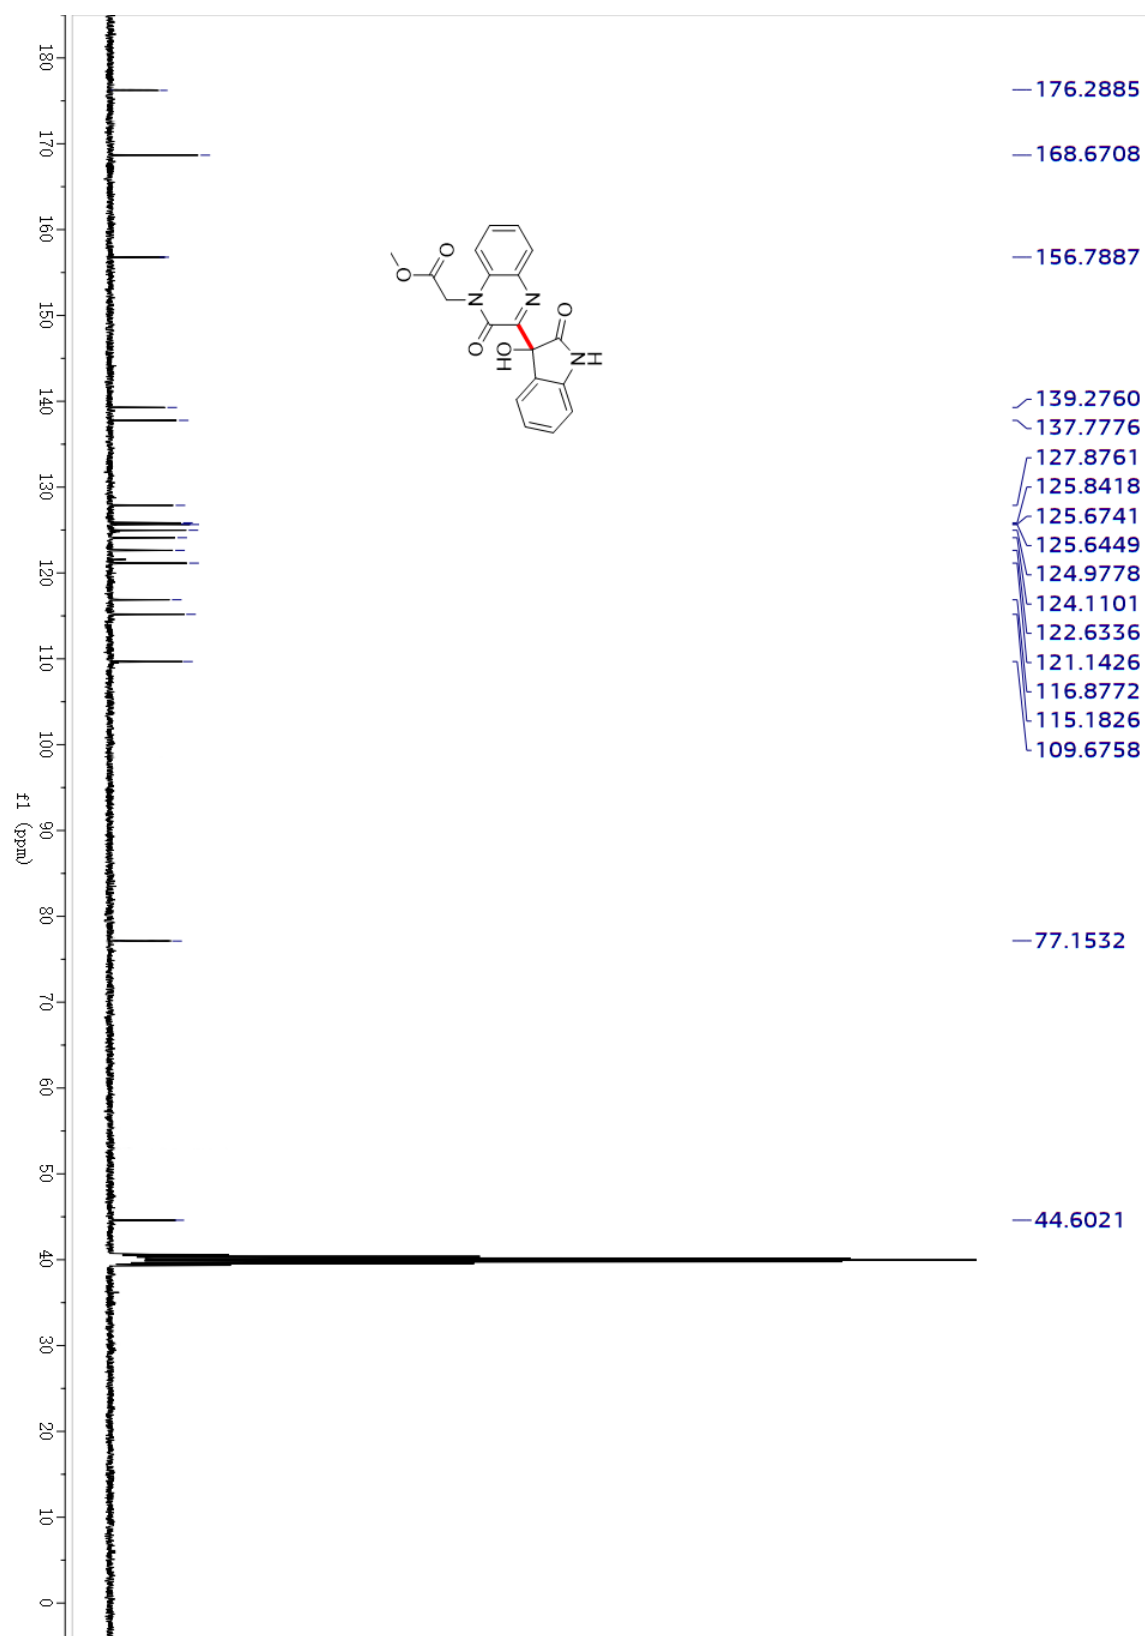

**Figure S36.** The  $^{13}\text{C}$  NMR Spectrum of Compound **3af** in  $\text{DMSO}-d_6$

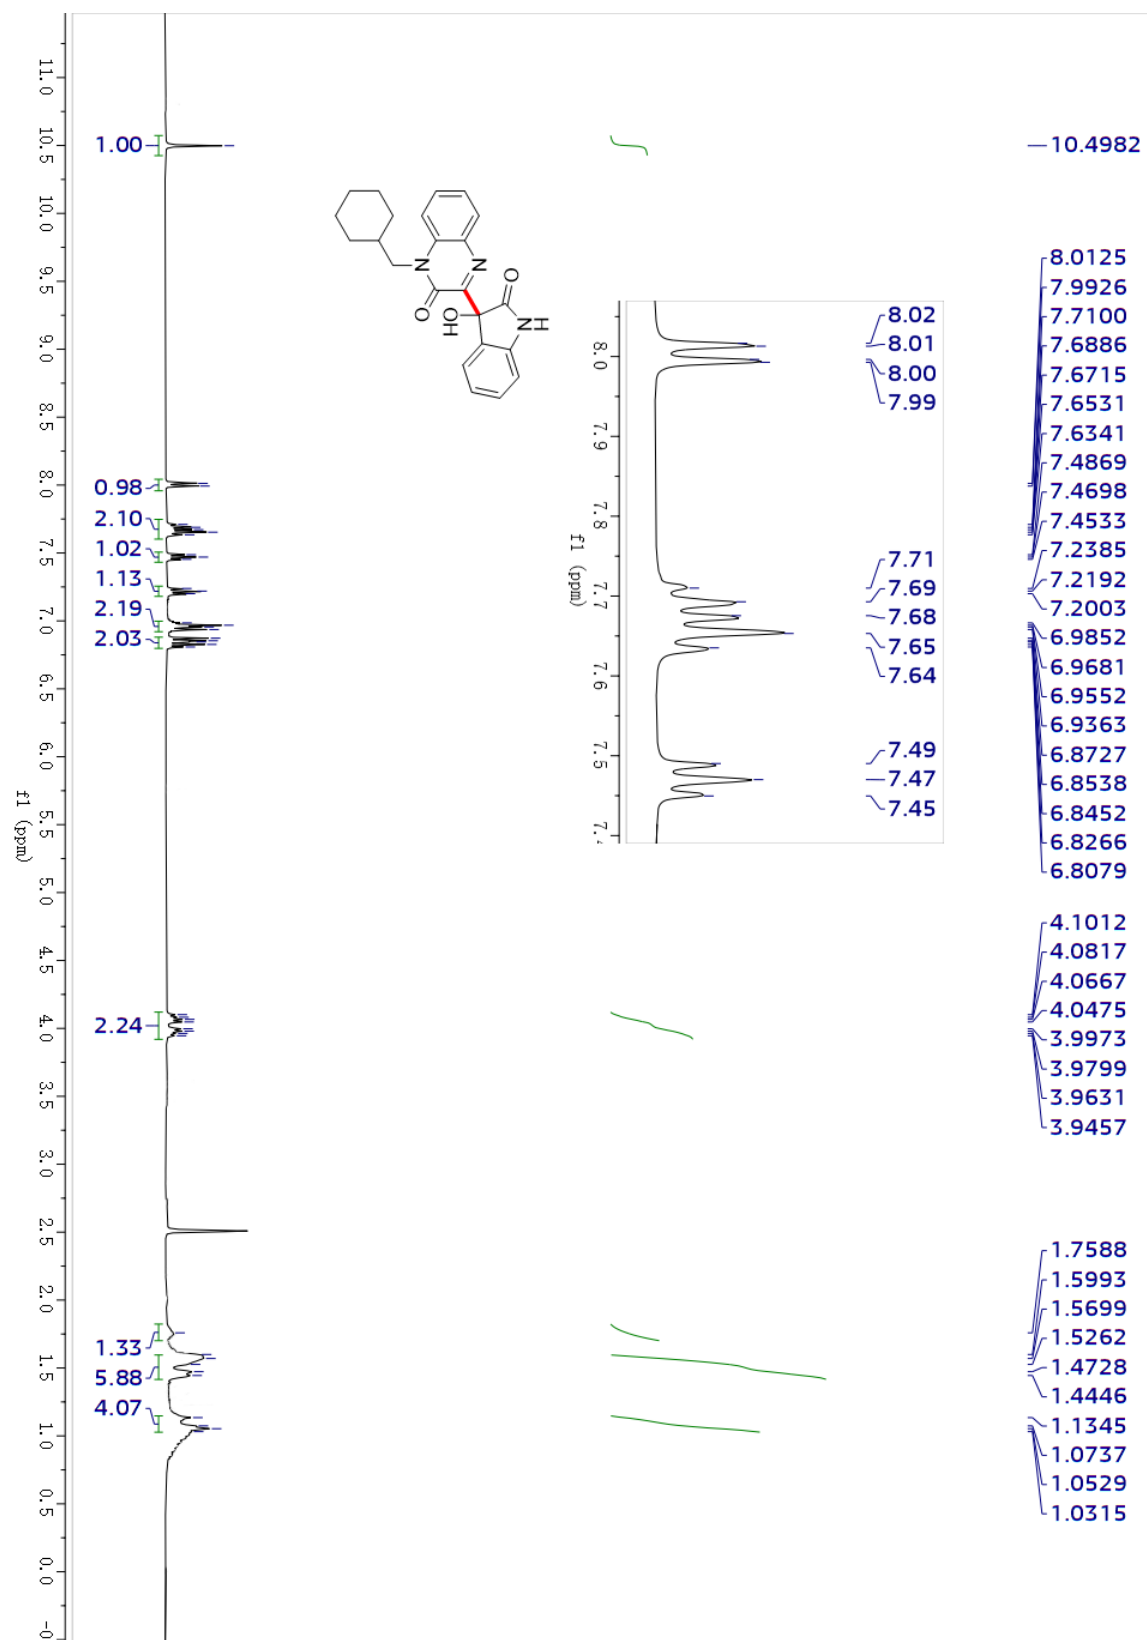

**Figure S37.** The  $^1\text{H}$  NMR Spectrum of Compound **3ag** in  $\text{DMSO-}d_6$

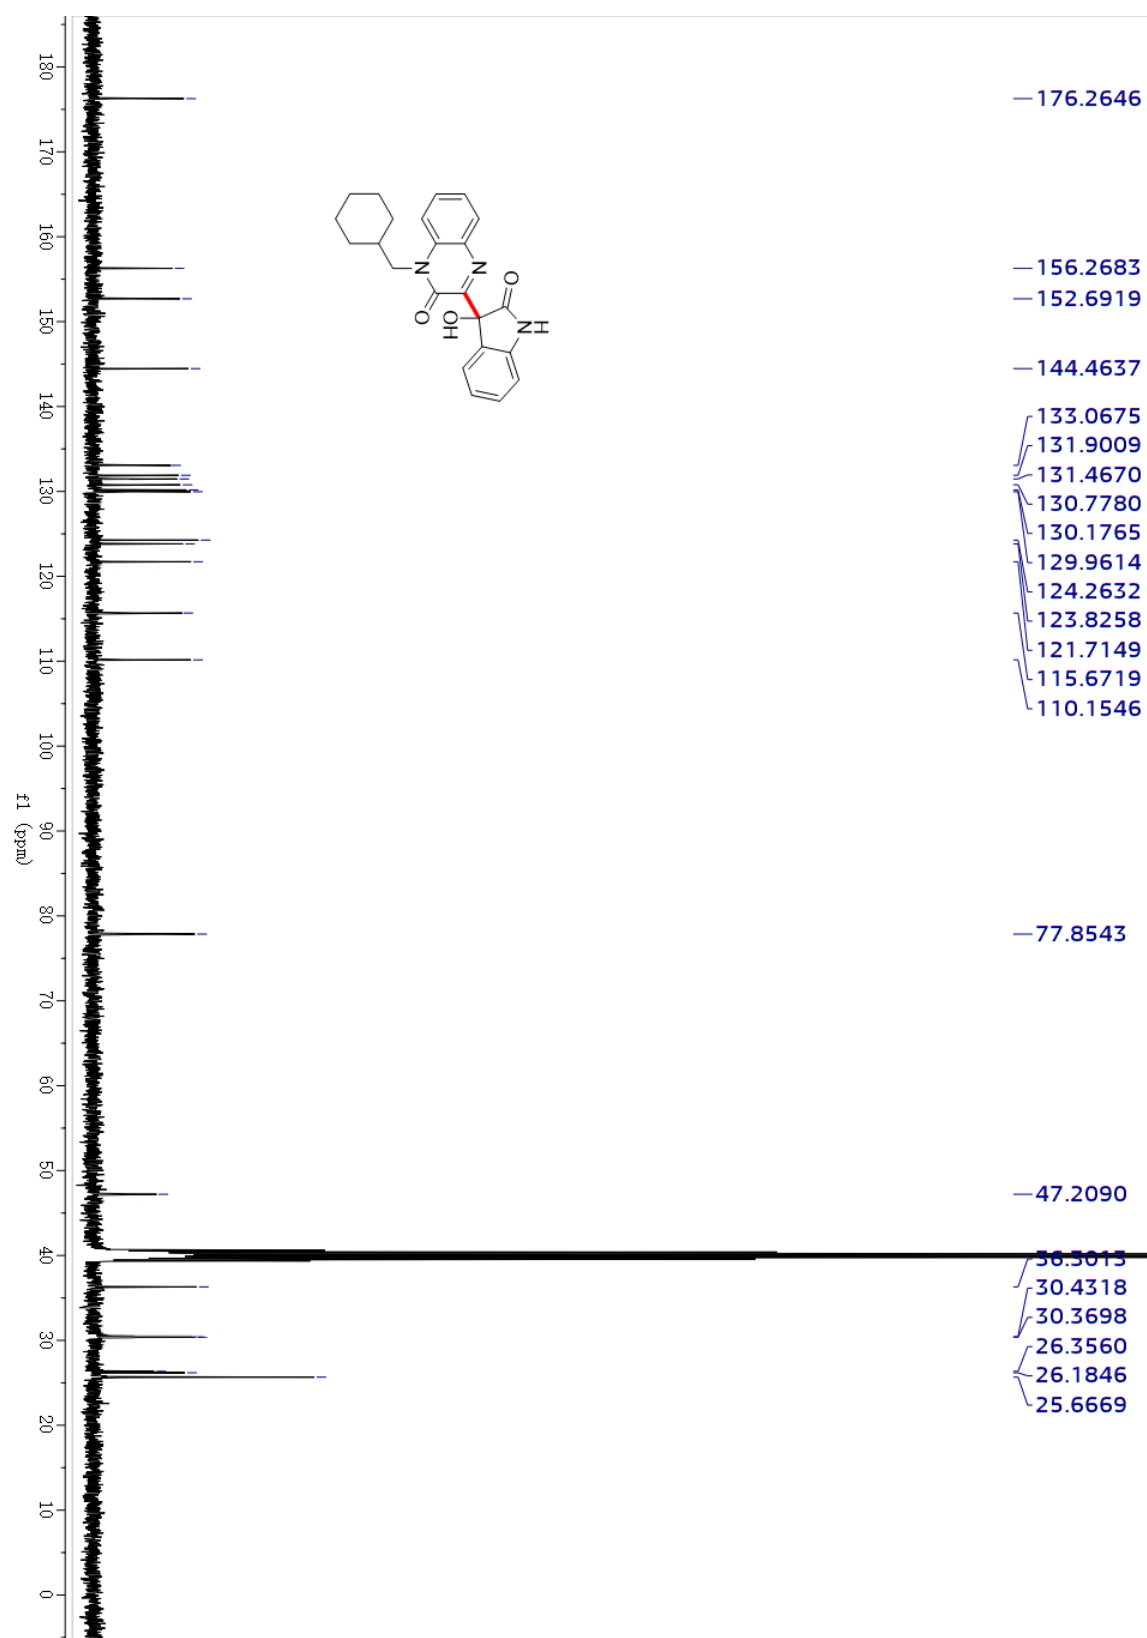

**Figure S38.** The  $^{13}\text{C}$  NMR Spectrum of Compound **3ag** in  $\text{DMSO}-d_6$

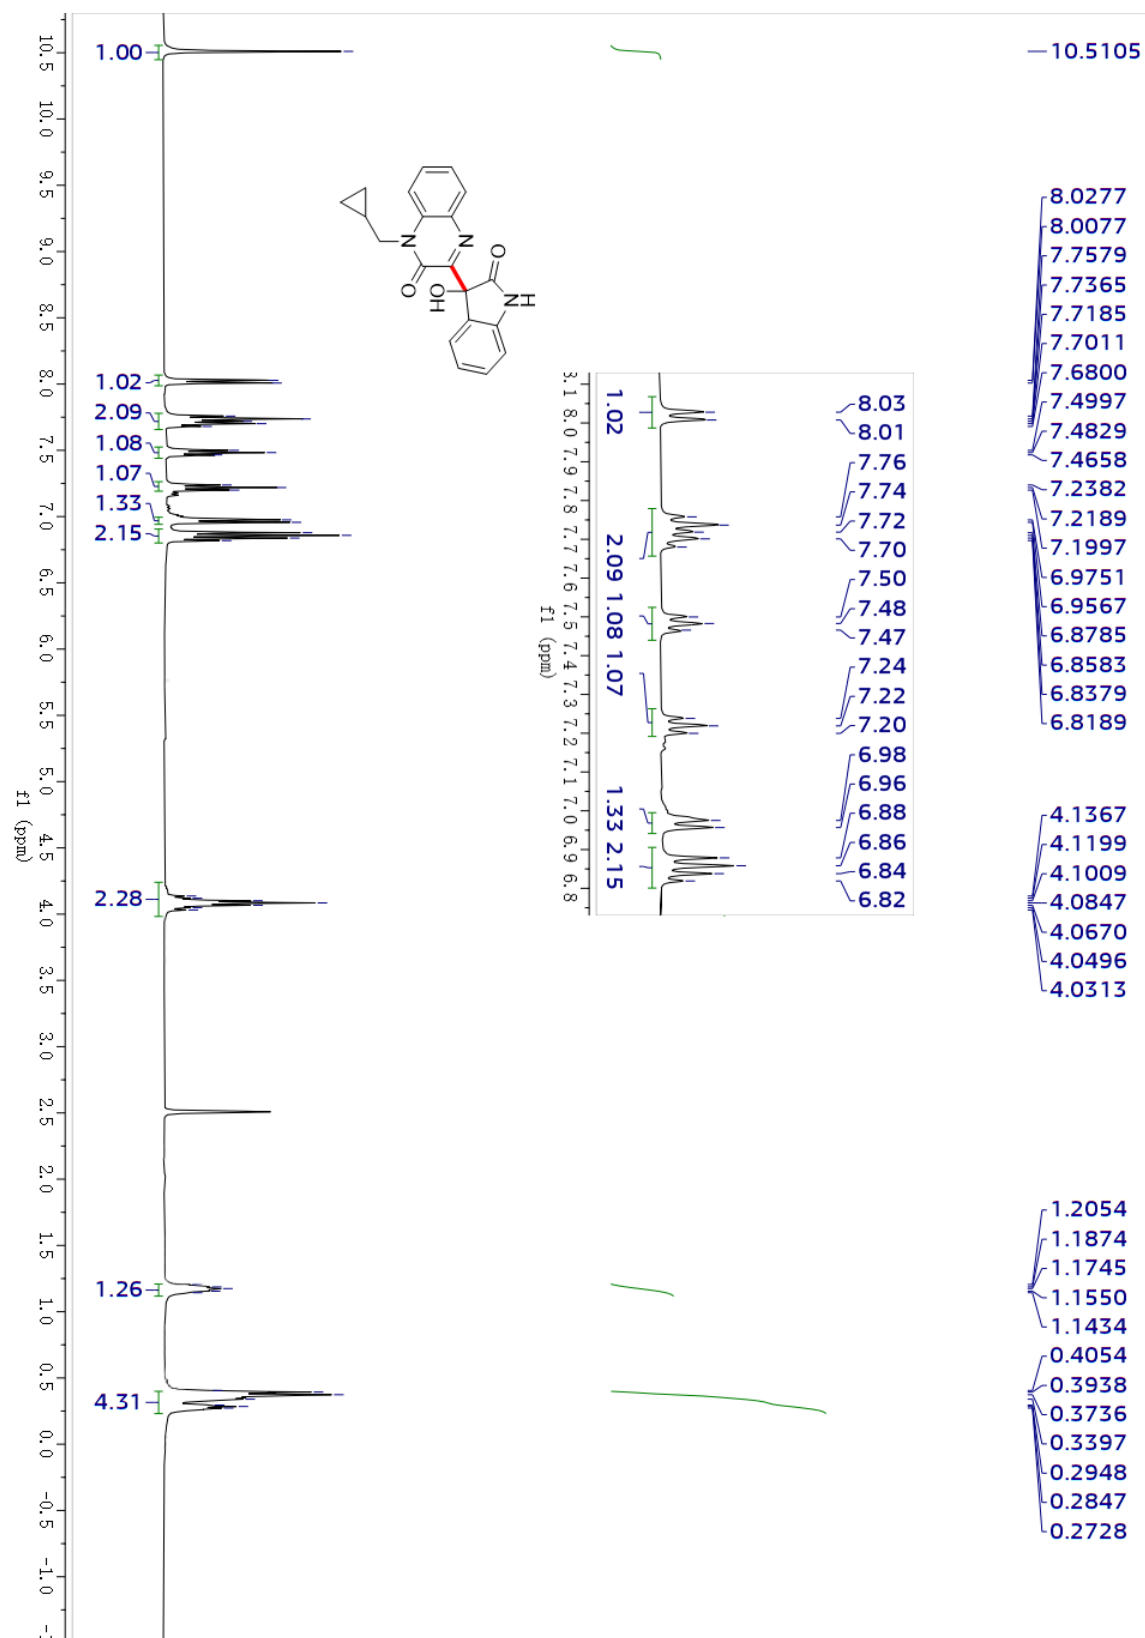

**Figure S39.** The <sup>1</sup>H NMR Spectrum of Compound **3ah** in DMSO-*d*<sub>6</sub>

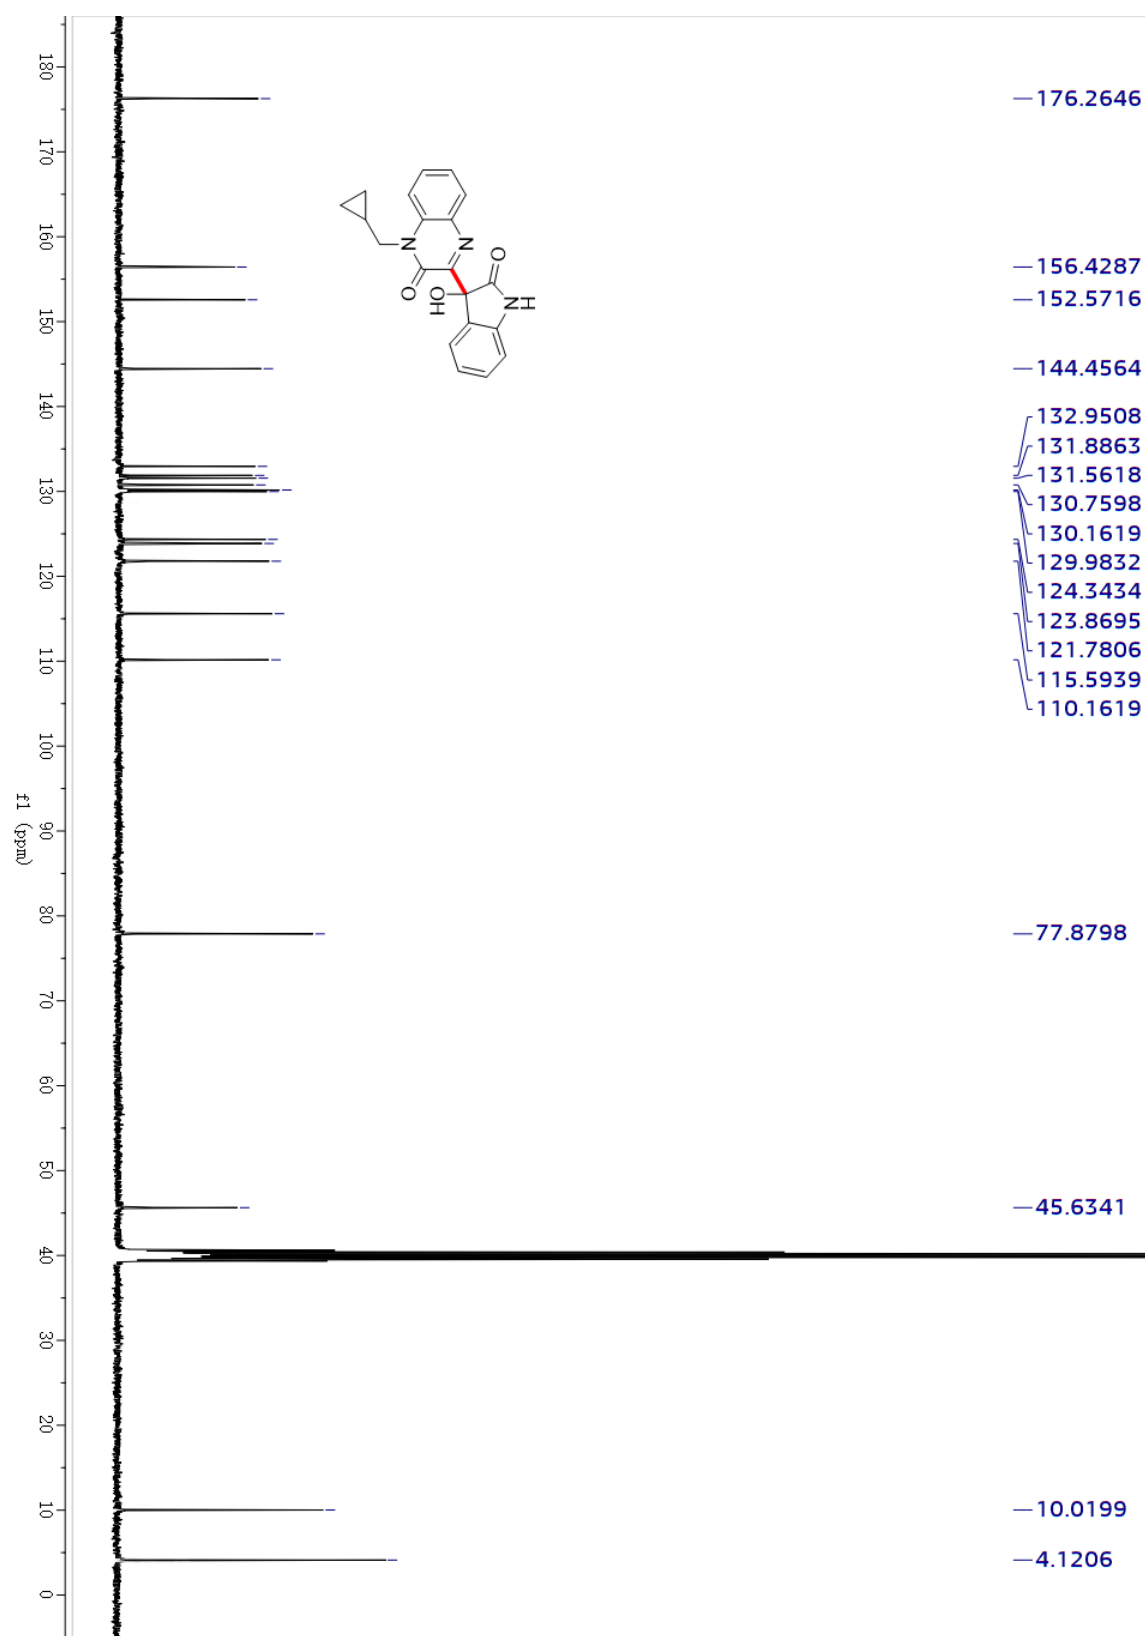

**Figure S40.** The <sup>13</sup>C NMR Spectrum of Compound **3ah** in DMSO-*d*<sub>6</sub>

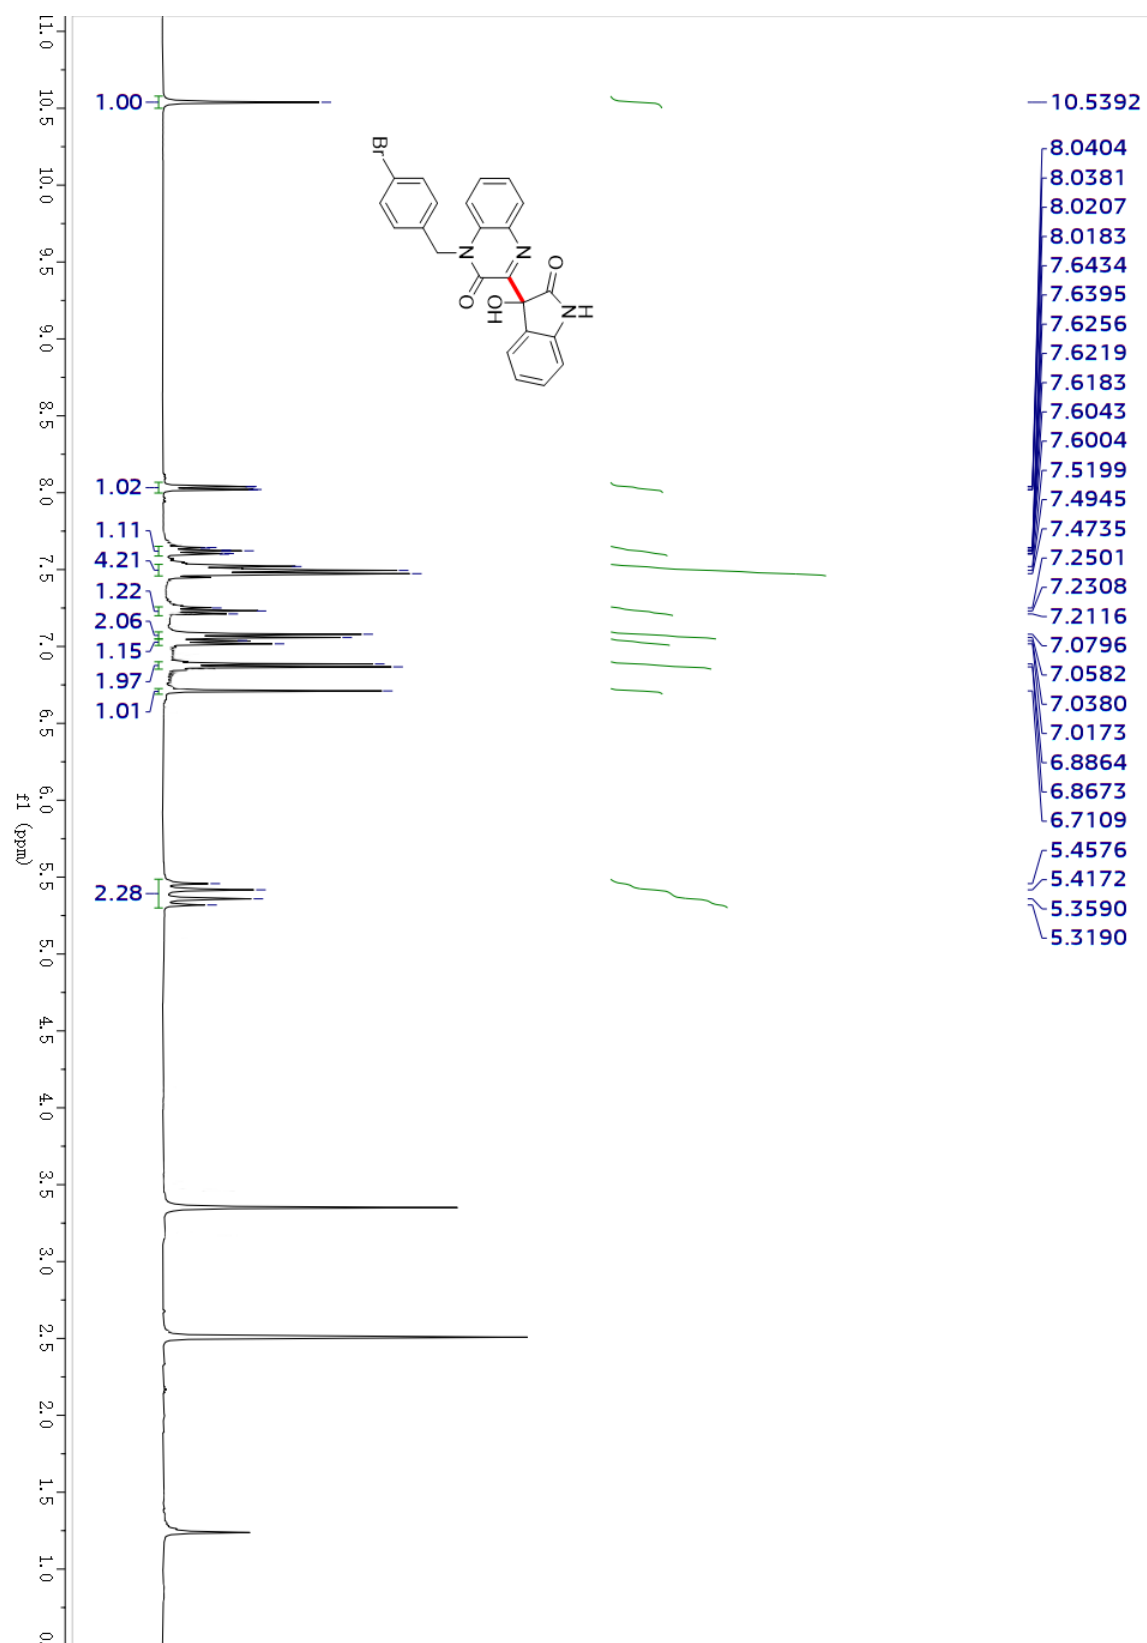

**Figure S41.** The  $^1\text{H}$  NMR Spectrum of Compound **3ai** in  $\text{DMSO}-d_6$

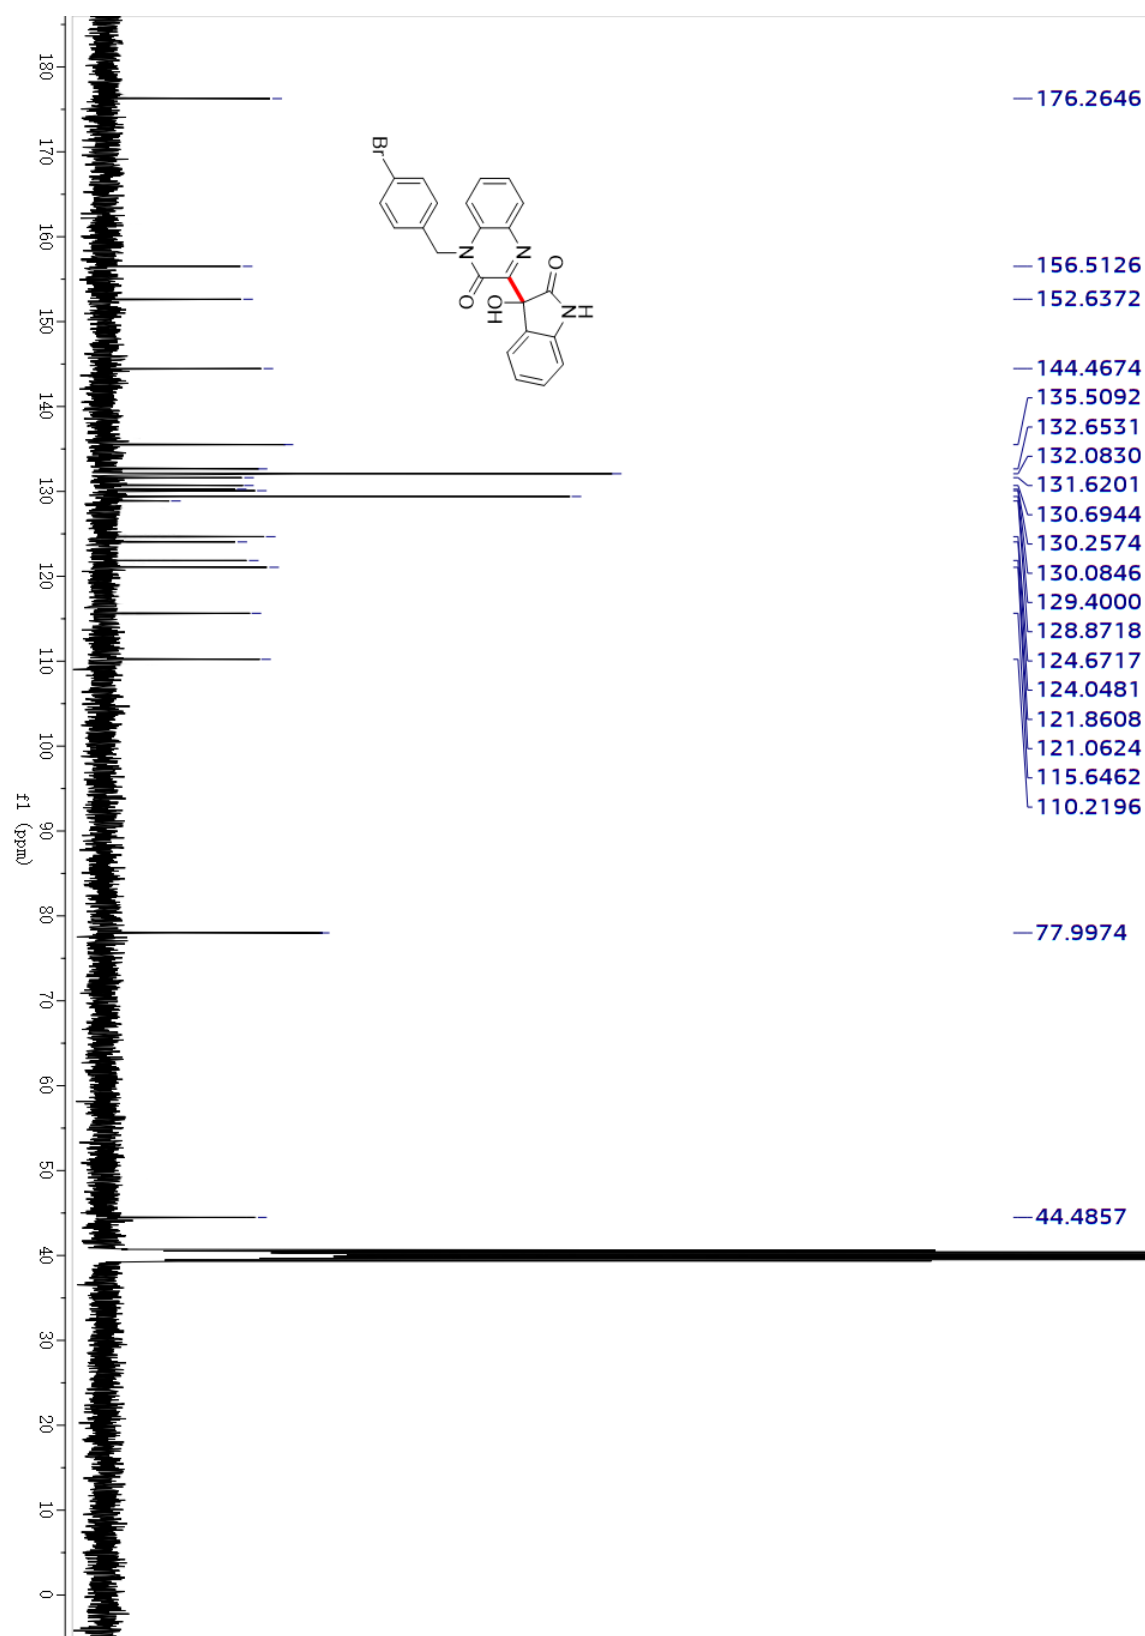

Figure S42. The  $^{13}\text{C}$  NMR Spectrum of Compound **3ai** in  $\text{DMSO}-d_6$

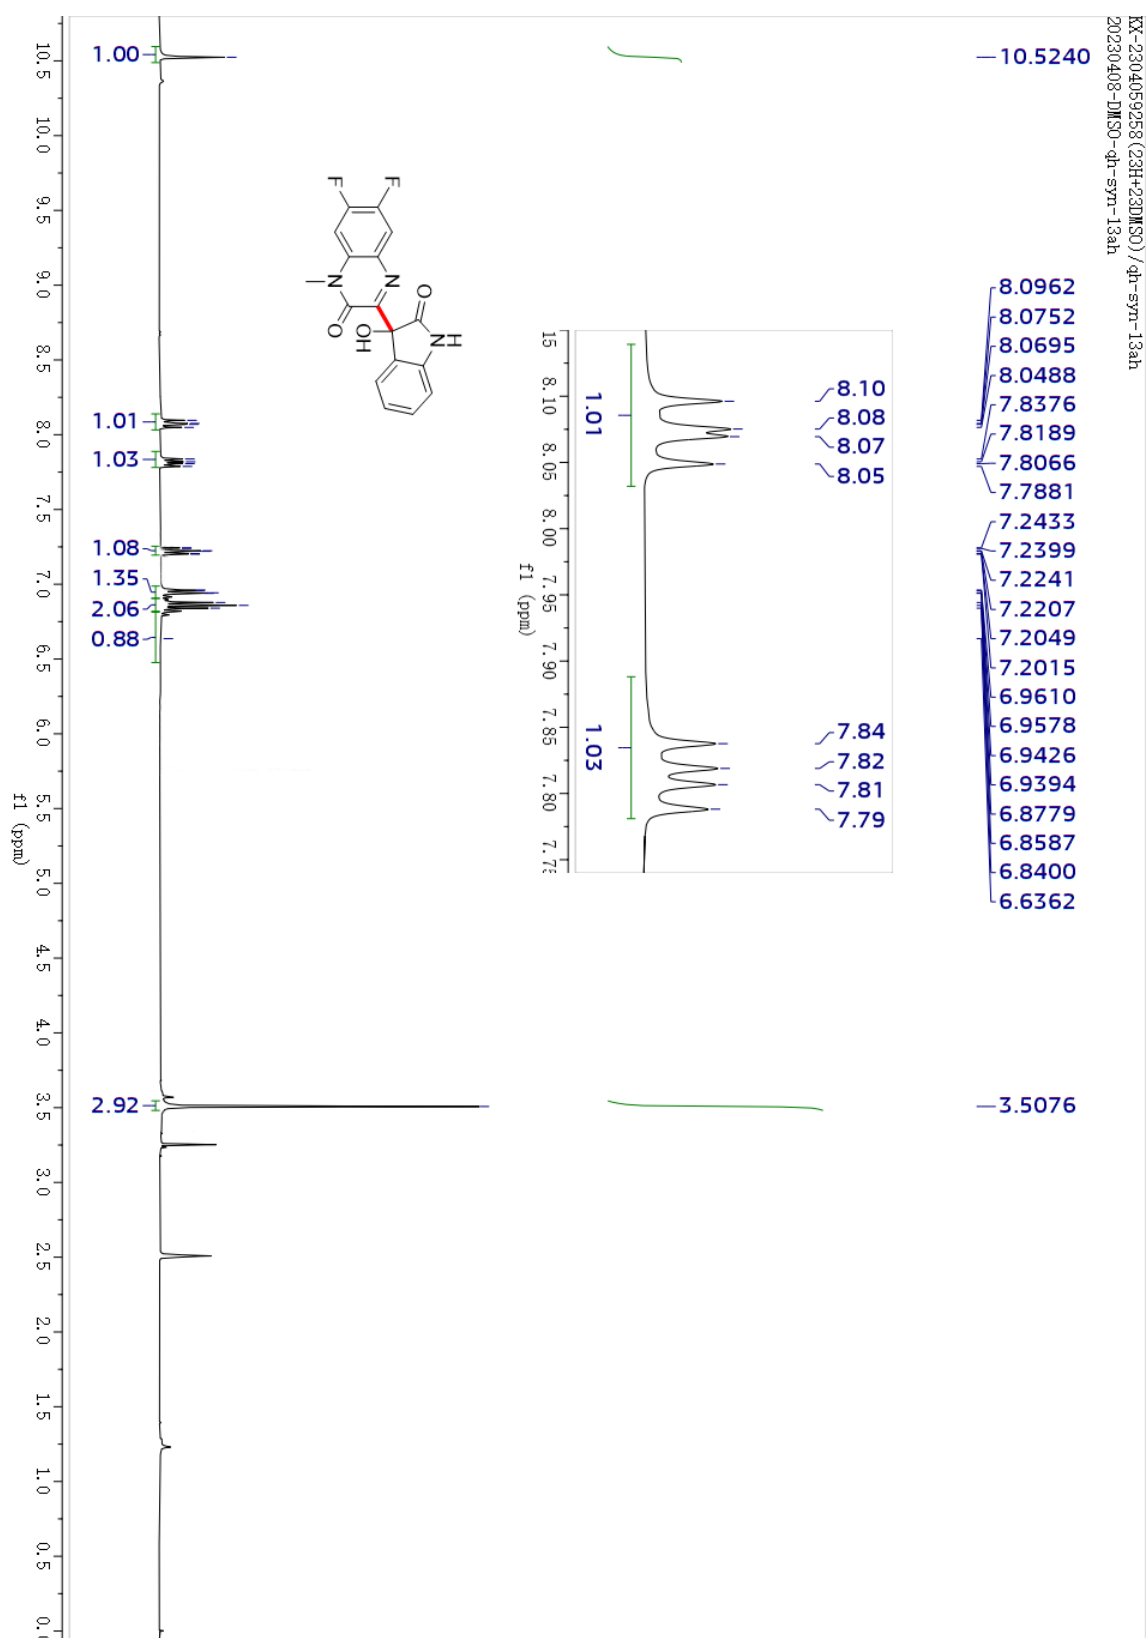

**Figure S43.** The  $^1\text{H}$  NMR Spectrum of Compound **3aj** in  $\text{DMSO-}d_6$

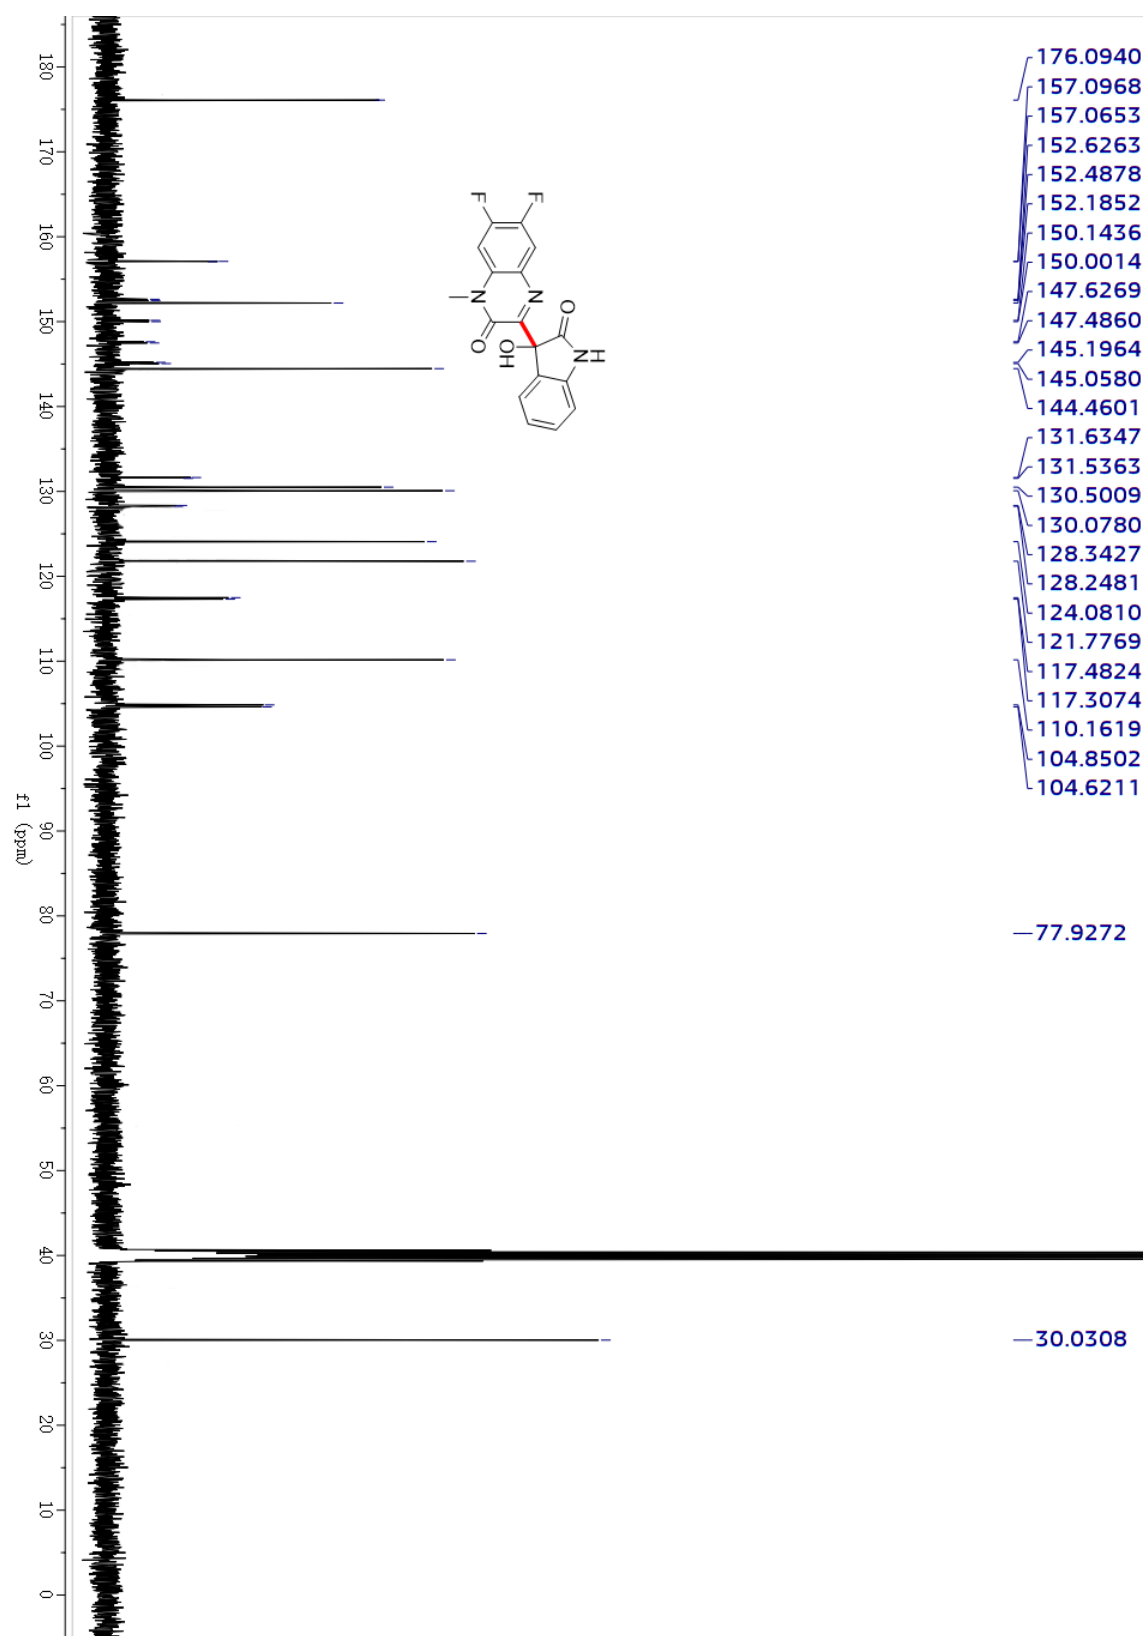

Figure S44. The  $^{13}\text{C}$  NMR Spectrum of Compound **3aj** in  $\text{DMSO}-d_6$

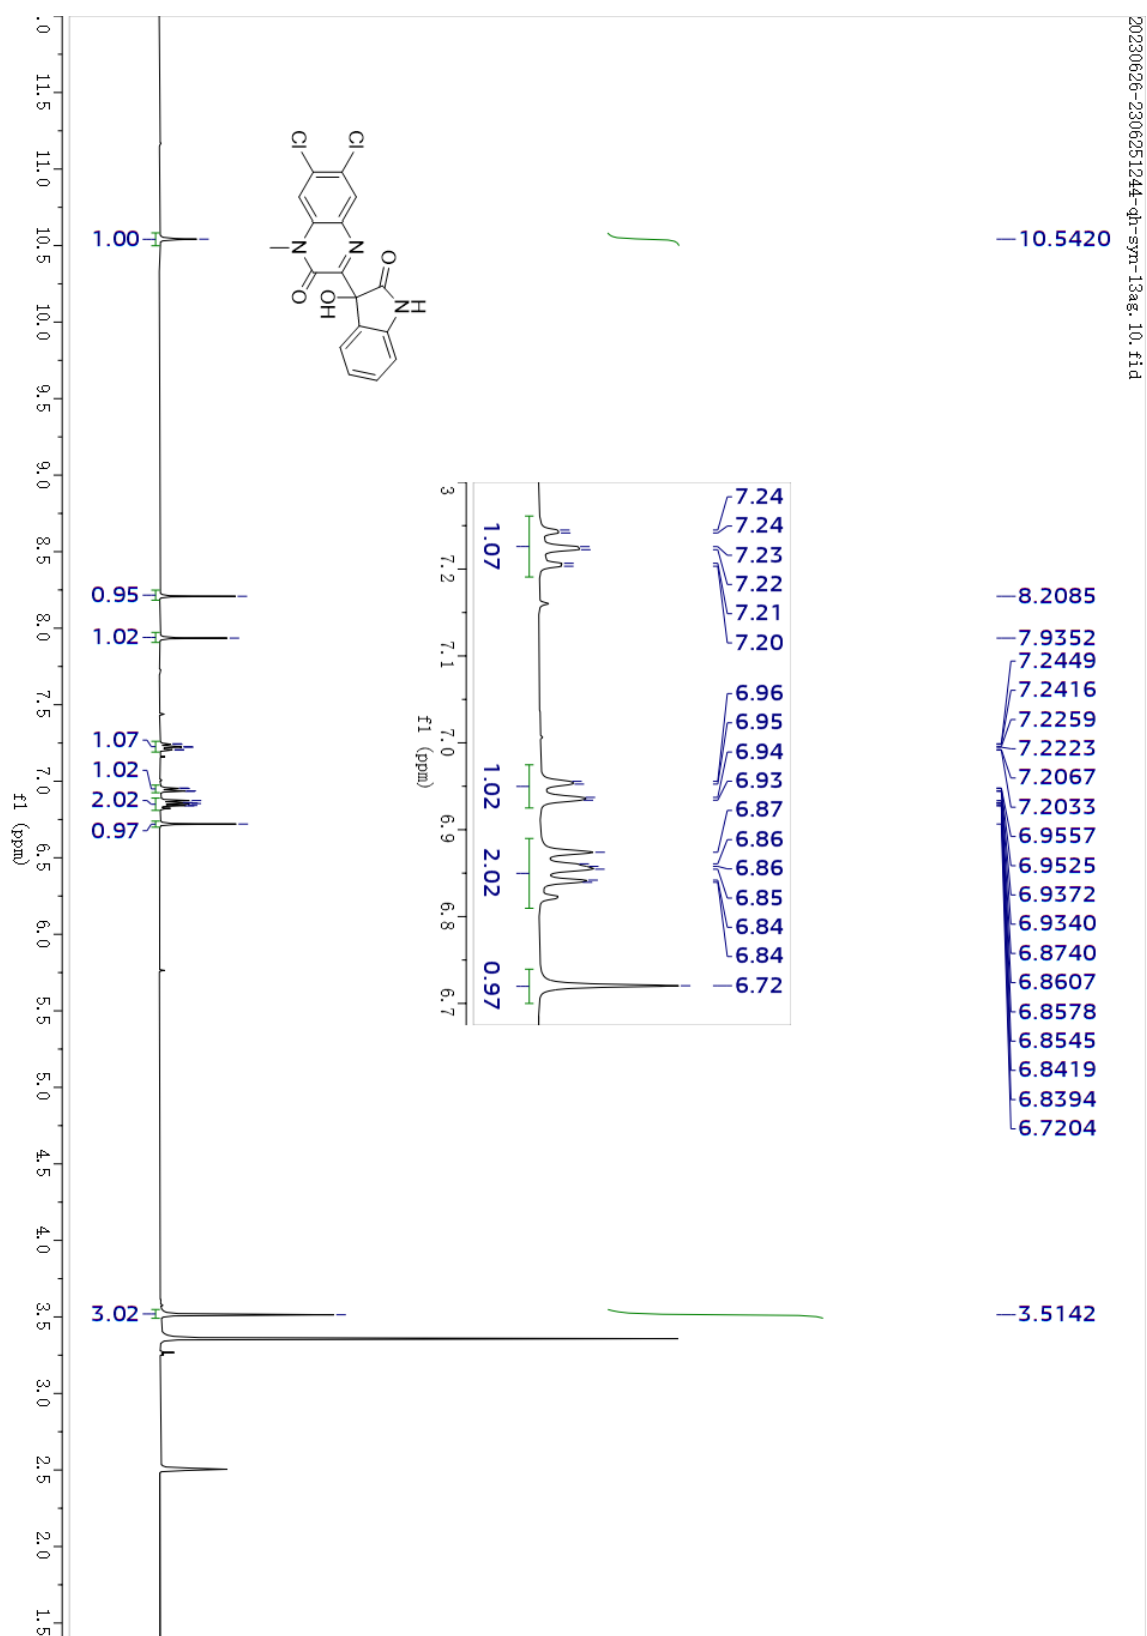

**Figure S45.** The  $^1\text{H}$  NMR Spectrum of Compound **3ak** in  $\text{DMSO}-d_6$

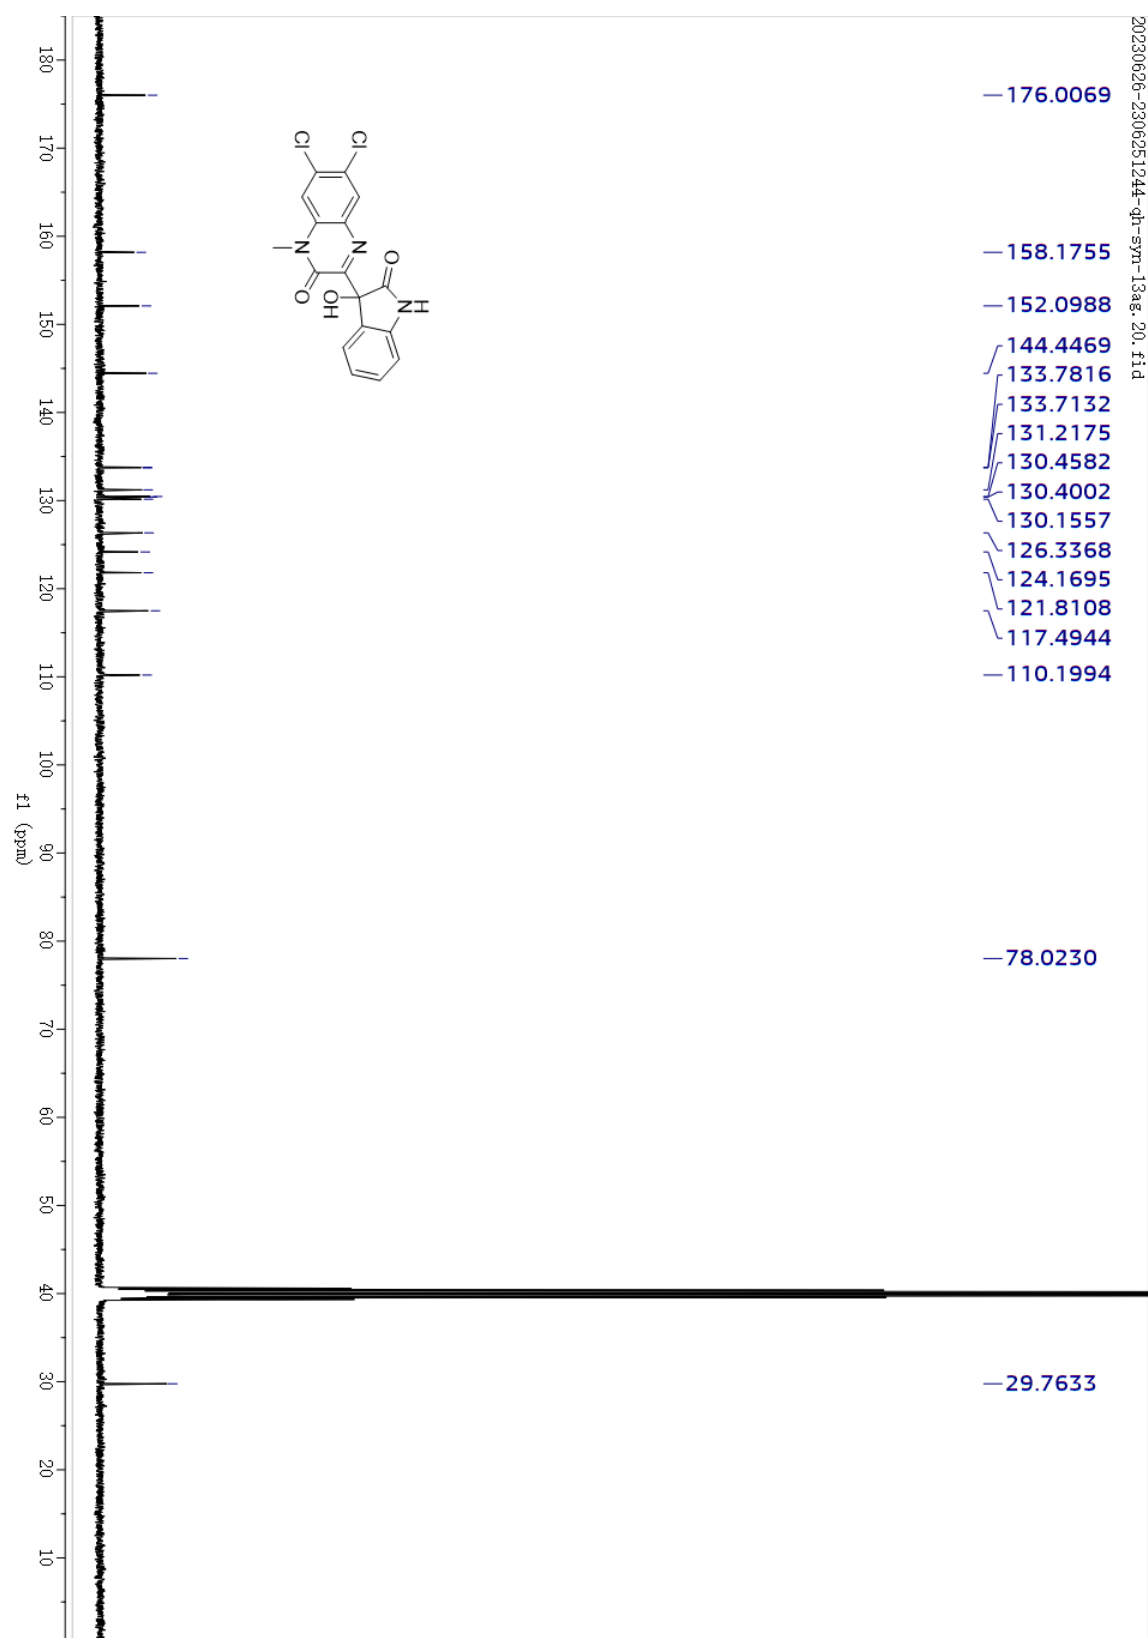

**Figure S46.** The <sup>13</sup>C NMR Spectrum of Compound **3ak** in DMSO-*d*<sub>6</sub>

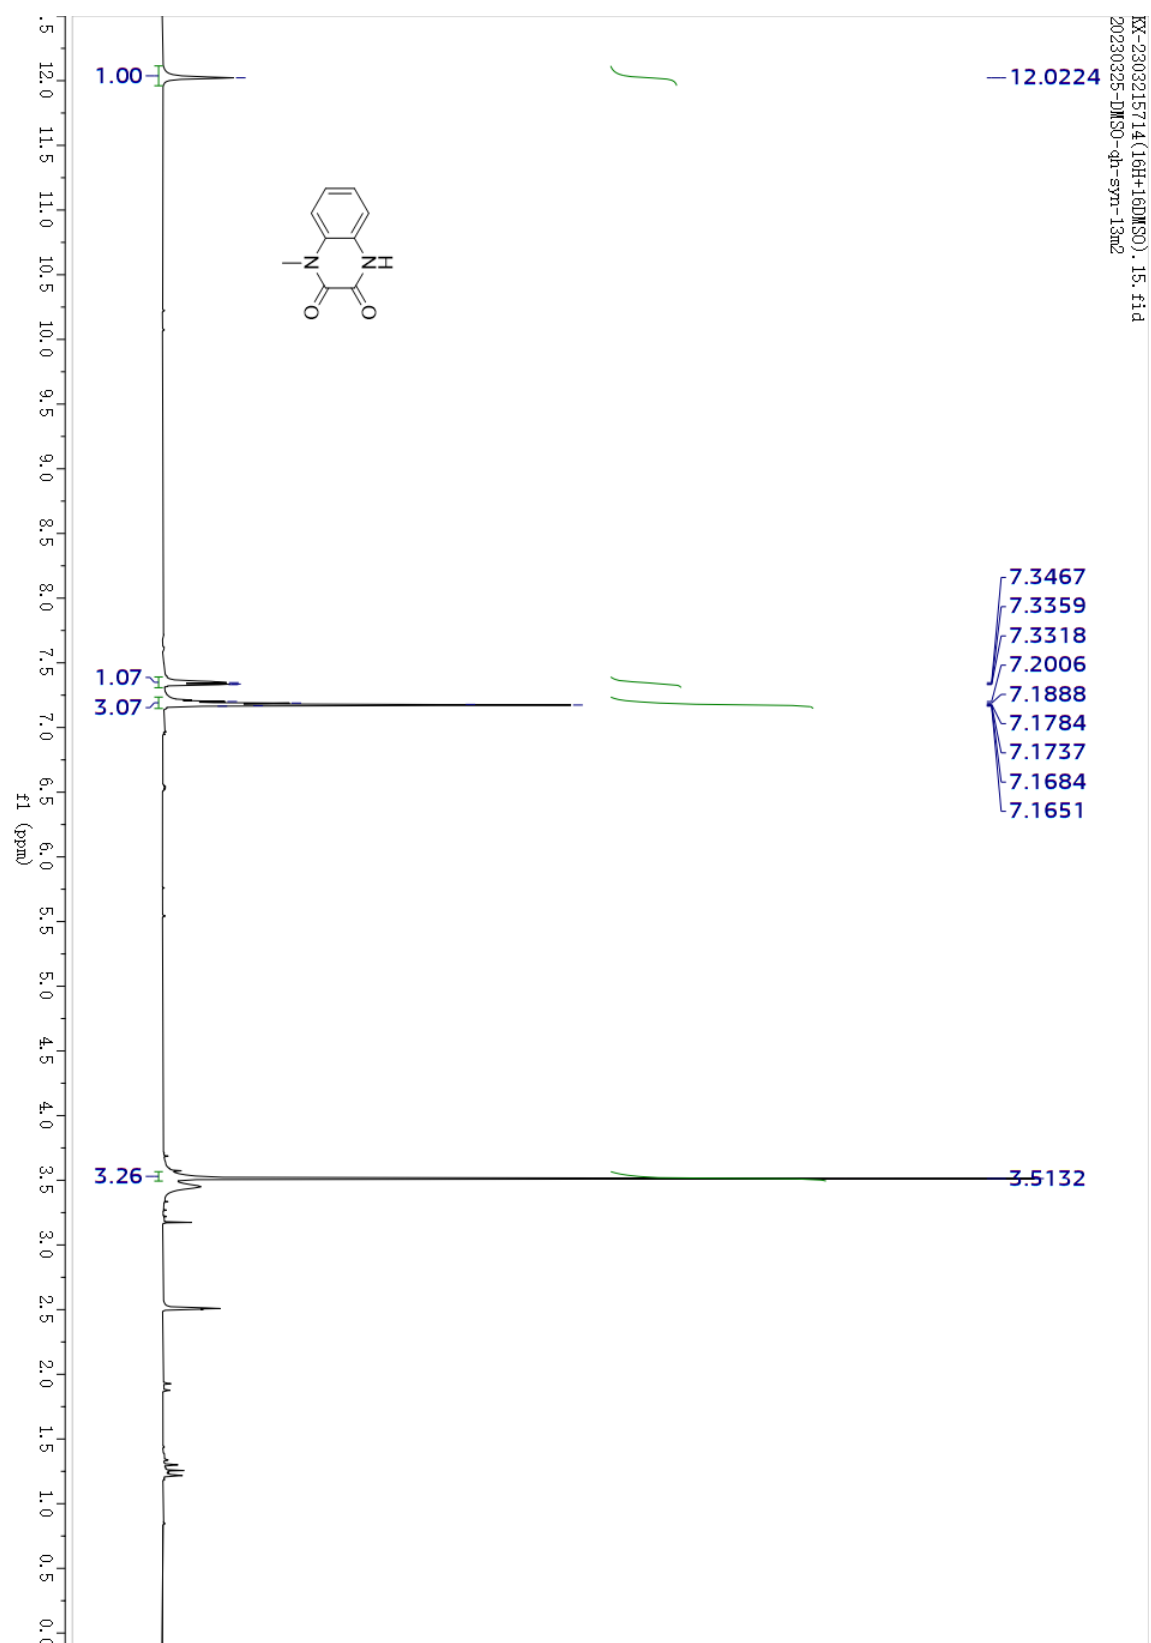

Figure S47. The  $^1\text{H}$  NMR Spectrum of Compound **4** in  $\text{DMSO}-d_6$
